# Supplementary material
Source: PubMed Central journal article supplement (PMC5777450)
Supplement: mmc1.pdf [file mmc1.pdf]

**The American Journal of Human Genetics, Volume 102**

## **Supplemental Data**

### **The Comoros Show the Earliest Austronesian**

#### **Gene Flow into the Swahili Corridor**

**Nicolas Brucato, Veronica Fernandes, Stéphane Mazières, Pradiptajati Kusuma, Murray P. Cox, Joseph Wainaina Ng'ang'a, Mohammed Omar, Marie-Claude Simeone-Senelle, Coralie Frassati, Farida Alshamali, Bertrand Fin, Anne Boland, Jean-Francois Deleuze, Mark Stoneking, Alexander Adelaar, Alison Crowther, Nicole Boivin, Luisa Pereira, Pascal Bailly, Jacques Chiaroni, and François-Xavier Ricaut**

## Supplemental data

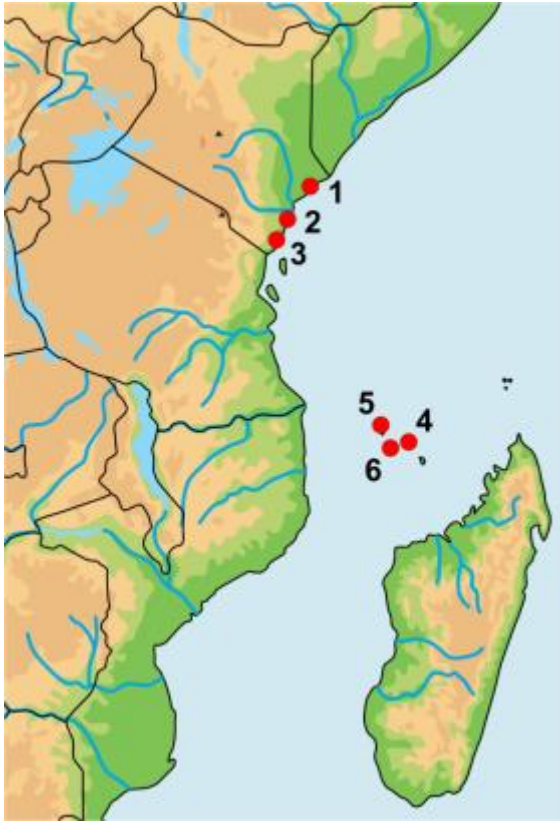

Figure S1. Location of the sampled groups. 1: Kenyan Swahili from Lamu (n=31); 2: Kenyan Swahili from Kilifi (n=37); 3: Kenyan Swahili from Mombasa (n=23); 4: Comorians from Anjouan island (n=16); 5: Comorians from Grande Comore island (n=18); 6: Comorians from Moheli island (n=15).

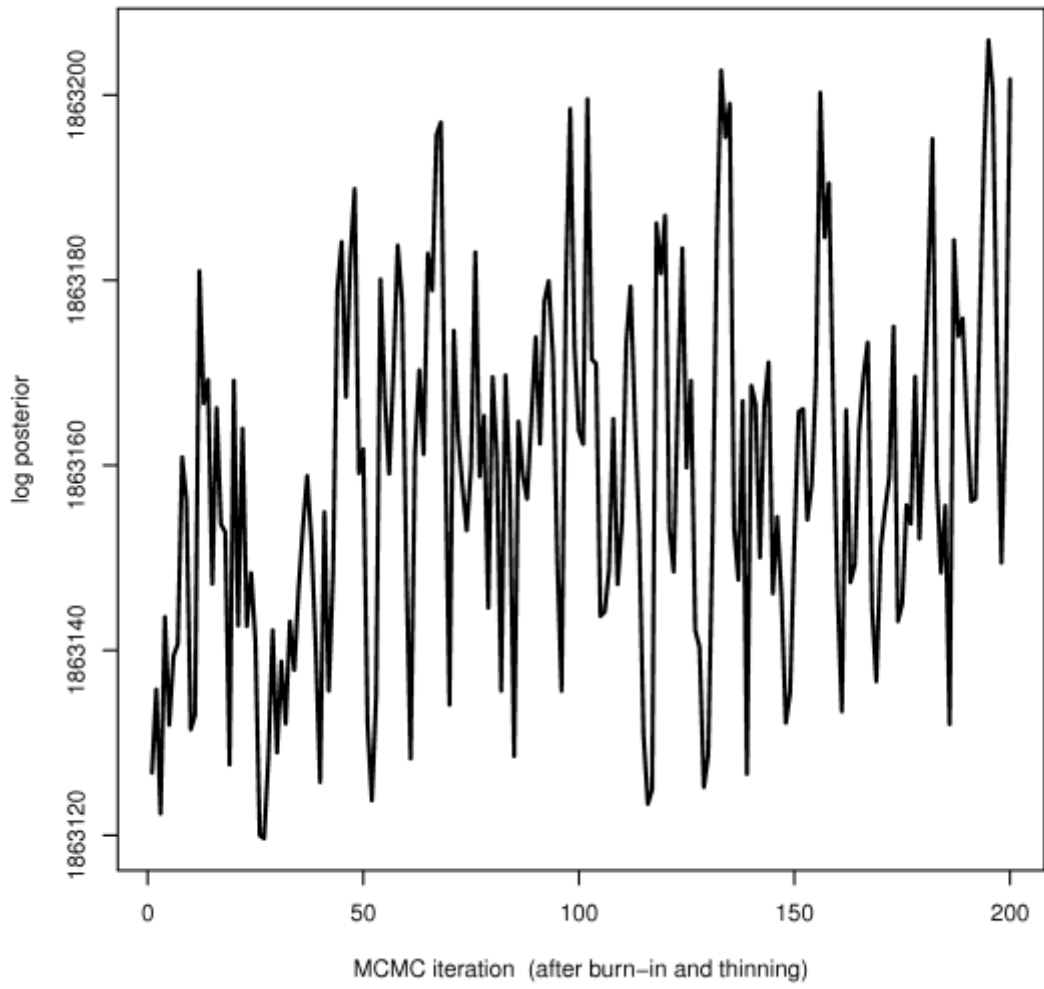

Figure S2. EEMS<sup>1</sup> posterior probability plot obtained after  $3 \times 10^6$  MCMC iterations.

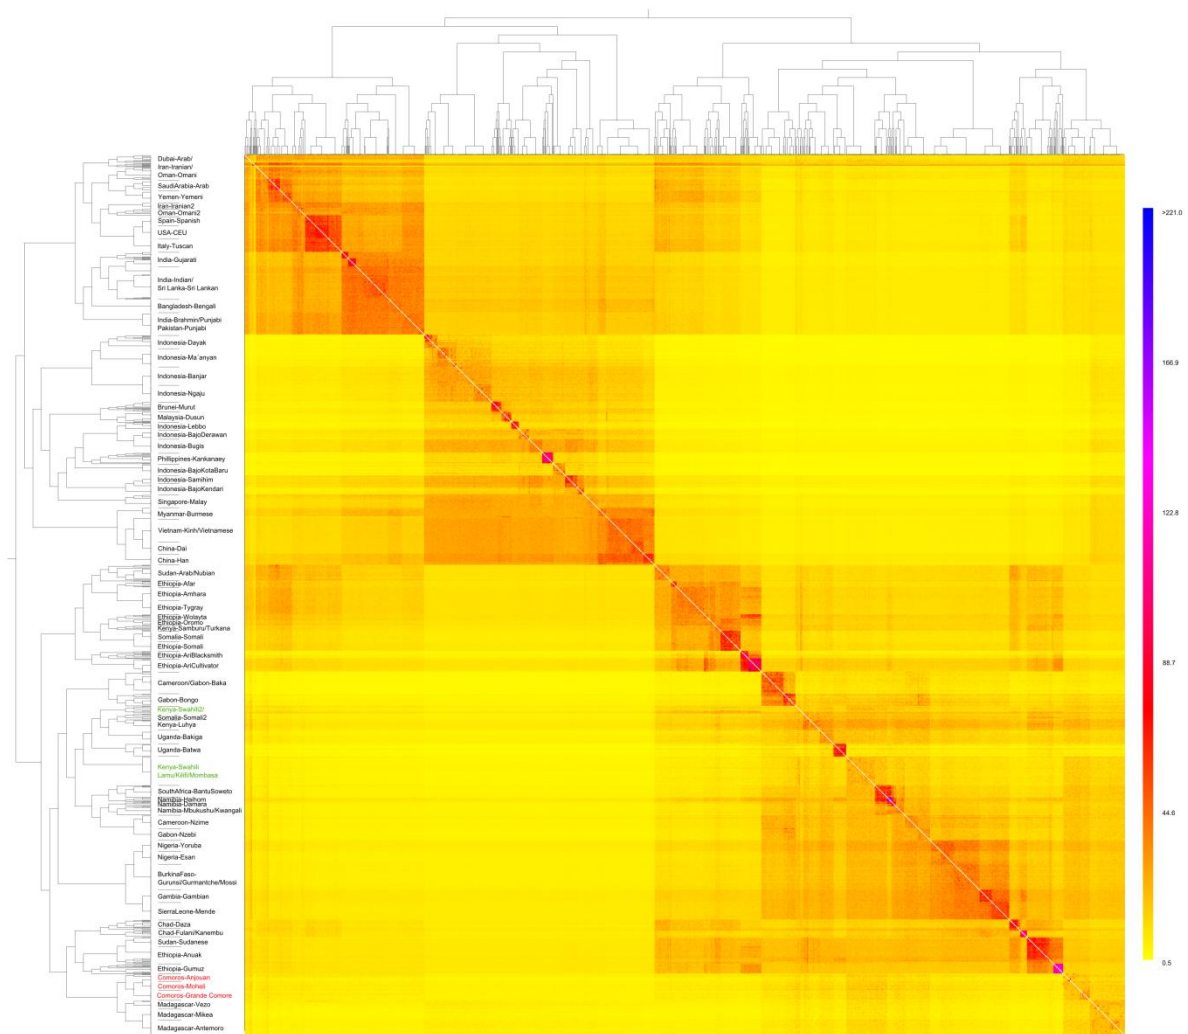

Figure S3. Coancestry heat map generated by fineSTRUCTURE<sup>2</sup> of the individuals included in the high SNP density dataset. The color scale indicates the chunk counts between each pair of individuals calculated by CHROMOPAINTER<sup>2</sup>. Red lettering highlights the Comoros clusters and green the Swahili clusters.

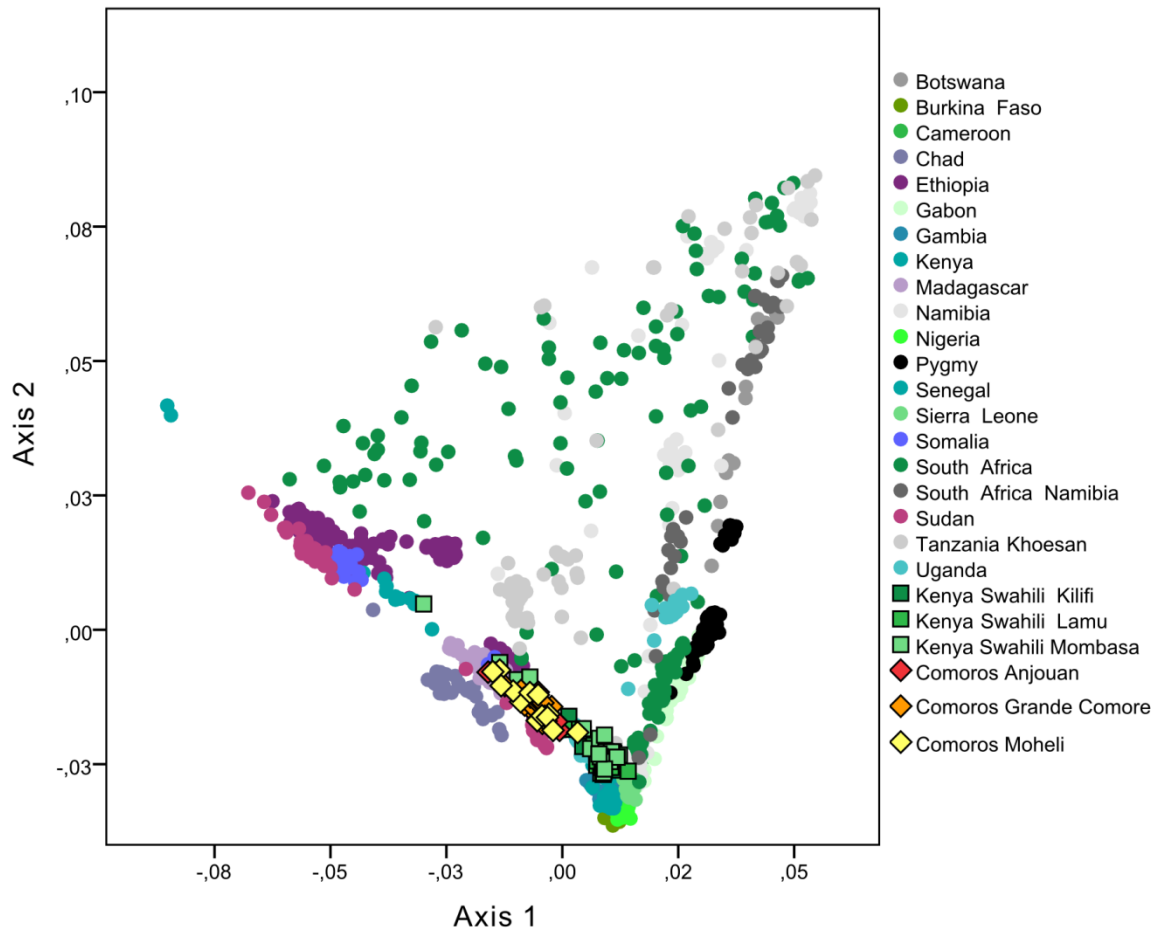

Figure S4. Principal Components Analysis of the African individuals in the 170K dataset using EIGENSOFT<sup>3</sup>. Swahili individuals are represented by squares; Comoros individuals by diamonds; all other African individuals from the 170K dataset by circles.

A

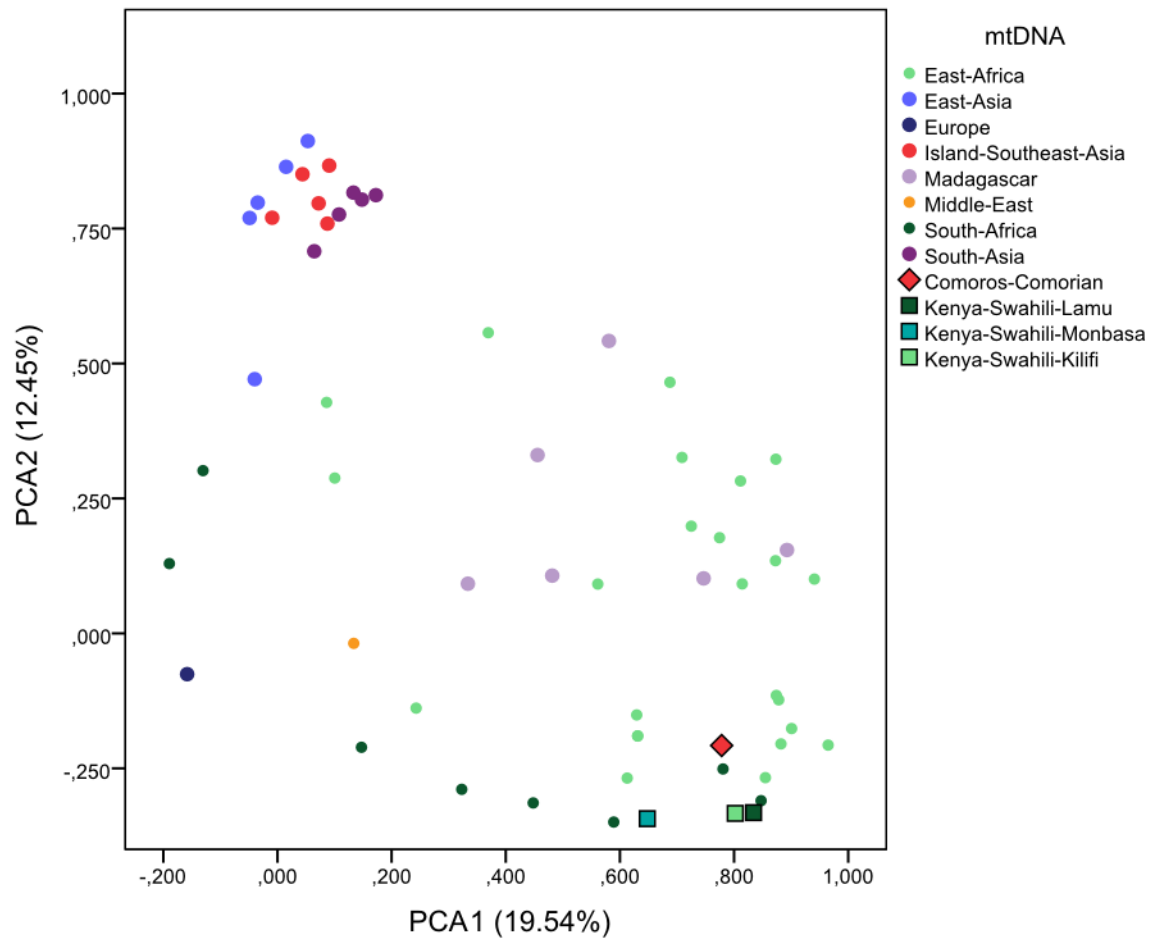

B

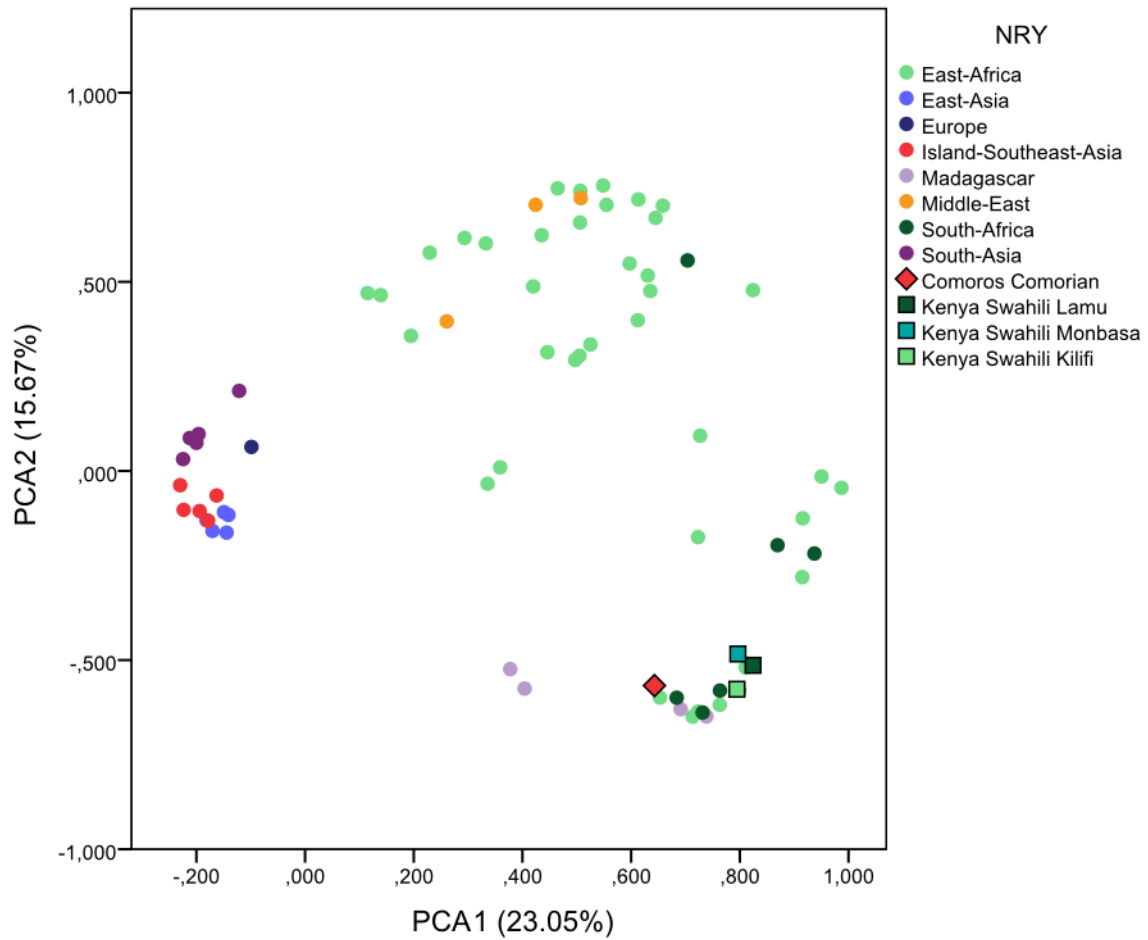

Figure S5. Principal Components Analyses of the uniparental datasets using SPSS<sup>3</sup>. (A) Scatterplot representing PCA 1 and 2 of the mtDNA data. (B) Scatterplot representing PCA 1 and 2 of the NRY data. Swahili populations are represented by squares; Comoros population from previously published data<sup>4</sup> by a diamond; all other groups by circles.

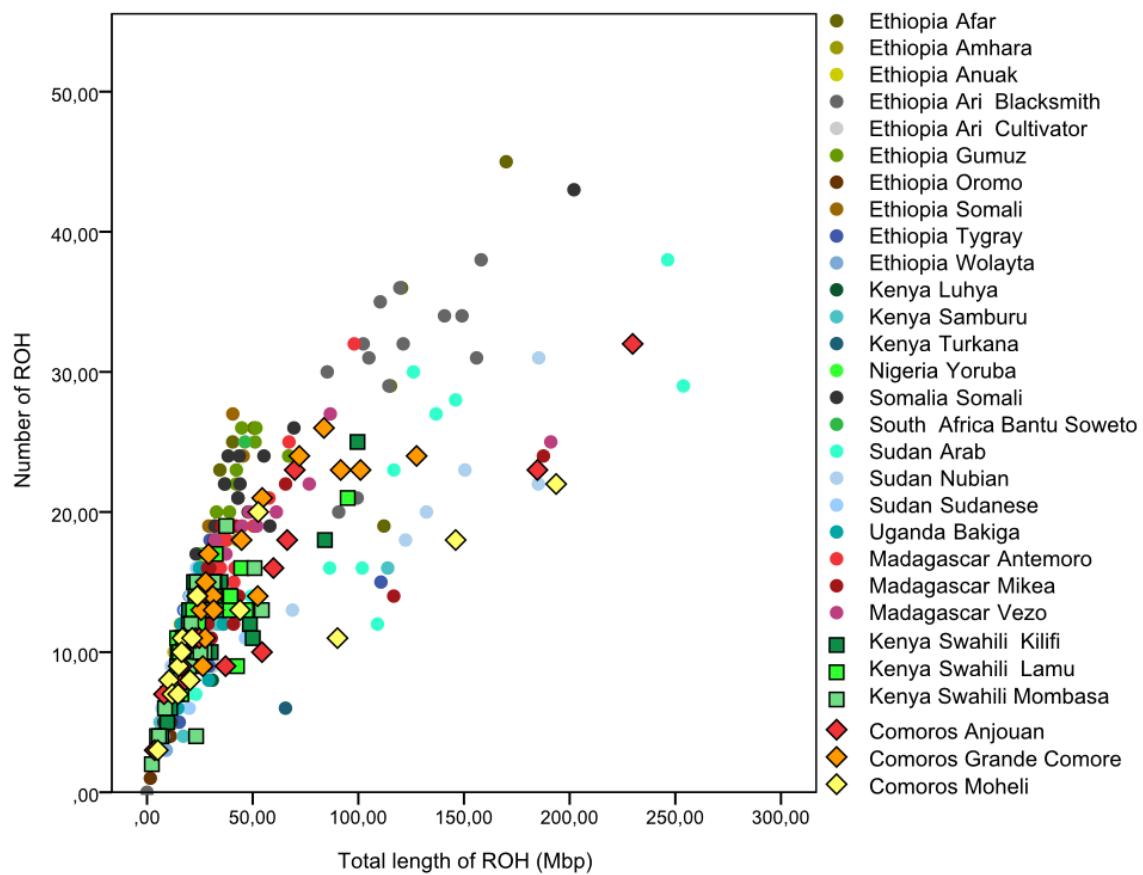

Figure S6. Scatterplot of Runs of Homozygosity (ROH) of East African individuals in the high SNP density dataset. Swahili individuals are represented by squares; Comoros individuals by diamonds; all East and South African individuals by circles.



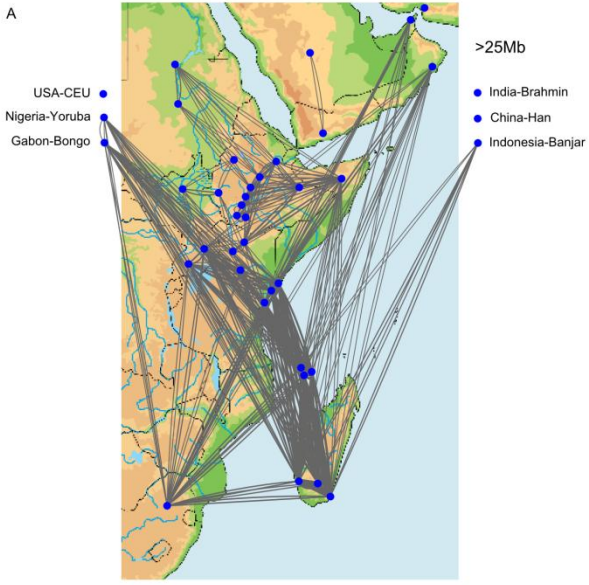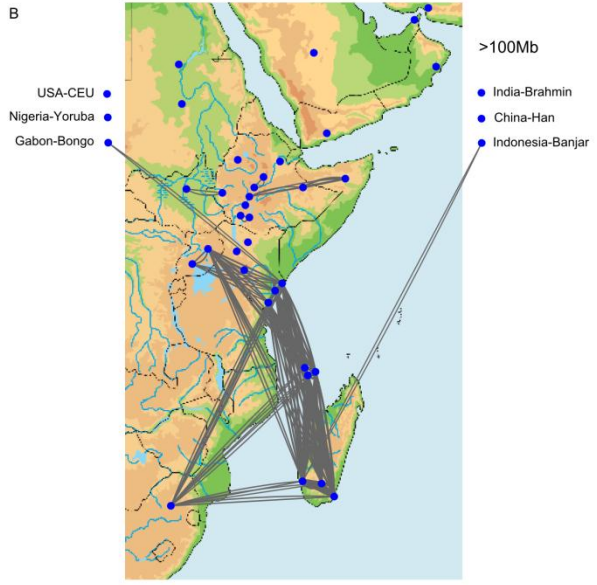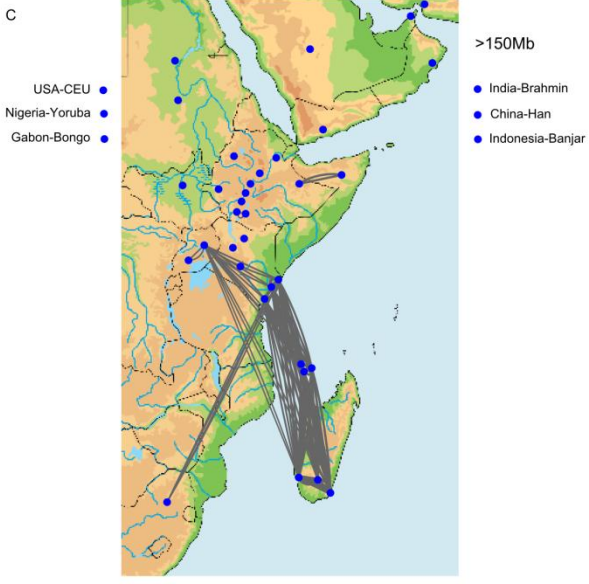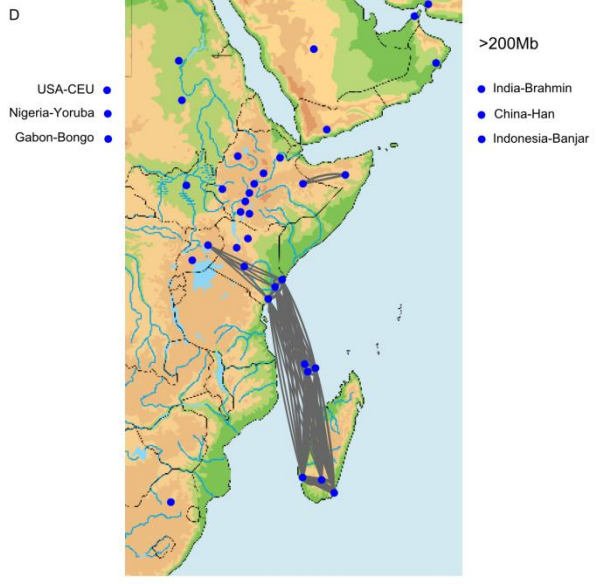

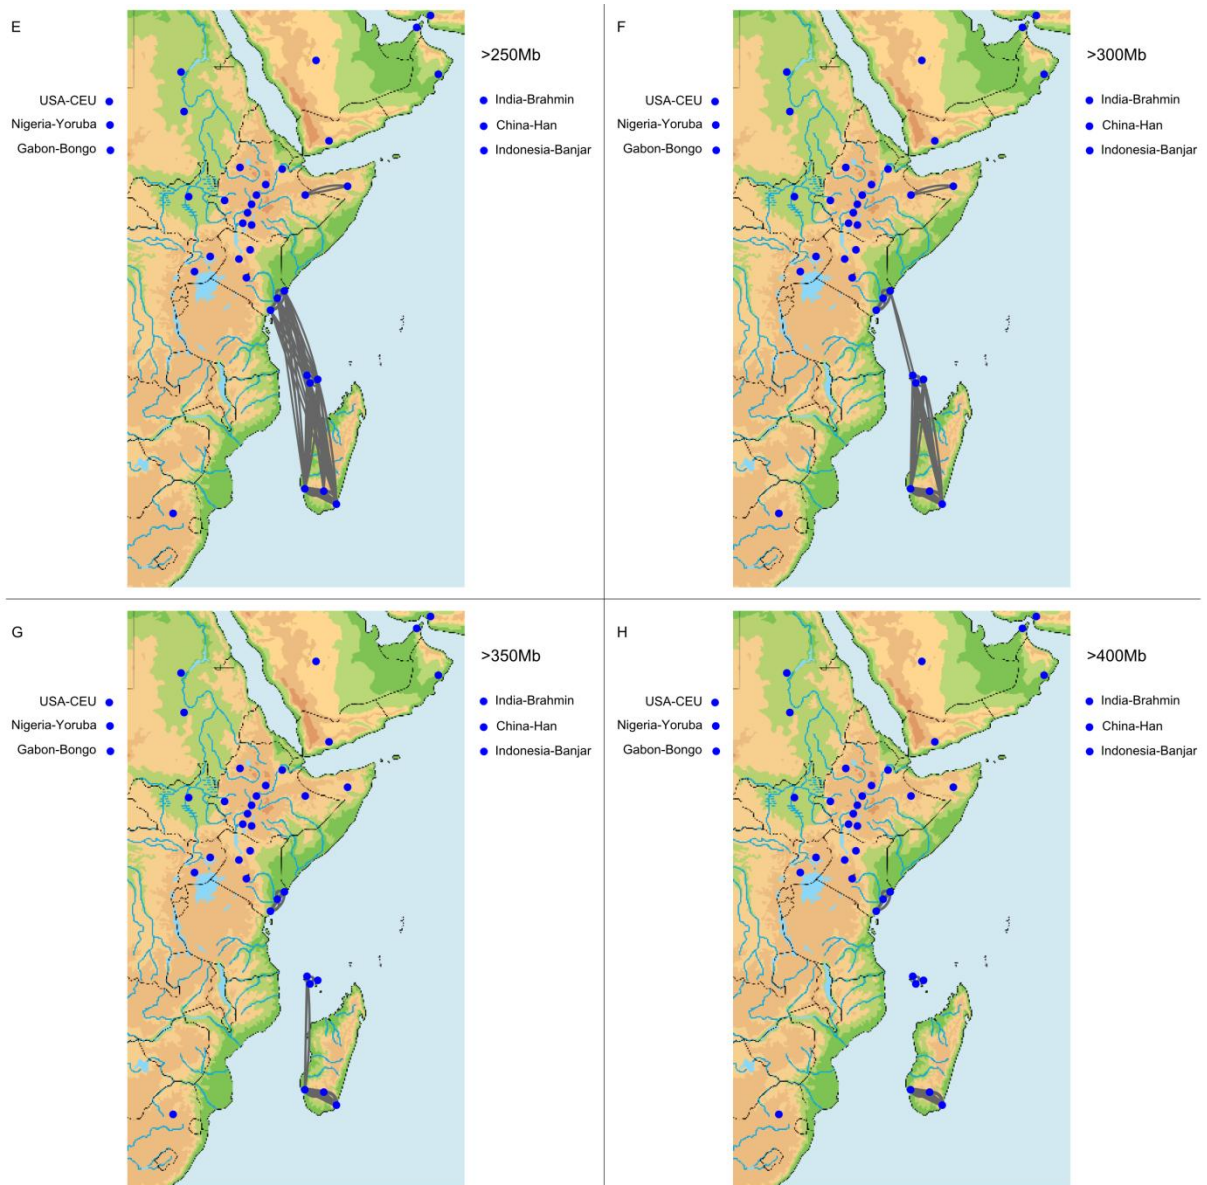

Figure S7. Map of the normalized sum of shared IBD fragments between East African populations and Middle Eastern populations and other populations of interest as estimated by RefinedIBD<sup>5,6</sup>. The width of each edge is proportional to the normalized sum of shared IBD. Each map represents the normalized sum of shared IBD according to different thresholds: A: >25Mb; B: >100Mb; C: >150Mb; D: >200Mb; E: >250Mb; F: >300Mb; G: >350Mb; H: >400Mb.

A

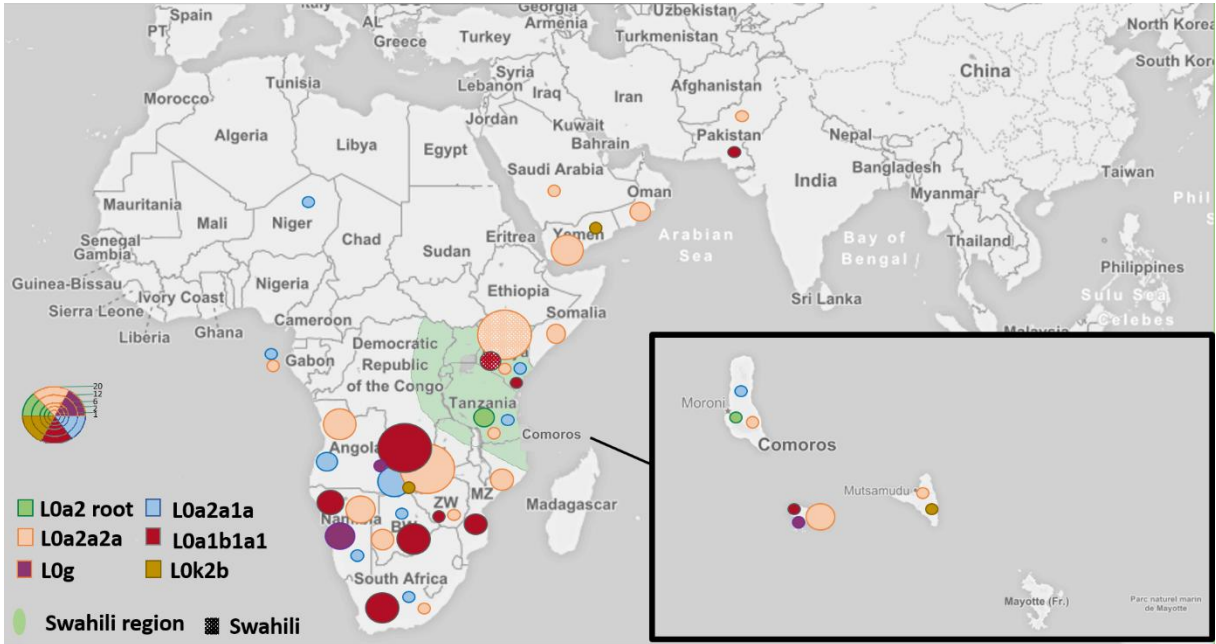

B

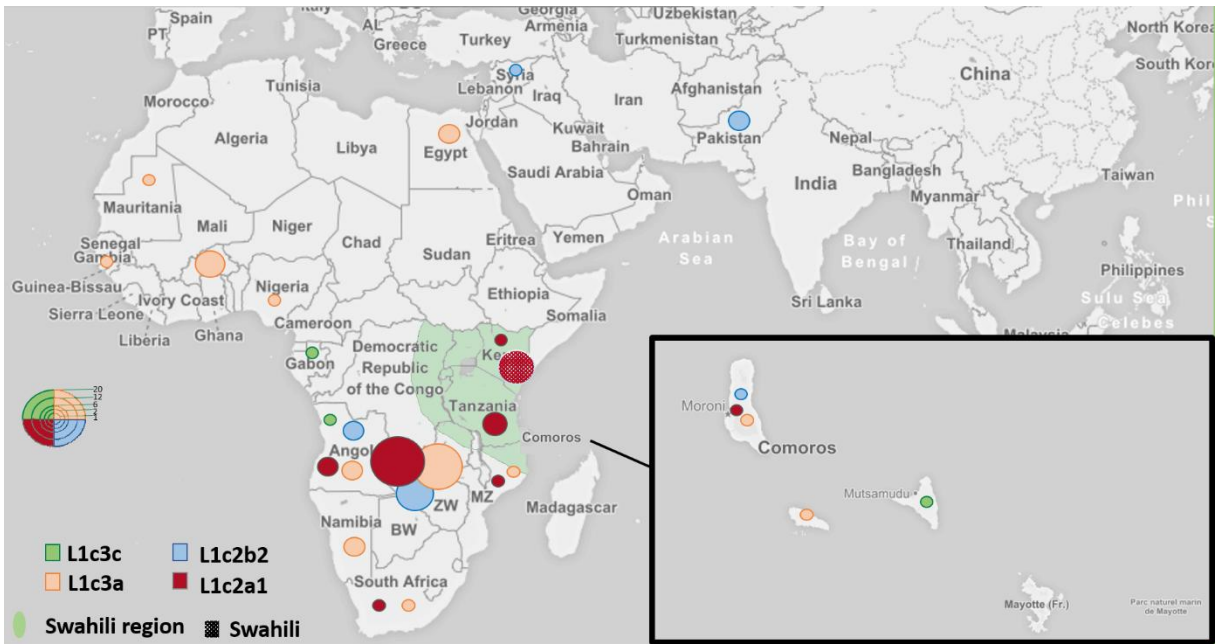

C

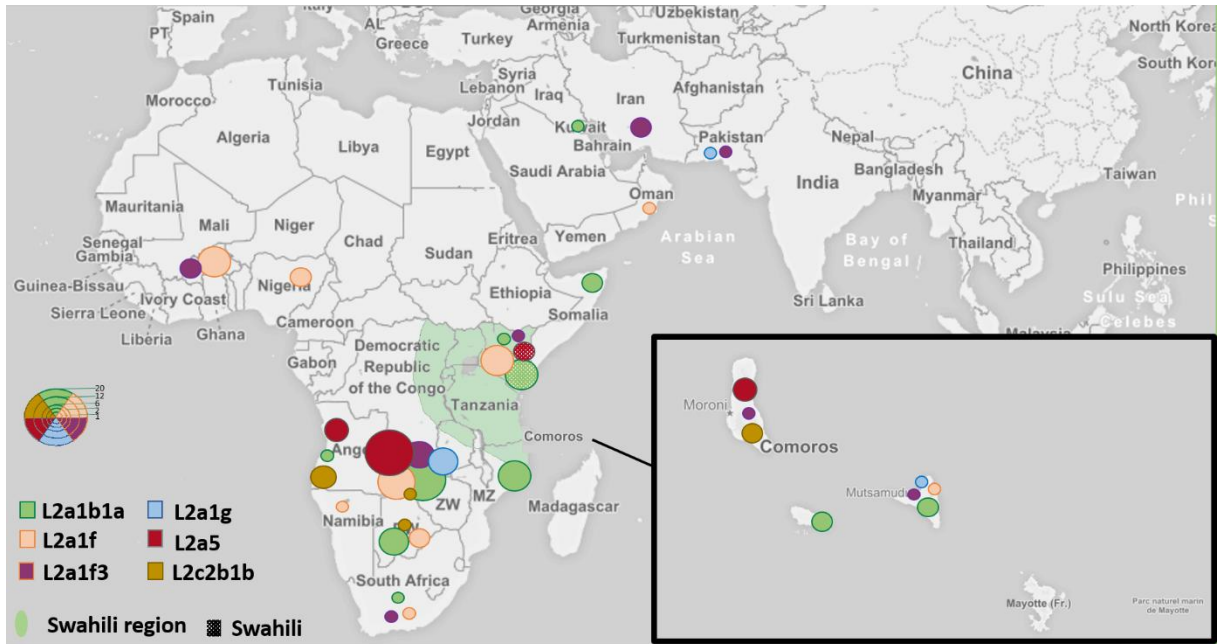

D

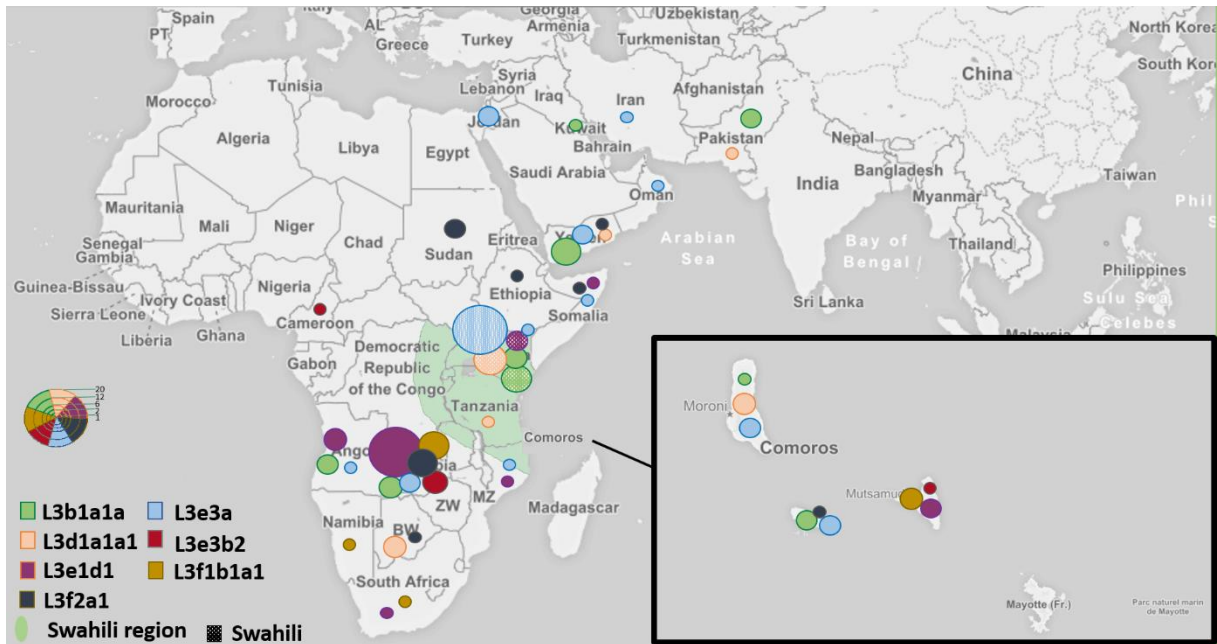

Figure S8. Geographic distribution of haplotype sharing of the most recent common ancestor with the Comorian haplotypes, separated by (A) L0 (B) L1 (C) L2 and (D) L3 haplogroups. The sizes of circles are proportional to the number of individuals.

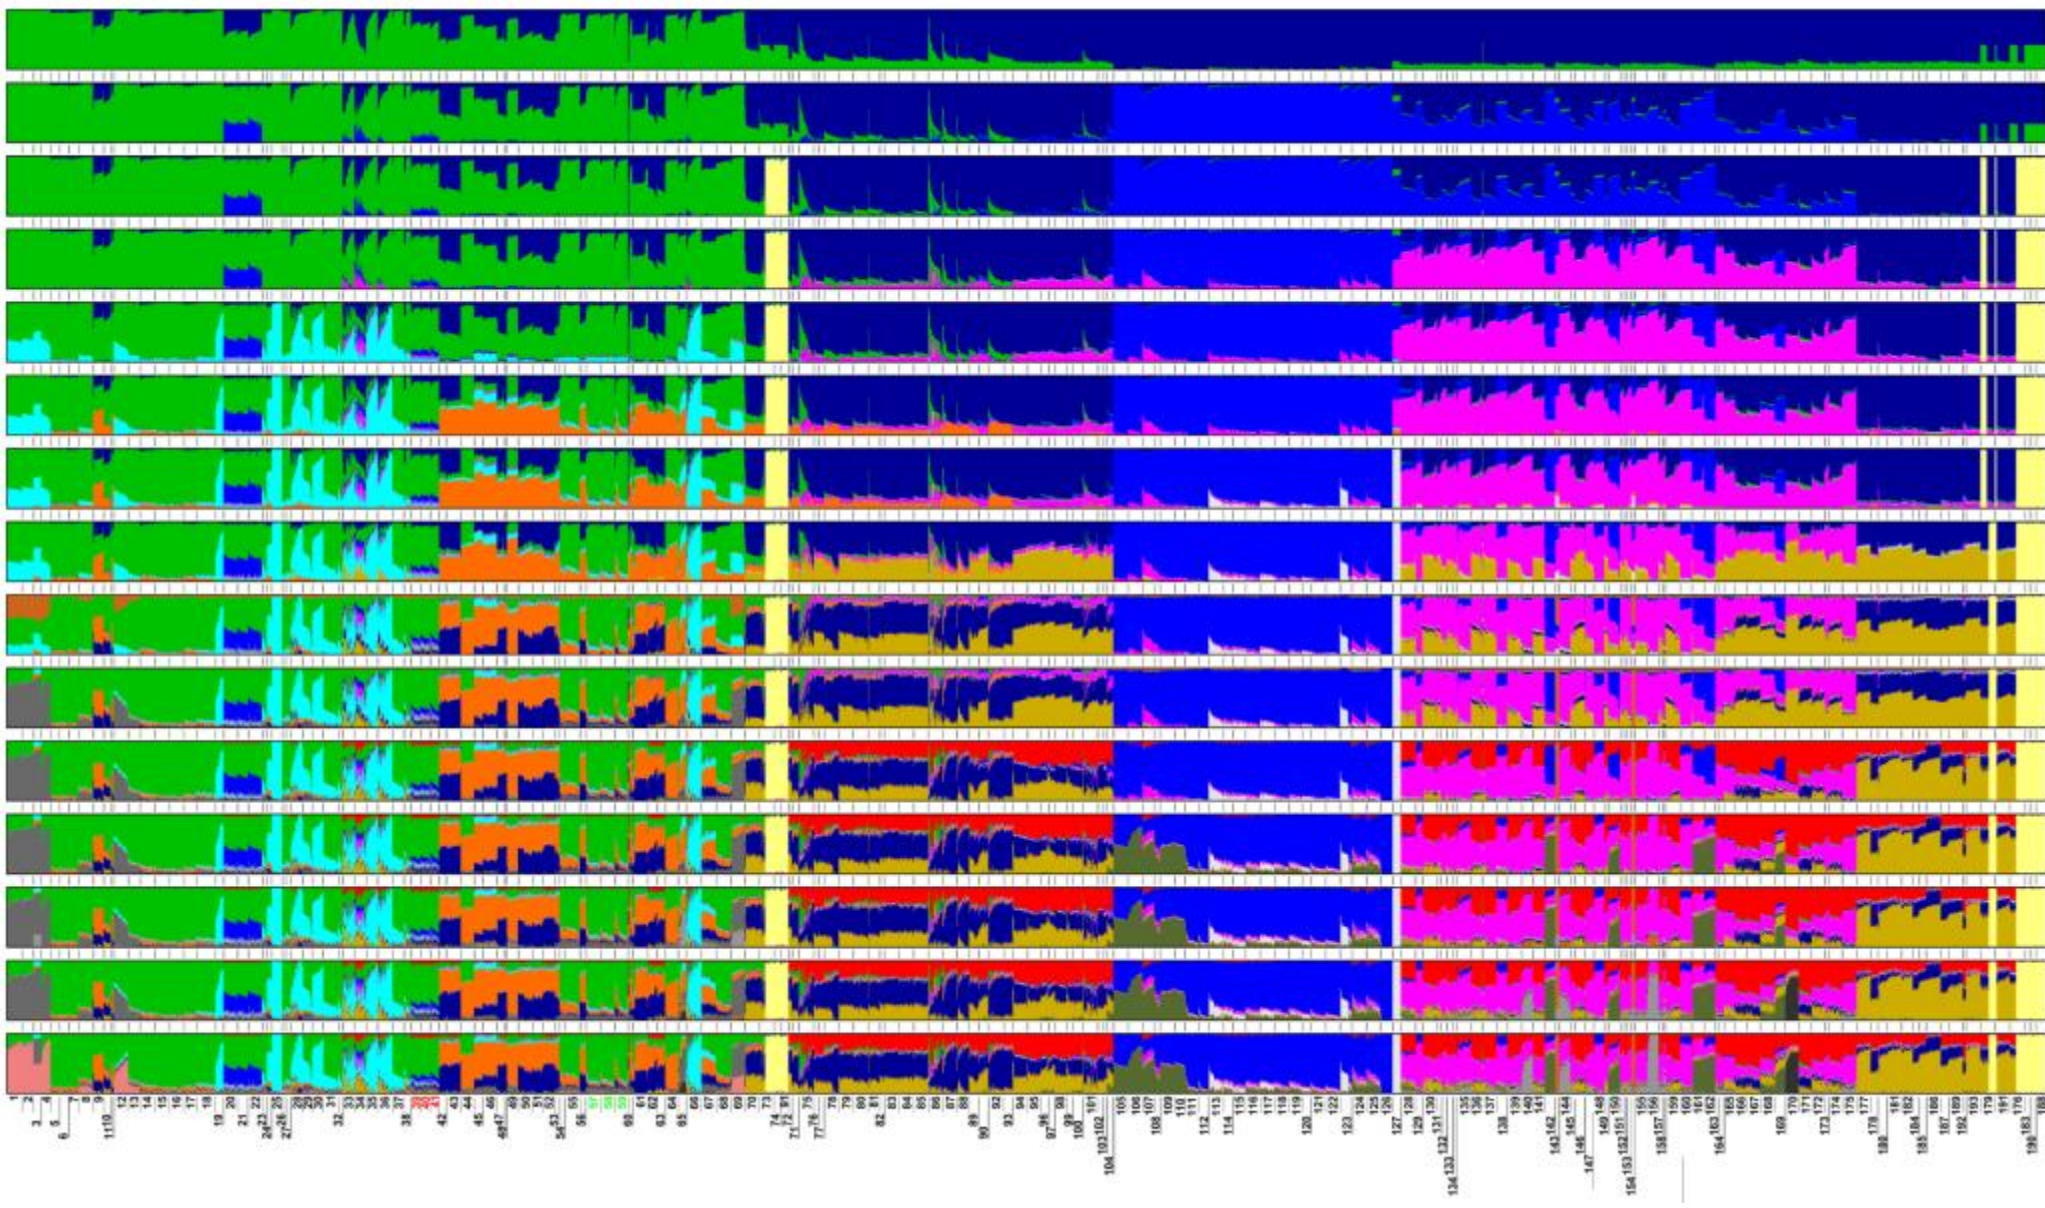

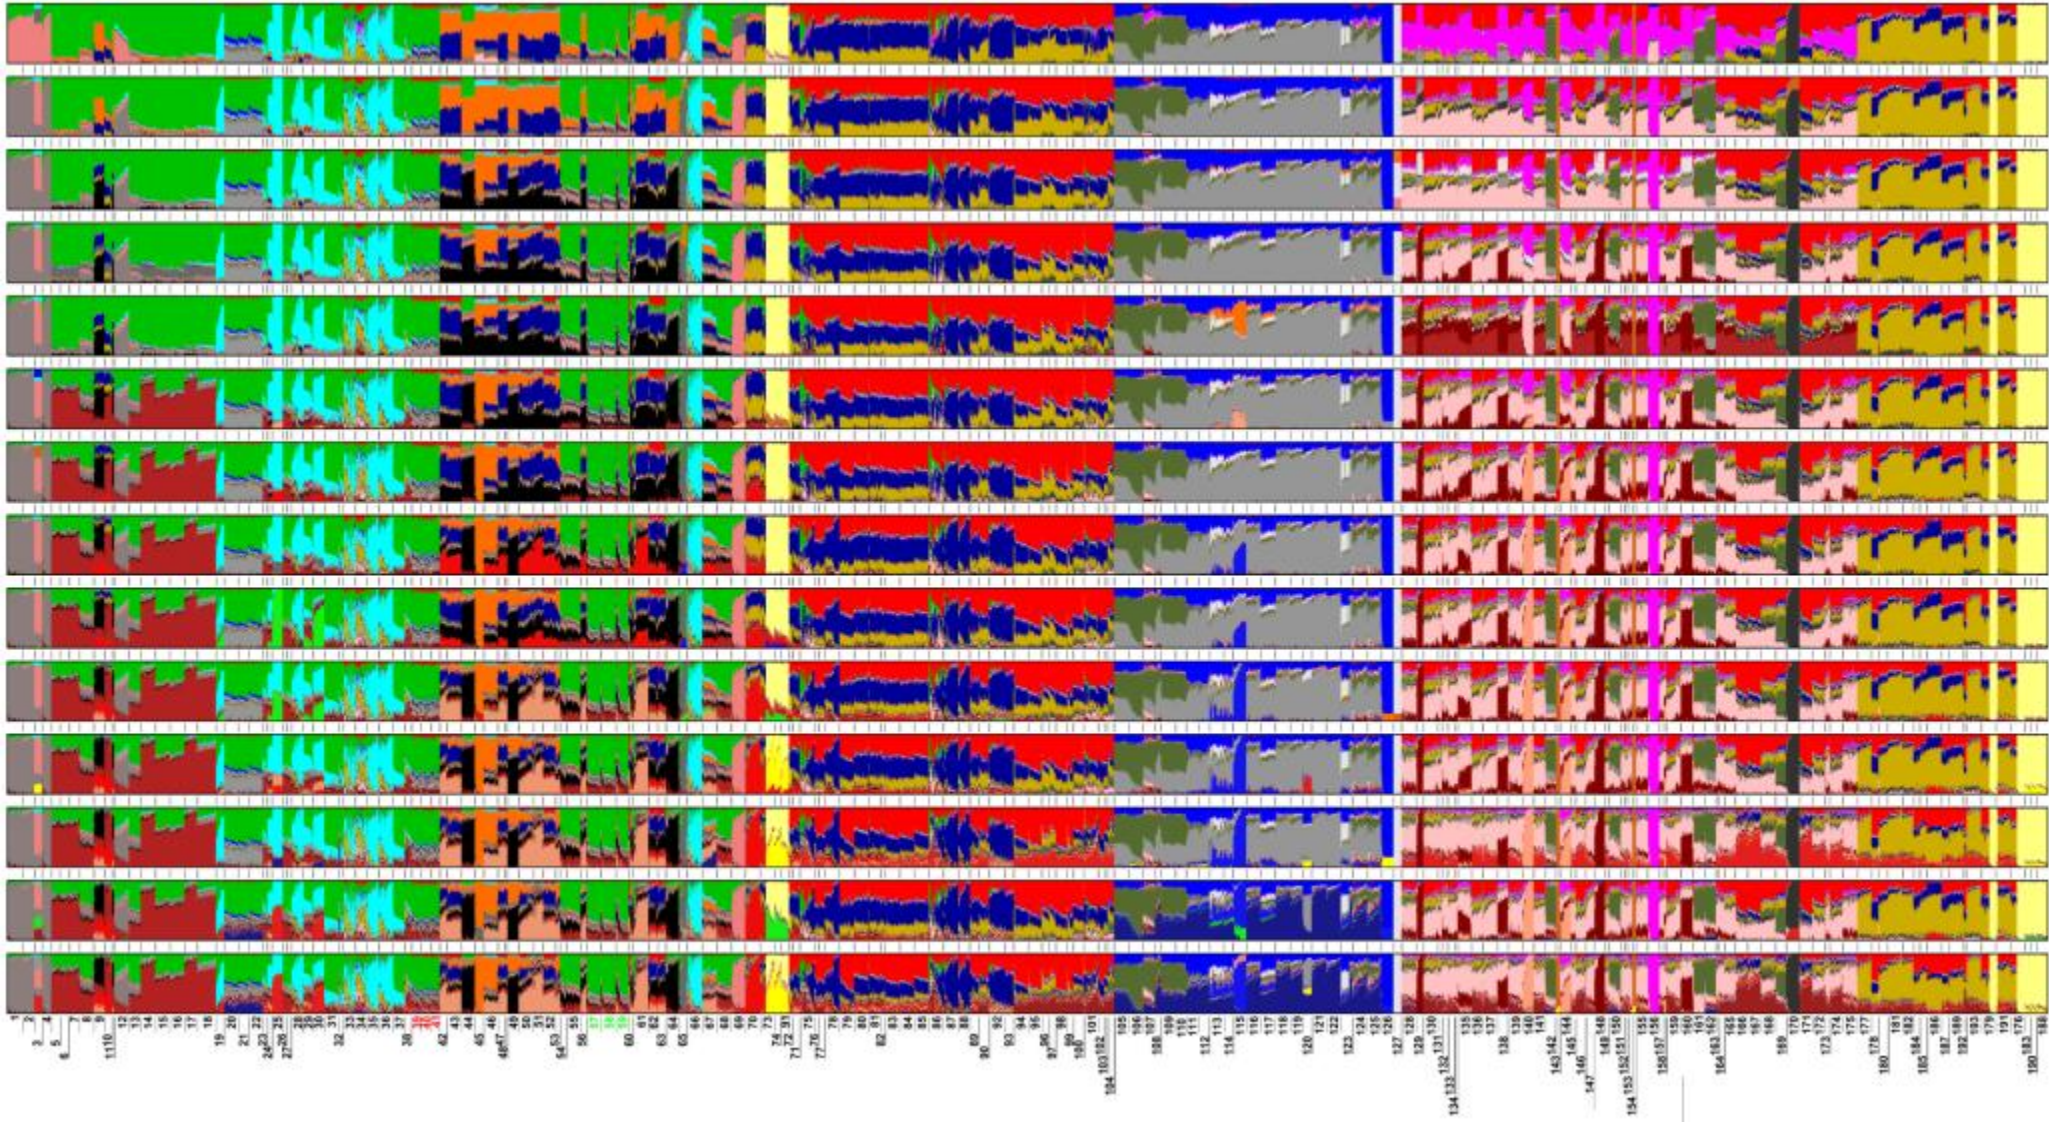

Figure S9. ADMIXTURE <sup>7</sup> plots obtained with CLUMPAK <sup>8</sup> (major modes) from K=2 to K=30 and visualized with Genesis <sup>9</sup>. Each colored line is an individual whose genetic background can be decomposed into K genetic components. Populations are coded as follows: 1: Cameroon Baka; 2: CAR Biaka Pygmy; 3: DR Congo Mbuti Pygmy; 4: Gabon Baka; 5: Burkina Faso Gurmantche; 6: Burkina Faso Gurunsi; 7: Burkina Faso Mossi; 8: Cameroon Nzime; 9: Chad Daza; 10: Chad Fulani; 11: Chad Kanembu; 12: Gabon Bongo; 13: Gabon Nzebi; 14: Gambia Gambian; 15: Nigeria Esan; 16: Nigeria Yoruba; 17: Senegal Mandenka; 18: Sierra Leone Mende; 19: Botswana GuiGhanaKgal; 20: Madagascar Antemoro; 21: Madagascar Mikea; 22: Madagascar Vezo; 23: Namibia Damara; 24: Namibia Haihom; 25: Namibia Juhoansi; 26: Namibia Kwangali; 27: Namibia Mbukushu; 28: Namibia Nama; 29: South Africa Namibia Khwe; 30: South Africa Namibia Xun; 31: South Africa Bantu Soweto; 32: South Africa BantuSA; 33: South Africa ColouredColesberg; 34: South Africa ColouredWellington; 35: South Africa Karretjie; 36: South Africa Khomani; 37: South Africa SEBantu; 38: South Africa SWBantu; 39: Comoros Anjouan; 40: Comoros Grande Comore; 41: Comoros Moheli; 42: Ethiopia Afar; 43: Ethiopia Amhara; 44: Ethiopia Anuak; 45: Ethiopia Ari Blacksmith; 46: Ethiopia Ari Cultivator; 47: Ethiopia Ethiopian Jews; 48: Ethiopia Ethiopians; 49: Ethiopia Gumuz; 50: Ethiopia Oromo; 51: Ethiopia Somali; 52: Ethiopia Tygray; 53: Ethiopia Wolayta; 54: Kenya BantuKenya; 55: Kenya Luhya; 56: Kenya Samburu; 57: Kenya Swahili Kilifi; 58: Kenya Swahili Lamu; 59: Kenya Swahili Mombasa; 60: Kenya Turkana; 61: Somalia Somali; 62: Sudan Arab; 63: Sudan Nubian; 64: Sudan Sudanese; 65: Tanzania Hazda; 66: Tanzania San; 67: Tanzania Sandawe; 68: Uganda Bakiga; 69: Uganda Batwa; 70: Algeria Mozabite; 71: Egypt Egyptian; 72: Lybia Lybian Jew; 73: Morocco Moroccan; 74: Tunisia Tunisian; 75: Dubai Arab; 76: Irak Kurd Jew; 77: Iraq Iraqi Jews; 78: Israel Bedouin; 79: Israel Druze; 80: Israel Palestinian; 81: Jordania Jordanian; 82: Lebanon Lebanese; 83: Lebanon Lebanese Christian; 84: Lebanon Lebanese Druze; 85: Lebanon Lebanese Muslim; 86: Oman Omani; 87: Saudi Arabia Arab; 88: Saudi Arabia Saudi; 89: Syria Syrians; 90: Turkey Turks; 91: UAE Arab; 92: Yemen Yemeni; 93: Yemen Yemenite Jews; 94: Armenia Armenian; 95: Georgia Abkhasian; 96: Georgia Balkar; 97: Georgia Chechen; 98: Georgia Georgian; 99: Iran Azeri; 100: Iran Iranian; 101: Iran Iranian Jew; 102: Kazakhstan Kurd; 103: Turkmenistan Turkmen; 104: China Dai; 105: China Han; 106: Burma Burmese; 107: Cambodia Cambodian; 108: Vietnam Kinh; 109: Vietnam Vietnamese; 110: Brunei Dusun; 111: Brunei Murut; 112: Indonesia Bajo; 113: Indonesia Bajo Derawan; 114: Indonesia Bajo Kotabaru; 115: Indonesia Banjar; 116: Indonesia Bugis; 117: Indonesia Dayak; 118: Indonesia Dayak Ngaju; 119: Indonesia Lebbo; 120: Indonesia Ma'anyan; 121: Indonesia Samihim; 122: Indonesia Warukin; 123: Malaysia Malay; 124: Philippines Igorot; 125: Singapore Malay; 126: Papua New Guinea Papuan; 127: Bangladesh Bengali; 128: India Birhor; 129: India Brahmin; 130: India Brahmins from; 131: Uttar Pradesh; 132: India Chamar; 133: India Dharkar; 134: India Dusadh; 135: India Gond; 136: India Gujarat Brahmin; 137: India Gujarati; 138: India Ho; 139: India Indian; 140: India Irula; 141: India Iyer; 142: India Jamatia; 143: India Jarawa; 144: India Kadar; 145: India Kanjars; 146: India Khatri; 147: India Kol; 148: India Korva; 149: India Kshatriya; 150: India Manipuri Brahmin; 151: India Maratha; 152: India Muslim; 153: India North Kannadi; 154: India Onge; 155: India Palian; 156: India Paniya; 157: India Piramalai Kallar; 158: India Pulliyar; 159: India Punjabi; 160: India Santal; 161: India Tharu; 162: India Tripuri; 163: India Uttar Pradesh; 164: Scheduled Caste; 165: India Velama; 166: India West Bengal Brahmin; 167: Pakistan Balochi; 168: Pakistan Brahui; 169: Pakistan Burusho; 170: Pakistan Hazara; 171: Pakistan Kalash; 172: Pakistan Makrani; 173: Pakistan Pathan; 174: Pakistan Punjabi; 175: Pakistan Sindhi; 176: Sri Lanka Sri Lankan; 177: Bulgaria Bulgarian; 178: Croatia Croatian; 179: Cyprus Cypriot; 180: Greece Greek; 181: Romania Romanian; 182: France French; 183: Hungary Hungarian; 184: Italy East Sicilian; 185: Italy Italian Abruzzo; 186: Italy Italian Bergamo; 187: Italy Sardinian; 188: Italy Sicilian; 189: Italy South Italian; 190: Italy Tuscan; 191: Italy West Sicilian; 192: Spain Spanish; 193: Russia Azeri; 194: USA CEU

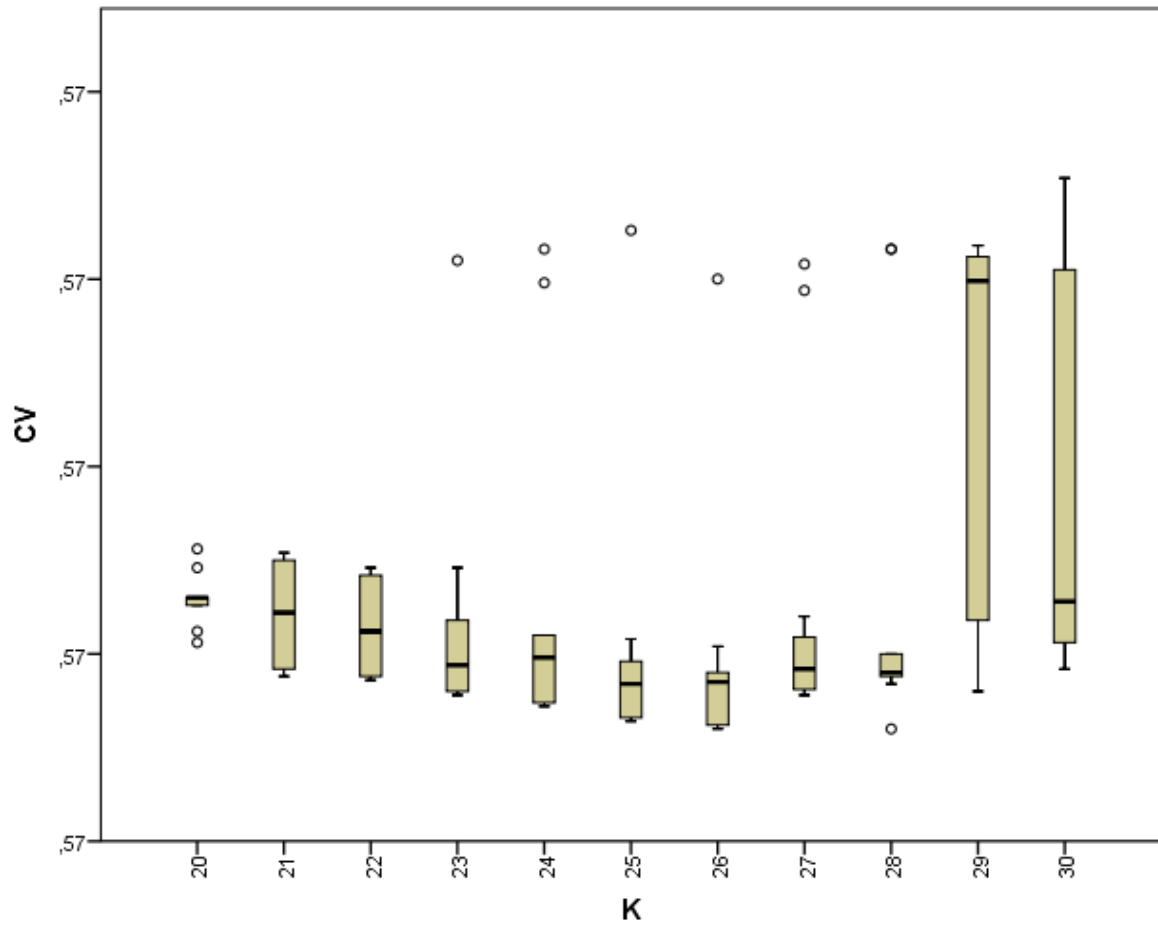

Figure S10. Box plots of cross-validation values obtained with ADMIXTURE <sup>7</sup> runs from K=20 to K=30 after 10 iterations.



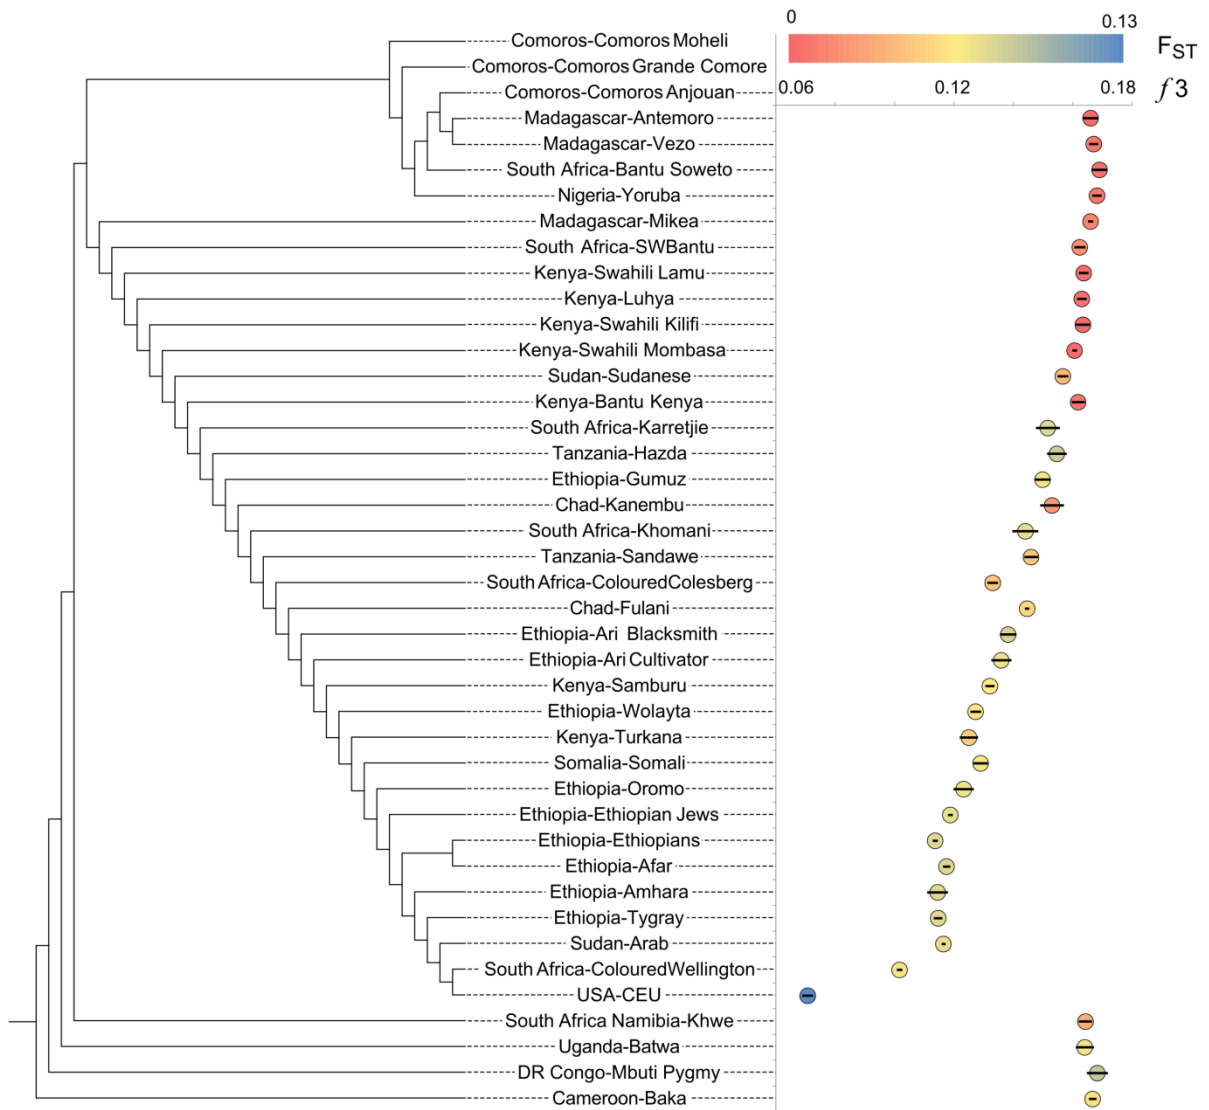

Figure S11. Comparison of the African genetic ancestry of the Comoros by a TREEMIX dendrogram<sup>10</sup>,  $F_{ST}$  distances and  $f_3$  statistics, all based on the African-SNP dataset generated with PCAdmix<sup>11</sup>. The TreeMix dendrogram was inferred imposing no a priori assumptions of migration, displaying only the tree topology. (B) Values of the  $f_3$ (African-SNP: Comoros-Anjouan, X; China-Han) statistics are represented by dots with standard error bars. The color of each dot corresponds to the  $F_{ST}$  distances between the African ancestry in the Comoros-Anjouan and each African population using a blue-yellow-red color scale from the highest (0.125) to the lowest values (0.006). All those values are provided in Table S10.

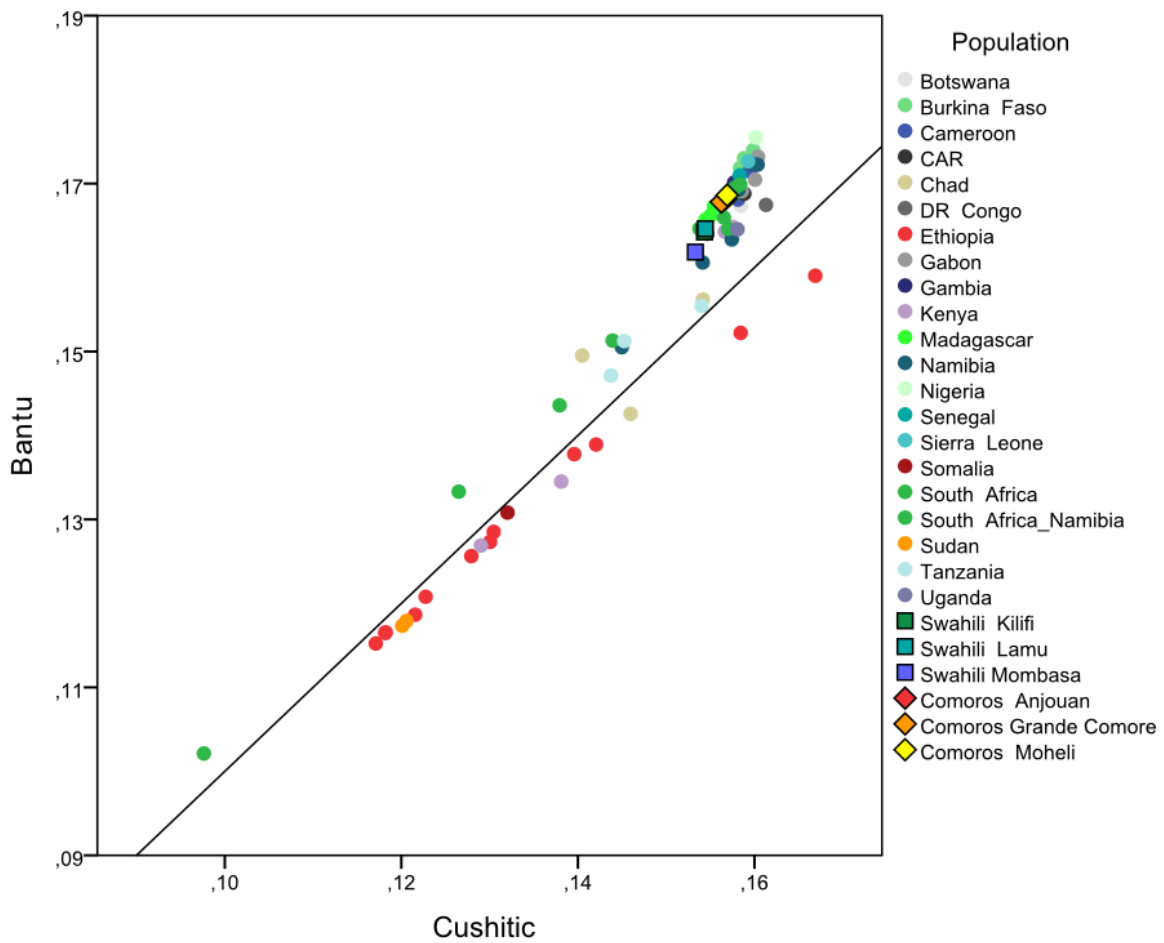

Figure S12. Scatterplot of the  $f_3$ -outgroup statistics on the African-SNP dataset generated with PCAdmix<sup>11</sup>. The x-axis shows the values of  $f_3(\text{African-SNP: Sudan-Sudanese, X; China-Han})$ , representing a Cushitic genetic ancestry. The y-axis shows the values of  $f_3(\text{African-SNP: Nigeria-Yoruba, X; China-Han})$ , representing a Bantu genetic ancestry. Swahili populations are represented by a square; Comoros populations by a diamond; all other African population from the low SNP-density dataset by a circle.

A.

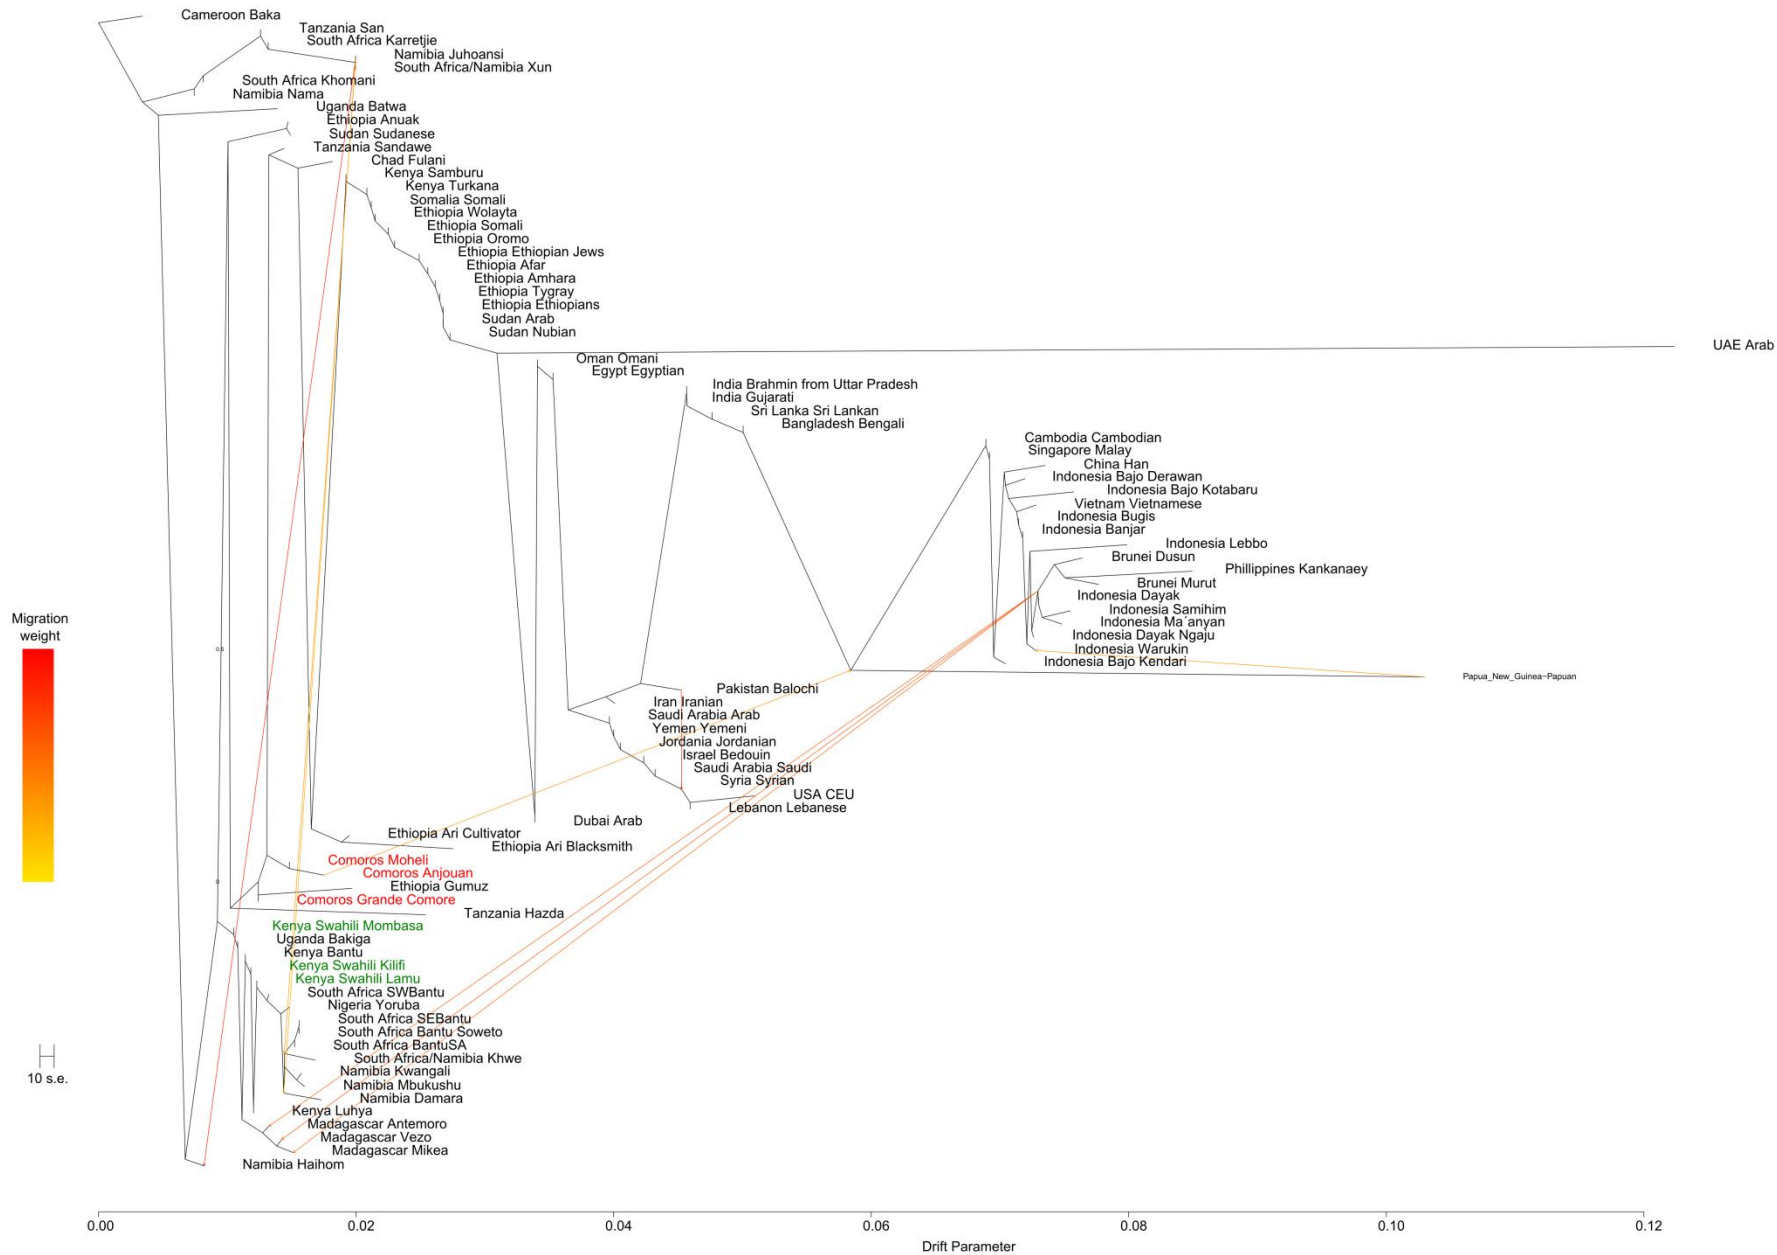

B.

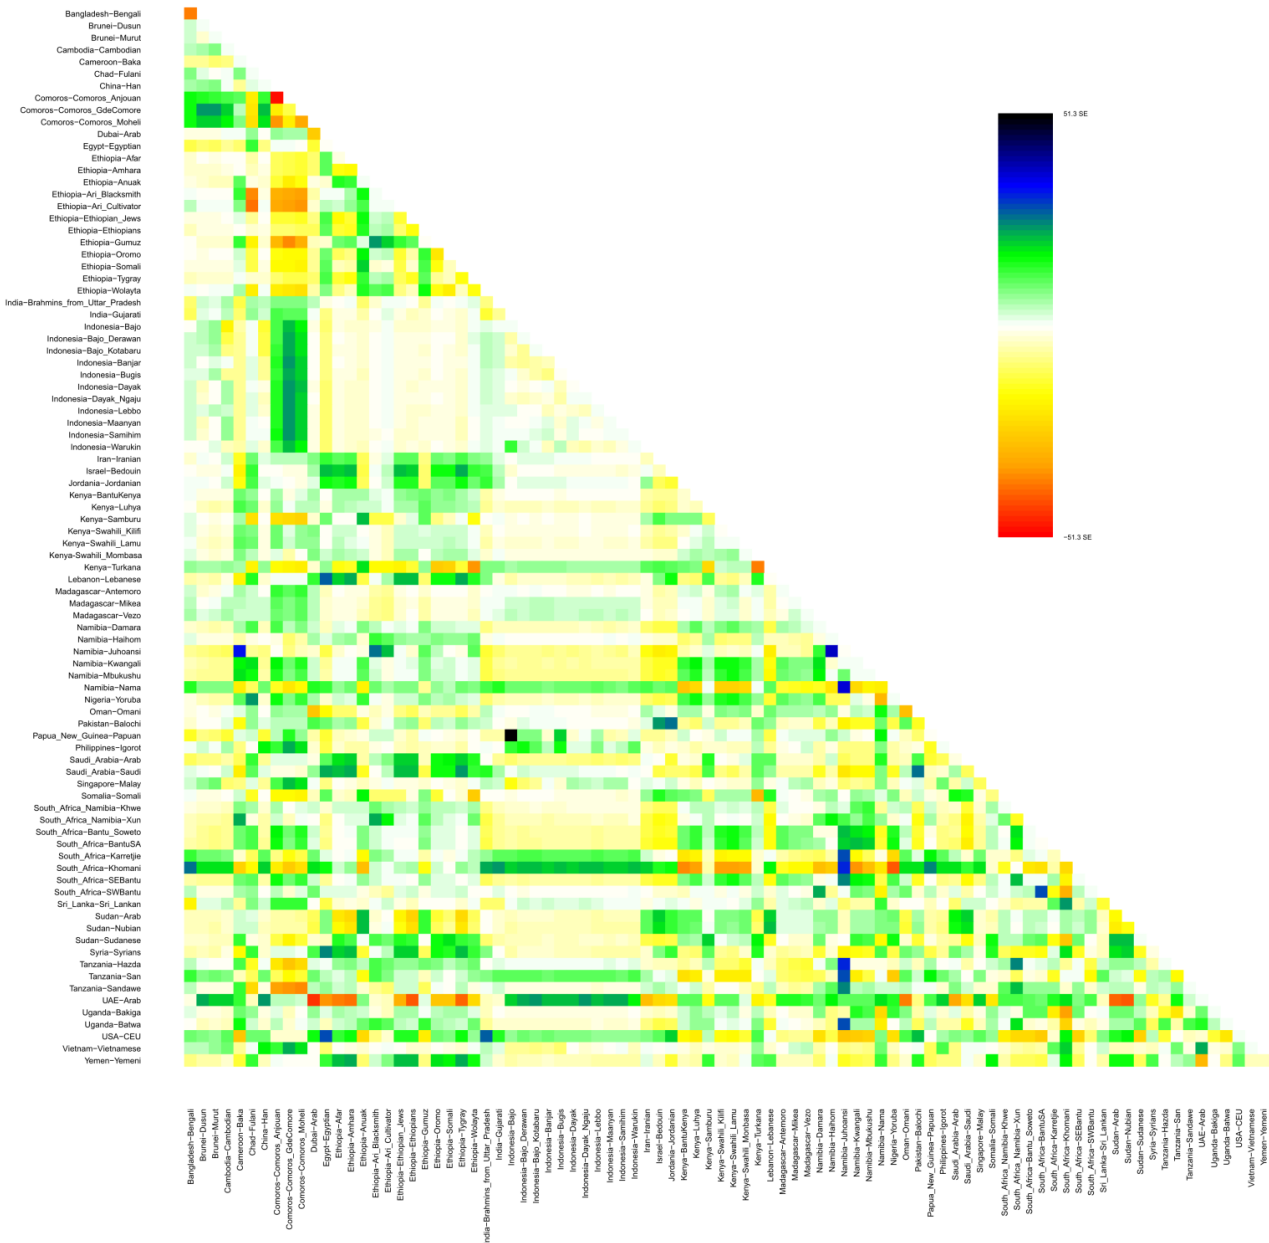

Figure S13. TREEMIX<sup>10</sup> plot of African and Asian populations in the low SNP-density dataset on 9 migration nodes (A), and its residual triangular matrix (B). Comorian populations are highlighted in red and Kenyan Swahili communities in green.

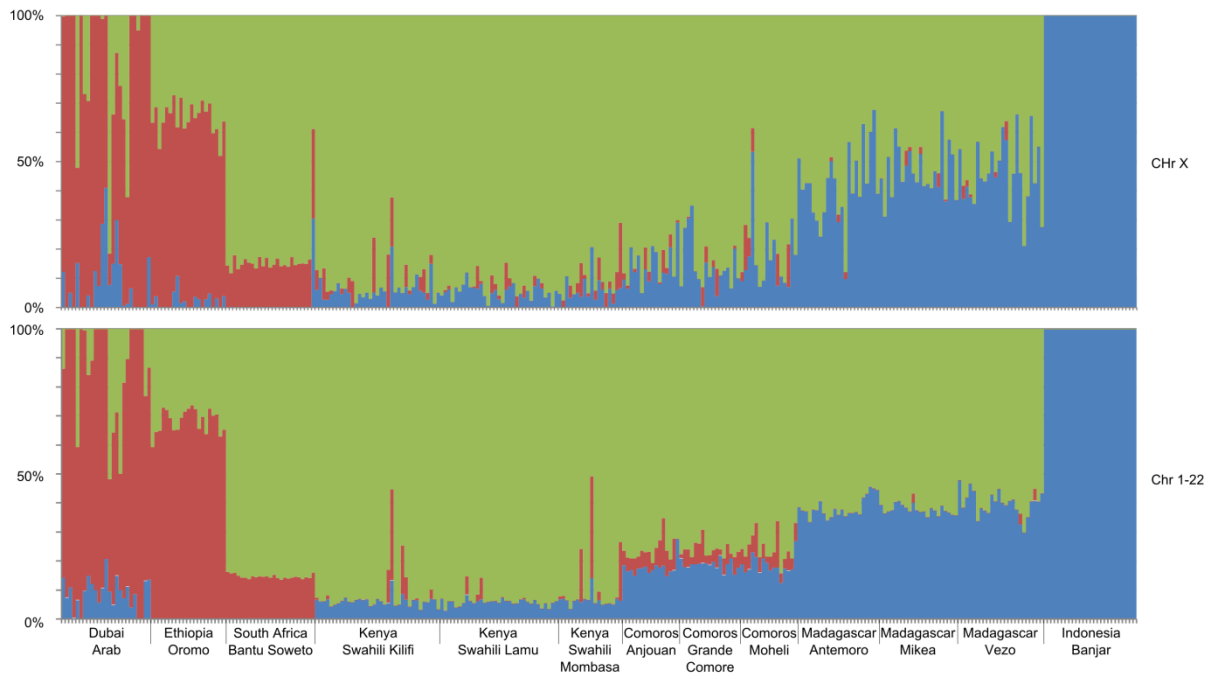

Figure S14. ADMIXTURE <sup>7</sup> plots obtained for chromosome X and autosomes at K=3. Each colored line is an individual whose genetic background can be decomposed into K genetic components.

|           | Swahili Kilifi | Swahili Lamu | Swahili Mombasa |
|-----------|----------------|--------------|-----------------|
| B2A       | 6              | 4            | 0               |
| B2B       | 3              | 1            | 0               |
| BT        | 2              | 7            | 0               |
| C         | 0              | 1            | 0               |
| E         | 0              | 3            | 0               |
| E1b1a1    | 1              | 0            | 0               |
| E1b1a7a   | 25             | 9            | 2               |
| E1b1a8a1a | 1              | 1            | 0               |
| E1b1a8a   | 16             | 16           | 2               |
| E1b1b1    | 2              | 1            | 1               |
| E2b       | 1              | 0            | 0               |
| G2a       | 1              | 0            | 0               |
| O2a       | 1              | 0            | 0               |
| R1b       | 1              | 0            | 0               |

Table S1. NRY haplogroups found in Swahili communities.

|           | Kenya Swahili Lamu | Kenya Swahili Kilifi | Kenya Swahili Mombasa | Comoros Grande Comore | Comoros Moheli | Comoros Anjouan |
|-----------|--------------------|----------------------|-----------------------|-----------------------|----------------|-----------------|
| F3b1b     |                    |                      |                       | 1                     |                |                 |
| H2a2a1    |                    |                      | 1                     |                       |                |                 |
| L0a       |                    | 3                    | 1                     |                       |                |                 |
| L0a1'4    | 1                  | 1                    | 1                     |                       |                |                 |
| L0a1a1    | 1                  |                      |                       |                       |                |                 |
| L0a1b1a1  |                    |                      |                       |                       | 1              |                 |
| L0a1b1a1a |                    | 1                    | 1                     |                       |                |                 |
| L0a1d     |                    |                      | 2                     |                       |                |                 |
| L0a2      |                    | 2                    | 1                     | 1                     |                |                 |
| L0a2a1a   |                    |                      |                       | 2                     |                |                 |
| L0a2a1b   |                    |                      | 2                     |                       |                |                 |
| L0a2a2a   | 14                 | 10                   | 4                     |                       | 5              | 1               |
| L0a2d     | 1                  |                      |                       |                       |                |                 |
| L0a3      |                    | 1                    |                       |                       |                |                 |
| L0d1c     | 1                  |                      |                       |                       |                |                 |
| L0d3      | 1                  |                      |                       |                       |                |                 |
| L0f       | 4                  |                      | 2                     |                       |                |                 |
| L0f1      |                    |                      | 2                     |                       |                |                 |
| L0f2a     | 5                  | 2                    |                       |                       |                |                 |
| L0f2a1    |                    | 1                    |                       |                       |                |                 |
| L0g       |                    |                      |                       |                       | 1              |                 |
| L0k2b     |                    |                      |                       |                       |                | 1               |
| L1b1a     | 7                  | 3                    |                       |                       |                |                 |
| L1b1a3    |                    | 2                    |                       |                       |                |                 |
| L1b2a     |                    | 1                    |                       |                       |                |                 |
| L1c1      | 1                  |                      | 1                     |                       |                |                 |
| L1c2a1    |                    | 8                    |                       |                       |                |                 |
| L1c2a1a   | 2                  |                      |                       | 1                     |                |                 |
| L1c2a3    |                    | 1                    | 1                     |                       |                |                 |
| L1c2b2    |                    |                      |                       | 1                     |                |                 |
| L1c3a     |                    |                      |                       | 1                     | 1              |                 |
| L1c3c     |                    |                      |                       |                       |                | 1               |
| L2a1      | 1                  |                      |                       |                       |                |                 |

|                 |   |    |   |   |   |   |
|-----------------|---|----|---|---|---|---|
| L2a1+143        |   | 2  |   |   |   |   |
| L2a1+143+@16309 | 1 |    |   |   |   |   |
| L2a1a           | 1 |    |   |   |   |   |
| L2a1a2          |   |    | 2 |   |   |   |
| L2a1b1a         | 4 | 3  |   |   | 2 | 2 |
| L2a1c4a1        | 1 |    |   |   |   |   |
| L2a1f           | 2 | 5  |   |   |   | 1 |
| L2a1f1          |   | 1  |   |   |   |   |
| L2a1f3          |   |    |   | 1 |   | 1 |
| L2a1g           |   |    |   |   |   | 1 |
| L2a1h           | 3 | 3  |   |   |   |   |
| L2a5            | 2 |    |   | 3 |   |   |
| L2b2a           |   | 1  |   |   |   |   |
| L2c2b1          |   |    |   | 1 |   |   |
| L2c2b1b         |   |    |   | 1 |   |   |
| L2d1a           |   |    | 1 |   |   |   |
| L3a1            |   | 1  |   |   |   |   |
| L3a2            | 1 |    |   |   |   |   |
| L3b1a11         |   |    | 1 |   |   |   |
| L3b1a1a         | 5 |    | 2 | 1 | 2 |   |
| L3b1a2          | 2 |    |   |   |   |   |
| L3d1a1a         | 9 | 5  | 1 |   |   |   |
| L3d1a1a1        | 3 | 5  |   | 3 |   |   |
| L3d1d           |   | 1  |   |   |   |   |
| L3e1a2          | 3 |    |   |   |   |   |
| L3e1d1          |   | 2  |   |   |   | 2 |
| L3e1e           | 1 | 1  |   |   |   |   |
| L3e1e1          | 1 | 1  |   |   |   |   |
| L3e2b           | 1 | 1  |   |   |   |   |
| L3e3a           | 6 | 10 | 4 | 2 | 2 |   |
| L3e3b2          |   |    |   |   |   | 1 |
| L3e5            |   | 1  |   |   |   |   |
| L3f             | 1 |    |   |   |   |   |
| L3f1b1a1        |   |    |   |   |   | 3 |
| L3f1b4a1        | 2 |    |   |   |   |   |
| L3f2a1          |   |    |   |   | 1 |   |
| L3h1a2a1        | 3 | 1  |   |   |   |   |
| L3h1b2          | 1 |    |   |   |   |   |
| L3h2            |   | 1  |   |   |   |   |
| L3x1a2          | 3 | 2  |   |   |   |   |
| L4b2a2          | 1 | 8  |   |   |   |   |
| L4b2a2c         | 1 |    |   |   |   |   |
| L5a1            | 1 |    |   |   |   |   |
| L5b2            | 1 |    |   |   |   |   |
| M               |   |    | 1 |   |   |   |
| M1a1            | 1 |    |   |   |   |   |
| M1a1b           |   | 1  |   |   |   |   |
| M1a1f           | 2 | 1  |   |   |   |   |
| M1a5            | 1 |    |   |   |   |   |
| R0+16189        | 1 |    |   |   |   |   |

Table S2. mtDNA haplogroups found in Swahili and Comorian communities.

| Population                      | N<br>LSD | N<br>HSD | Reference            |
|---------------------------------|----------|----------|----------------------|
| Cameroon Baka                   | 25       | 25       | <sup>12</sup>        |
| CAR Biaka Pygmy                 | 20       | -        | <sup>13</sup>        |
| DR Congo Mbuti Pygmy            | 13       | -        | <sup>13; 14</sup>    |
| Gabon Baka                      | 16       | 16       | <sup>12</sup>        |
| Burkina Faso Gurmantche         | 15       | 15       | <sup>15</sup>        |
| Burkina Faso Gurunsi            | 16       | 16       | <sup>15</sup>        |
| Burkina Faso Mossi              | 17       | 17       | <sup>15</sup>        |
| Cameroon Nzime                  | 25       | 25       | <sup>12</sup>        |
| Chad Daza                       | 18       | 18       | <sup>15</sup>        |
| Chad Fulani                     | 13       | 13       | <sup>15</sup>        |
| Chad Kanembu                    | 4        | 4        | <sup>15</sup>        |
| Gabon Bongo                     | 25       | 25       | <sup>12</sup>        |
| Gabon Nzebi                     | 20       | 20       | <sup>12</sup>        |
| Gambia Gambian                  | 25       | 25       | <sup>16</sup>        |
| Nigeria Esan                    | 25       | 25       | <sup>14; 16</sup>    |
| Nigeria Yoruba                  | 25       | 19       | <sup>13; 16</sup>    |
| Senegal Mandenka                | 22       | -        | <sup>13</sup>        |
| Sierra Leone Mende              | 25       | 25       | <sup>13; 16</sup>    |
| Botswana GuiGhanaKgal           | 14       | -        | <sup>17</sup>        |
| Madagascar Antemoro             | 24       | 24       | <sup>18</sup>        |
| Madagascar Mikea                | 18       | 18       | <sup>18</sup>        |
| Madagascar Vezo                 | 24       | 24       | <sup>18</sup>        |
| Namibia Damara                  | 8        | 8        | <sup>19</sup>        |
| Namibia Haihom                  | 8        | 8        | <sup>19</sup>        |
| Namibia Juhoansi                | 18       | -        | <sup>17</sup>        |
| Namibia Kwangali                | 7        | 7        | <sup>19</sup>        |
| Namibia Mbukushu                | 8        | 8        | <sup>19</sup>        |
| Namibia Nama                    | 20       | -        | <sup>17</sup>        |
| South Africa Namibia Khwe       | 17       | -        | <sup>17</sup>        |
| South Africa Namibia Xun        | 19       | -        | <sup>17</sup>        |
| South Africa Bantu Soweto       | 25       | 25       | <sup>20</sup>        |
| South Africa BantuSA            | 8        | -        | <sup>13</sup>        |
| South Africa ColouredColesberg  | 20       | -        | <sup>17</sup>        |
| South Africa ColouredWellington | 20       | -        | <sup>17</sup>        |
| South Africa Karretjie          | 20       | -        | <sup>17</sup>        |
| South Africa Khomani            | 25       | -        | <sup>17</sup>        |
| South Africa SEBantu            | 20       | -        | <sup>17</sup>        |
| South Africa SWBantu            | 12       | -        | <sup>17</sup>        |
| Comoros Anjouan                 | 16       | 16       | <i>Present study</i> |
| Comoros Grande Comore           | 17       | 17       | <i>Present study</i> |
| Comoros Moheli                  | 15       | 15       | <i>Present study</i> |
| Ethiopia Afar                   | 12       | 12       | <sup>21</sup>        |
| Ethiopia Amhara                 | 25       | 19       | <sup>22</sup>        |



|                            |    |    |                               |
|----------------------------|----|----|-------------------------------|
| Ethiopia Anuak             | 23 | 23 | 21                            |
| Ethiopia Ari Blacksmith    | 15 | 15 | 21                            |
| Ethiopia Ari Cultivator    | 24 | 24 | 21                            |
| Ethiopia Ethiopian Jews    | 12 | -  | 22                            |
| Ethiopia Ethiopians        | 5  | -  | 22                            |
| Ethiopia Gumuz             | 19 | 19 | 21                            |
| Ethiopia Oromo             | 25 | 20 | 15; 21; 22                    |
| Ethiopia Somali            | 17 | 17 | 21                            |
| Ethiopia Tygray            | 21 | 21 | 21                            |
| Ethiopia Wolayta           | 8  | 8  | 21                            |
| Kenya BantuKenya           | 10 | -  | 13; 14                        |
| Kenya Luhya                | 25 | 25 | 13; 16                        |
| Kenya Samburu              | 10 | 10 | 15                            |
| Kenya Swahili Kilifi       | 25 | 25 | <i>Present study</i>          |
| Kenya Swahili Lamu         | 25 | 25 | <i>Present study</i>          |
| Kenya Swahili Mombasa      | 22 | 22 | <i>Present study</i>          |
| Kenya Turkana              | 8  | 8  | 15                            |
| Somalia Somali             | 26 | 26 | 15; 21                        |
| Sudan Arab                 | 16 | 16 | 15                            |
| Sudan Nubian               | 14 | 14 | 15                            |
| Sudan Sudanese             | 22 | 22 | 21                            |
| Tanzania Hazda             | 14 | -  | 14                            |
| Tanzania San               | 26 | -  | 14                            |
| Tanzania Sandawe           | 25 | -  | 14                            |
| Uganda Bakiga              | 25 | 25 | 12                            |
| Uganda Batwa               | 24 | 24 | 12                            |
| Algeria Mozabite           | 25 | -  | 13                            |
| Egypt Egyptian             | 12 | -  | 22                            |
| Lybia Lybian Jew           | 6  | -  | 23                            |
| Morocco Moroccan           | 25 | -  | 22; 24                        |
| Tunisia Tunisian           | 11 | -  | 24                            |
| UAE Dubai Arab             | 25 | 25 | Fernandes et al., unpublished |
| Irak Kurd Jew              | 8  | -  | 23                            |
| Iraq Iraqi Jews            | 10 | -  | 22                            |
| Israel Bedouin             | 25 | -  | 13                            |
| Israel Druze               | 25 | -  | 13                            |
| Israel Palestinian         | 25 | -  | 13                            |
| Jordania Jordanian         | 20 | -  | 13                            |
| Lebanon Lebanese           | 8  | -  | 22                            |
| Lebanon Lebanese Christian | 25 | -  | 25                            |
| Lebanon Lebanese Druze     | 25 | -  | 25                            |
| Lebanon Lebanese Muslim    | 25 | -  | 25                            |
| Oman Omani                 | 25 | 25 | Fernandes et al., unpublished |
| Saudi Arabia Arab          | 25 | 25 | Fernandes et al., unpublished |
| Saudi Arabia Saudi         | 20 | -  | 22                            |

|                                   |    |    |                                       |
|-----------------------------------|----|----|---------------------------------------|
| Syria Syrians                     | 16 | -  | 22                                    |
| Turkey Turks                      | 17 | -  | 22                                    |
| UAE Arab                          | 14 | -  | 24                                    |
| Yemen Yemeni                      | 26 | 25 | Fernandes et al., unpublished         |
| Yemen Yemenite Jews               | 15 | -  | 22                                    |
| Armenia Armenian                  | 25 | -  | 13; 22; 26                            |
| Georgia Abkhasian                 | 23 | -  | 23                                    |
| Georgia Balkar                    | 13 | -  | 23                                    |
| Georgia Chechen                   | 11 | -  | 26                                    |
| Georgia Georgian                  | 25 | -  | 13; 22                                |
| Iran Azeri                        | 18 | -  | 26                                    |
| Iran Iranian                      | 25 | 20 | 13; 22, Fernandes et al., unpublished |
| Iran Iranian Jew                  | 10 | -  | 23                                    |
| Kazakhstan Kurd                   | 6  | -  | 26                                    |
| Turkmenistan Turkmen              | 11 | -  | 26                                    |
| China Dai                         | 25 | 22 | 16                                    |
| China Han                         | 25 | 17 | 13; 16                                |
| Burma Burmese                     | 20 | 20 | 27                                    |
| Cambodia Cambodian                | 10 | -  | 13                                    |
| Vietnam Kinh                      | 25 | 25 | 16                                    |
| Vietnam Vietnamese                | 18 | 18 | 27                                    |
| Brunei Dusun                      | 22 | 22 | 27                                    |
| Brunei Murut                      | 18 | 18 | 27                                    |
| Indonesia Bajo                    | 25 | 25 | 27                                    |
| Indonesia Bajo Derawan            | 16 | 16 | 28                                    |
| Indonesia Bajo Kotabaru           | 22 | 22 | 28                                    |
| Indonesia Banjar                  | 25 | 25 | 28; 29                                |
| Indonesia Bugis                   | 25 | 25 | 28                                    |
| Indonesia Dayak                   | 25 | 25 | 30                                    |
| Indonesia Dayak Ngaju             | 22 | 22 | 29                                    |
| Indonesia Lebbo                   | 15 | 15 | 27                                    |
| Indonesia Ma'anyan                | 25 | 25 | 30                                    |
| Indonesia Samihim                 | 25 | 25 | 28                                    |
| Indonesia Warukin                 | 20 | 20 | 28                                    |
| Malaysia Malay                    | 24 | -  | 27                                    |
| Philippines Igorot                | 21 | 21 | 27                                    |
| Singapore Malay                   | 25 | 25 | 31                                    |
| Papua New Guinea Papuan           | 14 | -  | 13                                    |
| Bangladesh Bengali                | 25 | 25 | 16                                    |
| India Birhor                      | 12 | -  | 32                                    |
| India Brahmin                     | 25 | 25 | 27                                    |
| India Brahmins from Uttar Pradesh | 7  | -  | 33                                    |
| India Chamar                      | 10 | -  | 33                                    |

|                                        |    |    |    |
|----------------------------------------|----|----|----|
| India Dharkar                          | 11 | -  | 33 |
| India Dusadh                           | 6  | -  | 33 |
| India Gond                             | 24 | -  | 33 |
| India Gujarat Brahmin                  | 19 | -  | 32 |
| India Gujarati                         | 25 | 25 | 16 |
| India Ho                               | 18 | -  | 32 |
| India Indian                           | 25 | 25 | 16 |
| India Irula                            | 19 | -  | 32 |
| India Iyer                             | 20 | -  | 32 |
| India Jamatia                          | 18 | -  | 32 |
| India Jarawa                           | 7  | -  | 32 |
| India Kadar                            | 19 | -  | 32 |
| India Kanjars                          | 8  | -  | 33 |
| India Khatri                           | 17 | -  | 32 |
| India Kol                              | 15 | -  | 33 |
| India Korva                            | 18 | -  | 32 |
| India Kshatriya                        | 7  | -  | 33 |
| India Manipuri Brahmin                 | 20 | -  | 32 |
| India Maratha                          | 7  | -  | 32 |
| India Muslim                           | 5  | -  | 33 |
| India North Kannadi                    | 8  | -  | 22 |
| India Onge                             | 6  | -  | 32 |
| India Palian                           | 20 | -  | 32 |
| India Paniya                           | 20 | -  | 22 |
| India Piramalai Kallar                 | 8  | -  | 33 |
| India Pulliyar                         | 4  | -  | 33 |
| India Punjabi                          | 25 | 25 | 16 |
| India Santal                           | 20 | -  | 32 |
| India Tharu                            | 21 | -  | 33 |
| India Tripuri                          | 19 | -  | 32 |
| India Uttar Pradesh<br>Scheduled Caste | 5  | -  | 33 |
| India Velama                           | 10 | -  | 33 |
| India West Bengal Brahmin              | 18 | -  | 32 |
| Pakistan Balochi                       | 21 | -  | 13 |
| Pakistan Brahui                        | 23 | -  | 13 |
| Pakistan Burusho                       | 25 | -  | 13 |
| Pakistan Hazara                        | 18 | -  | 13 |
| Pakistan Kalash                        | 23 | -  | 13 |
| Pakistan Makrani                       | 22 | -  | 13 |
| Pakistan Pathan                        | 22 | -  | 13 |
| Pakistan Punjabi                       | 8  | 8  | 13 |
| Pakistan Sindhi                        | 22 | -  | 13 |
| Sri Lanka Sri Lankan                   | 25 | 25 | 16 |
| Bulgaria Bulgarian                     | 25 | -  | 24 |

|                       |      |      |            |
|-----------------------|------|------|------------|
| Croatia Croatian      | 24   | -    | 23         |
| Cyprus Cypriot        | 12   | -    | 22         |
| Greece Greek          | 25   | -    | 23; 24     |
| Romania Romanian      | 16   | -    | 22         |
| France French         | 25   | -    | 13         |
| Hungary Hungarian     | 19   | -    | 22         |
| Italy East Sicilian   | 10   | -    | 24         |
| Italy Italian Abruzzo | 11   | -    | 23         |
| Italy Italian Bergamo | 12   | -    | 13         |
| Italy Sardinian       | 25   | -    | 13         |
| Italy Sicilian        | 13   | -    | 23         |
| Italy South Italian   | 18   | -    | 24         |
| Italy Tuscan          | 25   | 25   | 16         |
| Italy West Sicilian   | 10   | -    | 24         |
| Spain Spanish         | 25   | 25   | 16; 22; 24 |
| Russia Azeri          | 5    | -    | 26         |
| USA CEU               | 25   | 25   | 16         |
| Total                 | 3477 | 1664 |            |

Table S3. Datasets used in the present study. LSD: Low SNP-density database HSD: High SNP-density database.

| Population                                         | N   | Reference            |
|----------------------------------------------------|-----|----------------------|
| Bangladesh Bengali                                 | 86  | <sup>16</sup>        |
| China Dai                                          | 99  | <sup>16</sup>        |
| China Han Beijing                                  | 103 | <sup>16</sup>        |
| China Han South                                    | 108 | <sup>16</sup>        |
| Comoros Comorian                                   | 577 | <sup>4</sup>         |
| Egypt Arab                                         | 74  | <sup>34</sup>        |
| Ethiopia Amharic                                   | 190 | <sup>35</sup>        |
| Ethiopia Misc.                                     | 20  | <sup>35</sup>        |
| Ethiopia Somali                                    | 3   | <sup>36</sup>        |
| India Gujarati                                     | 103 | <sup>16</sup>        |
| India Punjab                                       | 97  | <sup>16</sup>        |
| India Telugu                                       | 103 | <sup>16</sup>        |
| Indonesia Bajo                                     | 27  | <sup>37</sup>        |
| Indonesia Bali                                     | 487 | <sup>37; 38</sup>    |
| Indonesia Java                                     | 51  | <sup>37; 38</sup>    |
| Indonesia Ma'anyan                                 | 159 | <sup>37</sup>        |
| Indonesia Dayak                                    | 64  | <sup>37</sup>        |
| Japan Japanese                                     | 104 | <sup>16</sup>        |
| Kenya Swahili Kilifi                               | 95  | <i>present study</i> |
| Kenya Swahili Lamu                                 | 107 | <i>present study</i> |
| Kenya Swahili Mombasa                              | 33  | <i>present study</i> |
| Kenya Kenya Misc.                                  | 3   | <sup>39</sup>        |
| Kenya Kikuyu                                       | 23  | <sup>36</sup>        |
| Kenya Somali                                       | 14  | <sup>36</sup>        |
| Kenya Swahili (2)                                  | 174 | <sup>40</sup>        |
| Kenya Turkana                                      | 34  | <sup>36</sup>        |
| Madagascar Antaisakaa                              | 5   | <sup>41</sup>        |
| Madagascar Antandroya                              | 19  | <sup>41</sup>        |
| Madagascar Antanosya                               | 21  | <sup>41</sup>        |
| Madagascar Madagascar Misc.                        | 33  | <sup>42</sup>        |
| Madagascar Merinaa                                 | 6   | <sup>41</sup>        |
| Madagascar Sihanaka Merina Betsileo<br>Bezanozanob | 19  | <sup>41</sup>        |
| Mozambique Misc.                                   | 258 | <sup>43</sup>        |
| Rwanda Bantu                                       | 40  | <sup>44</sup>        |
| Rwanda Hutu                                        | 97  | <sup>45</sup>        |
| Somalia Somali                                     | 1   | <sup>36</sup>        |
| South Africa !Xun Khwe                             | 25  | <sup>46</sup>        |
| South Africa bantu                                 | 2   | <sup>47</sup>        |
| South Africa khoisan                               | 2   | <sup>47</sup>        |
| South Africa Khwe                                  | 10  | <sup>48</sup>        |
| South Africa Kung                                  | 57  | <sup>48</sup>        |
| South Africa Misc.                                 | 3   | <sup>49</sup>        |
| Sri Lanka Tamil                                    | 102 | <sup>16</sup>        |

|                  |     |               |
|------------------|-----|---------------|
| Sudan Dinka      | 36  | <sup>34</sup> |
| Sudan Nubia      | 76  | <sup>34</sup> |
| Sudan Nuer       | 8   | <sup>34</sup> |
| Sudan Shilluk    | 6   | <sup>34</sup> |
| Tanzania Burunge | 36  | <sup>46</sup> |
| Tanzania Datog   | 35  | <sup>46</sup> |
| Tanzania Datoga  | 17  | <sup>50</sup> |
| Tanzania Hadza   | 24  | <sup>46</sup> |
| Tanzania Hadzabe | 13  | <sup>50</sup> |
| Tanzania Iraqw   | 10  | <sup>50</sup> |
| Tanzania Sandawe | 80  | <sup>46</sup> |
| Tanzania Sukuma  | 29  | <sup>46</sup> |
| Tanzania Turu    | 28  | <sup>46</sup> |
| USA European     | 99  | <sup>16</sup> |
| Vietnam Kinh     | 101 | <sup>16</sup> |
| Zimbabwe Shona   | 45  | <sup>45</sup> |

Table S4. mtDNA haplogroup dataset, based on the D-loop, used in the present study.

| Population                | N   | Reference            |
|---------------------------|-----|----------------------|
| Bangladesh Bengali        | 40  | <sup>16</sup>        |
| China Dai                 | 40  | <sup>16</sup>        |
| China Han Beijing         | 41  | <sup>16</sup>        |
| China Han South           | 50  | <sup>16</sup>        |
| Comoros Comorian          | 370 | <sup>4</sup>         |
| Egypt Arab                | 97  | <sup>51</sup>        |
| Egypt Misc.               | 94  | <sup>52</sup>        |
| Ethiopia Amhara           | 48  | <sup>53</sup>        |
| Ethiopia Jew              | 101 | <sup>54</sup>        |
| Ethiopia Oromo            | 78  | <sup>53</sup>        |
| Ethiopia South Semitic    | 20  | <sup>52</sup>        |
| India Gujarati            | 58  | <sup>16</sup>        |
| India Punjab              | 48  | <sup>16</sup>        |
| India Telugu              | 60  | <sup>16</sup>        |
| Indonesia Bajo            | 27  | <sup>37</sup>        |
| Indonesia Bali            | 634 | <sup>37; 38</sup>    |
| Indonesia Java            | 61  | <sup>37; 38</sup>    |
| Indonesia Ma'anyan        | 159 | <sup>37</sup>        |
| Indonesia Dayak           | 85  | <sup>37</sup>        |
| Japan Japanese            | 56  | <sup>16</sup>        |
| Kenya Bantu               | 81  | <sup>51</sup>        |
| Kenya Kikuyu Kamba        | 44  | <sup>52</sup>        |
| Kenya Luo                 | 9   | <sup>52</sup>        |
| Kenya Masai               | 26  | <sup>52</sup>        |
| Kenya Swahili Kilifi      | 60  | <i>present study</i> |
| Kenya Swahili Lamu        | 44  | <i>present study</i> |
| Kenya Swahili Mombasa     | 5   | <i>present study</i> |
| Madagascar Antaisaka      | 8   | <sup>41</sup>        |
| Madagascar Antandroy      | 46  | <sup>41</sup>        |
| Madagascar Antanosy       | 46  | <sup>41</sup>        |
| Madagascar Merina         | 9   | <sup>41</sup>        |
| Mozambique Misc.          | 43  | <sup>55</sup>        |
| Oman Arab                 | 91  | <sup>51</sup>        |
| Rwanda Hutu               | 98  | <sup>51</sup>        |
| Rwanda Tutsi              | 100 | <sup>51</sup>        |
| Somalia Misc.Danish       | 196 | <sup>56</sup>        |
| South Africa !Kung        | 100 | <sup>54</sup>        |
| South Africa Khwe         | 101 | <sup>54</sup>        |
| South Africa Sotho-Tswana | 29  | <sup>52</sup>        |
| South Africa Xhosa        | 79  | <sup>52</sup>        |
| South Africa Zulu         | 29  | <sup>52</sup>        |
| Sri Lanka Tamil           | 55  | <sup>16</sup>        |
| Sudan Arakien             | 24  | <sup>57</sup>        |
| Sudan Beja                | 42  | <sup>57</sup>        |

|                  |     |    |
|------------------|-----|----|
| Sudan Borgu      | 26  | 57 |
| Sudan Copte      | 33  | 57 |
| Sudan Dinka      | 26  | 57 |
| Sudan Fulani     | 26  | 57 |
| Sudan Fur        | 32  | 57 |
| Sudan Gaalien    | 50  | 57 |
| Sudan Hausa      | 32  | 57 |
| Sudan Masalit    | 32  | 57 |
| Sudan Meseria    | 28  | 57 |
| Sudan Nuba       | 28  | 57 |
| Sudan Nubian     | 39  | 57 |
| Sudan Nuer       | 12  | 57 |
| Sudan Shilluk    | 15  | 57 |
| Tanzania Burunge | 31  | 46 |
| Tanzania Datog   | 31  | 46 |
| Tanzania Datoga  | 101 | 50 |
| Tanzania Hadza   | 54  | 46 |
| Tanzania Hadzabe | 99  | 50 |
| Tanzania Iraqw   | 100 | 50 |
| Tanzania Mbugwe  | 14  | 46 |
| Tanzania Sandawe | 75  | 46 |
| Tanzania Sukuma  | 130 | 46 |
| Tanzania Turu    | 17  | 46 |
| Tanzania Wairak  | 100 | 51 |
| Uganda Ganda     | 26  | 52 |
| USA European     | 49  | 16 |
| Vietnam Kinh     | 44  | 16 |
| Zimbabwe Shona   | 49  | 52 |

Table S5. NRY haplogroup dataset used in the present study.



|                                                 | Comoros Comorian |                      | Kenya Swahili Kilifi |                      | Kenya Swahili Lamu |                      | Kenya Swahili Mombasa |                      |
|-------------------------------------------------|------------------|----------------------|----------------------|----------------------|--------------------|----------------------|-----------------------|----------------------|
|                                                 | FST              | P                    | FST                  | P                    | FST                | P                    | FST                   | P                    |
| Egypt Arab                                      | 0.12212          | 0.00000 +-<br>0.0000 | 0.10684              | 0.00000 +-<br>0.0000 | 0.13284            | 0.00000 +-<br>0.0000 | 0.16927               | 0.00000 +-<br>0.0000 |
| Ethiopia Amharic                                | 0.09309          | 0.00000 +-<br>0.0000 | 0.08001              | 0.00000 +-<br>0.0000 | 0.09664            | 0.00000 +-<br>0.0000 | 0.13876               | 0.00000 +-<br>0.0000 |
| Ethiopia Misc.                                  | 0.22634          | 0.00000 +-<br>0.0000 | 0.22338              | 0.00000 +-<br>0.0000 | 0.25987            | 0.00000 +-<br>0.0000 | 0.31933               | 0.00000 +-<br>0.0000 |
| Somalia Ethiopia Somali                         | -0.02083         | 0.50450 +-<br>0.0433 | -0.06107             | 0.74775 +-<br>0.0305 | -0.07578           | 0.65766 +-<br>0.0451 | -0.06837              | 0.63964 +-<br>0.0317 |
| Kenya Kenya Misc.                               | -0.02083         | 0.48649 +-<br>0.0364 | -0.06107             | 0.77477 +-<br>0.0454 | -0.07578           | 0.62162 +-<br>0.0394 | -0.06837              | 0.68468 +-<br>0.0364 |
| Kenya Kikuyu                                    | 0.07339          | 0.00000 +-<br>0.0000 | 0.06142              | 0.00000 +-<br>0.0000 | 0.07216            | 0.02703 +-<br>0.0194 | 0.13688               | 0.00000 +-<br>0.0000 |
| Kenya Somali                                    | 0.12860          | 0.00000 +-<br>0.0000 | 0.10814              | 0.00000 +-<br>0.0000 | 0.14358            | 0.00000 +-<br>0.0000 | 0.21749               | 0.00000 +-<br>0.0000 |
| Kenya Swahili 2                                 | 0.04753          | 0.00000 +-<br>0.0000 | 0.03326              | 0.00000 +-<br>0.0000 | 0.03056            | 0.00000 +-<br>0.0000 | 0.09027               | 0.00000 +-<br>0.0000 |
| Kenya Turkana                                   | 0.06750          | 0.00000 +-<br>0.0000 | 0.05485              | 0.00000 +-<br>0.0000 | 0.06324            | 0.00000 +-<br>0.0000 | 0.13269               | 0.00000 +-<br>0.0000 |
| Madagascar Antaisakaa                           | 0.19879          | 0.00000 +-<br>0.0000 | 0.21567              | 0.00901 +-<br>0.0091 | 0.25067            | 0.00901 +-<br>0.0091 | 0.32215               | 0.00000 +-<br>0.0000 |
| Madagascar Antandroya                           | 0.02861          | 0.11712 +-<br>0.0194 | 0.03617              | 0.05405 +-<br>0.0201 | 0.03522            | 0.06306 +-<br>0.0194 | 0.11984               | 0.00000 +-<br>0.0000 |
| Madagascar Antanosya                            | 0.12282          | 0.00000 +-<br>0.0000 | 0.14376              | 0.00000 +-<br>0.0000 | 0.16905            | 0.00000 +-<br>0.0000 | 0.23863               | 0.00000 +-<br>0.0000 |
| Madagascar Madagascar Misc.                     | 0.03439          | 0.00000 +-<br>0.0000 | 0.06631              | 0.00000 +-<br>0.0000 | 0.07984            | 0.00000 +-<br>0.0000 | 0.18291               | 0.00000 +-<br>0.0000 |
| Madagascar Merinaa                              | 0.05683          | 0.10811 +-<br>0.0264 | 0.11265              | 0.01802 +-<br>0.0121 | 0.14599            | 0.03604 +-<br>0.0201 | 0.24839               | 0.01802 +-<br>0.0121 |
| Madagascar Sihanaka Merina Betsileo Bezanozanob | 0.06955          | 0.01802 +-<br>0.0121 | 0.12519              | 0.00000 +-<br>0.0000 | 0.15322            | 0.00000 +-<br>0.0000 | 0.25399               | 0.00000 +-<br>0.0000 |
| Mozambique Mozambique Misc.                     | 0.13048          | 0.00000 +-<br>0.0000 | 0.12762              | 0.00000 +-<br>0.0000 | 0.12916            | 0.00000 +-<br>0.0000 | 0.18369               | 0.00000 +-<br>0.0000 |
| Rwanda Bantu                                    | 0.01669          | 0.06306 +-<br>0.0194 | 0.02937              | 0.02703 +-<br>0.0139 | 0.04494            | 0.00000 +-<br>0.0000 | 0.12748               | 0.00000 +-<br>0.0000 |
| Rwanda Hutu                                     | 0.02870          | 0.00000 +-<br>0.0000 | 0.01835              | 0.05405 +-<br>0.0242 | 0.02153            | 0.03604 +-<br>0.0148 | 0.04946               | 0.00000 +-<br>0.0000 |
| SouthAfrica !XunKhwe                            | 0.30937          | 0.00000 +-<br>0.0000 | 0.32025              | 0.00000 +-<br>0.0000 | 0.34563            | 0.00000 +-<br>0.0000 | 0.41410               | 0.00000 +-<br>0.0000 |
| SouthAfrica bantu                               | 0.13482          | 0.13514 +-<br>0.0412 | 0.16206              | 0.09009 +-<br>0.0303 | 0.20652            | 0.03604 +-<br>0.0148 | 0.28251               | 0.00901 +-<br>0.0091 |
| SouthAfrica khoisan                             | 0.13150          | 0.09009 +-<br>0.0192 | 0.16206              | 0.10811 +-<br>0.0297 | 0.20255            | 0.03604 +-<br>0.0201 | 0.28251               | 0.00901 +-<br>0.0091 |
| SouthAfrica Khwe                                | 0.28534          | 0.00000 +-<br>0.0000 | 0.25074              | 0.00000 +-<br>0.0000 | 0.23369            | 0.00000 +-<br>0.0000 | 0.10582               | 0.09009 +-<br>0.0235 |
| SouthAfrica Kung                                | 0.16380          | 0.00000 +-<br>0.0000 | 0.15260              | 0.00000 +-<br>0.0000 | 0.15422            | 0.00000 +-<br>0.0000 | 0.19110               | 0.00000 +-<br>0.0000 |
| SouthAfrica Misc.                               | -0.02083         | 0.49550 +-<br>0.0434 | -0.06107             | 0.69369 +-<br>0.0385 | -0.07578           | 0.66667 +-<br>0.0389 | -0.06837              | 0.65766 +-<br>0.0490 |
| Sudan Dinka                                     | 0.06738          | 0.00000 +-<br>0.0000 | 0.05103              | 0.00901 +-<br>0.0091 | 0.05356            | 0.00000 +-<br>0.0000 | 0.11530               | 0.00000 +-<br>0.0000 |
| Sudan Nubia                                     | 0.08044          | 0.00000 +-<br>0.0000 | 0.06538              | 0.00000 +-<br>0.0000 | 0.09050            | 0.00000 +-<br>0.0000 | 0.14232               | 0.00000 +-<br>0.0000 |
| Sudan Nuer                                      | 0.01263          | 0.31532 +-<br>0.0654 | 0.02378              | 0.19820 +-<br>0.0466 | 0.03344            | 0.21622 +-<br>0.0309 | 0.14289               | 0.00901 +-<br>0.0091 |
| Sudan Shilluk                                   | 0.05621          | 0.13514 +-<br>0.0203 | 0.04814              | 0.18018 +-<br>0.0359 | 0.07037            | 0.14414 +-<br>0.0242 | 0.17692               | 0.00901 +-<br>0.0091 |
| Tanzania Burunge                                | 0.09099          | 0.00000 +-<br>0.0000 | 0.05473              | 0.00000 +-<br>0.0000 | 0.06695            | 0.00901 +-<br>0.0091 | 0.06233               | 0.00000 +-<br>0.0000 |
| Tanzania Datog                                  | 0.15665          | 0.00000 +-<br>0.0000 | 0.14592              | 0.00000 +-<br>0.0000 | 0.16387            | 0.00000 +-<br>0.0000 | 0.22336               | 0.00000 +-<br>0.0000 |
| Tanzania Datoga                                 | 0.07724          | 0.00000 +-<br>0.0000 | 0.07069              | 0.02703 +-<br>0.0139 | 0.07258            | 0.00000 +-<br>0.0000 | 0.18643               | 0.00000 +-<br>0.0000 |
| Tanzania Hadza                                  | 0.08148          | 0.00000 +-<br>0.0000 | 0.07875              | 0.00000 +-<br>0.0000 | 0.11482            | 0.00000 +-<br>0.0000 | 0.18562               | 0.00000 +-<br>0.0000 |
| Tanzania Hadzabe                                | 0.23082          | 0.00000 +-<br>0.0000 | 0.20826              | 0.00000 +-<br>0.0000 | 0.24851            | 0.00000 +-<br>0.0000 | 0.32232               | 0.00000 +-<br>0.0000 |

|                       |         |                      |          |                      |          |                      |         |                      |
|-----------------------|---------|----------------------|----------|----------------------|----------|----------------------|---------|----------------------|
| Tanzania Iraqw        | 0.08203 | 0.04505 +-<br>0.0203 | 0.08012  | 0.03604 +-<br>0.0201 | 0.08200  | 0.02703 +-<br>0.0139 | 0.19323 | 0.00000 +-<br>0.0000 |
| Tanzania Sandawe      | 0.11053 | 0.00000 +-<br>0.0000 | 0.10376  | 0.00000 +-<br>0.0000 | 0.09470  | 0.00000 +-<br>0.0000 | 0.20716 | 0.00000 +-<br>0.0000 |
| Tanzania Sukuma       | 0.08115 | 0.00000 +-<br>0.0000 | 0.07576  | 0.00000 +-<br>0.0000 | 0.08318  | 0.00000 +-<br>0.0000 | 0.17356 | 0.00000 +-<br>0.0000 |
| Tanzania Turu         | 0.02446 | 0.04505 +-<br>0.0152 | 0.00625  | 0.30631 +-<br>0.0473 | 0.01873  | 0.11712 +-<br>0.0305 | 0.07053 | 0.02703 +-<br>0.0139 |
| Zimbabwe Shona        | 0.09762 | 0.00000 +-<br>0.0000 | 0.08754  | 0.00000 +-<br>0.0000 | 0.08351  | 0.00901 +-<br>0.0091 | 0.13600 | 0.00000 +-<br>0.0000 |
| Comoros Comorian      | 0.00000 | *                    | 0.01284  | 0.01802 +-<br>0.0121 | 0.02147  | 0.00000 +-<br>0.0000 | 0.08640 | 0.00000 +-<br>0.0000 |
| Kenya Swahili Kilifi  | 0.01284 | 0.01802 +-<br>0.0121 | 0.00000  | *                    | -0.00160 | 0.45045 +-<br>0.0489 | 0.04976 | 0.00000 +-<br>0.0000 |
| Kenya Swahili Lamu    | 0.02147 | 0.00000 +-<br>0.0000 | -0.00160 | 0.45045 +-<br>0.0489 | 0.00000  | *                    | 0.02873 | 0.01802 +-<br>0.0121 |
| Kenya Swahili Mombasa | 0.08640 | 0.00000 +-<br>0.0000 | 0.04976  | 0.00000 +-<br>0.0000 | 0.02873  | 0.01802 +-<br>0.0121 | 0.00000 | *                    |
| China Dai             | 0.18206 | 0.00000 +-<br>0.0000 | 0.19785  | 0.00000 +-<br>0.0000 | 0.22294  | 0.00000 +-<br>0.0000 | 0.25758 | 0.00000 +-<br>0.0000 |
| China Han Beijing     | 0.16500 | 0.00000 +-<br>0.0000 | 0.17022  | 0.00000 +-<br>0.0000 | 0.19531  | 0.00000 +-<br>0.0000 | 0.22658 | 0.00000 +-<br>0.0000 |
| China Han South       | 0.16673 | 0.00000 +-<br>0.0000 | 0.17191  | 0.00000 +-<br>0.0000 | 0.19645  | 0.00000 +-<br>0.0000 | 0.22807 | 0.00000 +-<br>0.0000 |
| Japan Japanese        | 0.20145 | 0.00000 +-<br>0.0000 | 0.20366  | 0.00000 +-<br>0.0000 | 0.22793  | 0.00000 +-<br>0.0000 | 0.26183 | 0.00000 +-<br>0.0000 |
| Vietnam Kinh          | 0.19734 | 0.00000 +-<br>0.0000 | 0.21764  | 0.00000 +-<br>0.0000 | 0.24274  | 0.00000 +-<br>0.0000 | 0.27943 | 0.00000 +-<br>0.0000 |
| USA European          | 0.25678 | 0.00000 +-<br>0.0000 | 0.26085  | 0.00000 +-<br>0.0000 | 0.28714  | 0.00000 +-<br>0.0000 | 0.32041 | 0.00000 +-<br>0.0000 |
| Bangladesh Bengali    | 0.30562 | 0.00000 +-<br>0.0000 | 0.34119  | 0.00000 +-<br>0.0000 | 0.36229  | 0.00000 +-<br>0.0000 | 0.42565 | 0.00000 +-<br>0.0000 |
| India Gujarati        | 0.23839 | 0.00000 +-<br>0.0000 | 0.24971  | 0.00000 +-<br>0.0000 | 0.27111  | 0.00000 +-<br>0.0000 | 0.31226 | 0.00000 +-<br>0.0000 |
| India Telugu          | 0.27827 | 0.00000 +-<br>0.0000 | 0.30380  | 0.00000 +-<br>0.0000 | 0.32489  | 0.00000 +-<br>0.0000 | 0.37631 | 0.00000 +-<br>0.0000 |
| India Punjab          | 0.26216 | 0.00000 +-<br>0.0000 | 0.28343  | 0.00000 +-<br>0.0000 | 0.30588  | 0.00000 +-<br>0.0000 | 0.35249 | 0.00000 +-<br>0.0000 |
| Sri Lanka Tamil       | 0.24803 | 0.00000 +-<br>0.0000 | 0.26228  | 0.00000 +-<br>0.0000 | 0.28465  | 0.00000 +-<br>0.0000 | 0.32629 | 0.00000 +-<br>0.0000 |
| Indonesia Ma'anyan    | 0.23512 | 0.00000 +-<br>0.0000 | 0.24875  | 0.00000 +-<br>0.0000 | 0.27672  | 0.00000 +-<br>0.0000 | 0.32811 | 0.00000 +-<br>0.0000 |
| Indonesia SK Dayak    | 0.18114 | 0.00000 +-<br>0.0000 | 0.19856  | 0.00000 +-<br>0.0000 | 0.22854  | 0.00000 +-<br>0.0000 | 0.27229 | 0.00000 +-<br>0.0000 |
| Indonesia Java        | 0.19635 | 0.00000 +-<br>0.0000 | 0.21896  | 0.00000 +-<br>0.0000 | 0.24905  | 0.00000 +-<br>0.0000 | 0.29619 | 0.00000 +-<br>0.0000 |
| Indonesia Bali        | 0.22255 | 0.00000 +-<br>0.0000 | 0.23589  | 0.00000 +-<br>0.0000 | 0.26412  | 0.00000 +-<br>0.0000 | 0.31417 | 0.00000 +-<br>0.0000 |
| Indonesia Bajo        | 0.21308 | 0.00000 +-<br>0.0000 | 0.22987  | 0.00000 +-<br>0.0000 | 0.25870  | 0.00000 +-<br>0.0000 | 0.30641 | 0.00000 +-<br>0.0000 |

Table S6. Pairwise  $F_{ST}$  values obtained for Comoros and Swahili groups and each population using haplogroup mtDNA data. Comorian data were published previously<sup>4</sup>.  $P$ : p-value and its standard deviation.

|                           | Comoros Comorian |                      | Kenya Swahili Kilifi |                      | Kenya Swahili Lamu |                      | Kenya Swahili Mombasa |                  |
|---------------------------|------------------|----------------------|----------------------|----------------------|--------------------|----------------------|-----------------------|------------------|
|                           | FST              | P                    | FST                  | P                    | FST                | P                    | FST                   | P                |
| Madagascar Antaisaka      | 0.22133          | 0.01802 +-<br>0.0121 | 0.16549              | 0.00901 +-<br>0.0091 | 0.15091            | 0.11712 +-<br>0.0273 | 0.03102               | 0.16216 +-0.0503 |
| Madagascar Antandroy      | -0.00639         | 0.50450 +-<br>0.0338 | 0.02152              | 0.09009 +-<br>0.0271 | -0.03220           | 0.45045 +-<br>0.0525 | 0.06505               | 0.00000 +-0.0000 |
| Madagascar Antanosy       | 0.05773          | 0.00901 +-<br>0.0091 | 0.04603              | 0.00901 +-<br>0.0091 | 0.00624            | 0.36036 +-<br>0.0332 | 0.01709               | 0.00000 +-0.0000 |
| Egypt Arab                | 0.36067          | 0.00000 +-<br>0.0000 | 0.30245              | 0.00000 +-<br>0.0000 | 0.29023            | 0.00000 +-<br>0.0000 | 0.18852               | 0.00000 +-0.0000 |
| Egypt Misc.               | 0.34917          | 0.00000 +-<br>0.0000 | 0.28957              | 0.00000 +-<br>0.0000 | 0.26889            | 0.00000 +-<br>0.0000 | 0.18947               | 0.00000 +-0.0000 |
| Ethiopia Amhara           | 0.38191          | 0.00000 +-<br>0.0000 | 0.30044              | 0.00000 +-<br>0.0000 | 0.31607            | 0.00000 +-<br>0.0000 | 0.19845               | 0.00000 +-0.0000 |
| Ethiopia Jew              | 0.35148          | 0.00000 +-<br>0.0000 | 0.26169              | 0.00000 +-<br>0.0000 | 0.33847            | 0.00000 +-<br>0.0000 | 0.24869               | 0.00000 +-0.0000 |
| Ethiopia Oromo            | 0.45885          | 0.00000 +-<br>0.0000 | 0.39560              | 0.00000 +-<br>0.0000 | 0.39814            | 0.00000 +-<br>0.0000 | 0.30035               | 0.00000 +-0.0000 |
| Ethiopia South Semitic    | 0.43549          | 0.00000 +-<br>0.0000 | 0.34789              | 0.00000 +-<br>0.0000 | 0.33907            | 0.00000 +-<br>0.0000 | 0.23906               | 0.00000 +-0.0000 |
| Kenya Bantu               | 0.09131          | 0.00000 +-<br>0.0000 | 0.05072              | 0.00000 +-<br>0.0000 | 0.05055            | 0.18018 +-<br>0.0407 | 0.05653               | 0.00000 +-0.0000 |
| Kenya Kikuyu Kamba        | 0.13237          | 0.00000 +-<br>0.0000 | 0.11928              | 0.00000 +-<br>0.0000 | -0.00898           | 0.40541 +-<br>0.0455 | 0.10652               | 0.00000 +-0.0000 |
| Kenya Luo                 | -0.03574         | 0.74775 +-<br>0.0385 | -0.05623             | 0.89189 +-<br>0.0165 | 0.02477            | 0.32432 +-<br>0.0411 | 0.07027               | 0.01802 +-0.0121 |
| Kenya Masai               | 0.34386          | 0.00000 +-<br>0.0000 | 0.24649              | 0.00000 +-<br>0.0000 | 0.28799            | 0.01802 +-<br>0.0121 | 0.22714               | 0.00000 +-0.0000 |
| Kenya Swahili Kilifi      | 0.00000          | *                    | 0.00952              | 0.18018 +-<br>0.0507 | -0.03299           | 0.57658 +-<br>0.0454 | 0.08712               | 0.00000 +-0.0000 |
| Kenya Swahili Lamu        | 0.00952          | 0.18018 +-<br>0.0507 | 0.00000              | *                    | 0.02466            | 0.25225 +-<br>0.0466 | 0.07524               | 0.00000 +-0.0000 |
| Kenya Swahili Mombasa     | -0.03299         | 0.57658 +-<br>0.0454 | 0.02466              | 0.25225 +-<br>0.0466 | 0.00000            | *                    | 0.04074               | 0.18018 +-0.0507 |
| Madagascar Merina         | 0.27619          | 0.00000 +-<br>0.0000 | 0.22339              | 0.00000 +-<br>0.0000 | 0.24013            | 0.13514 +-<br>0.0339 | 0.11562               | 0.02703 +-0.0194 |
| Mozambique Misc.          | 0.46463          | 0.00000 +-<br>0.0000 | 0.39984              | 0.00000 +-<br>0.0000 | 0.41213            | 0.01802 +-<br>0.0121 | 0.30322               | 0.00000 +-0.0000 |
| Oman Arab                 | 0.35410          | 0.00000 +-<br>0.0000 | 0.29724              | 0.00000 +-<br>0.0000 | 0.30234            | 0.00000 +-<br>0.0000 | 0.15291               | 0.00000 +-0.0000 |
| Rwanda Hutu               | 0.04280          | 0.00901 +-<br>0.0091 | 0.13471              | 0.00000 +-<br>0.0000 | -0.04383           | 0.61261 +-<br>0.0446 | 0.13310               | 0.00000 +-0.0000 |
| Rwanda Tutsi              | -0.00033         | 0.28829 +-<br>0.0445 | 0.05995              | 0.01802 +-<br>0.0121 | -0.01716           | 0.62162 +-<br>0.0252 | 0.11905               | 0.00000 +-0.0000 |
| Somalia Misc.Danish       | 0.62284          | 0.00000 +-<br>0.0000 | 0.59062              | 0.00000 +-<br>0.0000 | 0.59915            | 0.00000 +-<br>0.0000 | 0.42005               | 0.00000 +-0.0000 |
| South Africa !Kung        | 0.12598          | 0.00000 +-<br>0.0000 | 0.04914              | 0.04505 +-<br>0.0152 | 0.15879            | 0.03604 +-<br>0.0148 | 0.12848               | 0.00000 +-0.0000 |
| South Africa Khwe         | 0.08188          | 0.00000 +-<br>0.0000 | 0.07327              | 0.00000 +-<br>0.0000 | -0.02456           | 0.45946 +-<br>0.0394 | 0.08779               | 0.00000 +-0.0000 |
| South Africa Sotho-Tswana | -0.02140         | 0.97297 +-<br>0.0125 | -0.00652             | 0.44144 +-<br>0.0497 | -0.04546           | 0.74775 +-<br>0.0305 | 0.06496               | 0.00000 +-0.0000 |
| South Africa Xhosa        | 0.08866          | 0.00000 +-<br>0.0000 | 0.08041              | 0.00901 +-<br>0.0091 | 0.06092            | 0.12613 +-<br>0.0242 | 0.04852               | 0.00000 +-0.0000 |
| South Africa Zulu         | 0.03821          | 0.06306 +-<br>0.0237 | 0.01385              | 0.23423 +-<br>0.0338 | 0.03785            | 0.17117 +-<br>0.0417 | 0.03979               | 0.00000 +-0.0000 |
| Sudan Arakien             | 0.50857          | 0.00000 +-<br>0.0000 | 0.43355              | 0.00000 +-<br>0.0000 | 0.48571            | 0.00000 +-<br>0.0000 | 0.24207               | 0.00000 +-0.0000 |
| Sudan Beja                | 0.46732          | 0.00000 +-<br>0.0000 | 0.39763              | 0.00000 +-<br>0.0000 | 0.40065            | 0.00000 +-<br>0.0000 | 0.25567               | 0.00000 +-0.0000 |
| Sudan Borgu               | 0.43746          | 0.00000 +-<br>0.0000 | 0.33658              | 0.00000 +-<br>0.0000 | 0.39619            | 0.00000 +-<br>0.0000 | 0.28662               | 0.00000 +-0.0000 |
| Sudan Copte               | 0.40387          | 0.00000 +-<br>0.0000 | 0.31621              | 0.00000 +-<br>0.0000 | 0.34840            | 0.00000 +-<br>0.0000 | 0.19083               | 0.00000 +-0.0000 |
| Sudan Dinka               | 0.54042          | 0.00000 +-<br>0.0000 | 0.41771              | 0.00000 +-<br>0.0000 | 0.69076            | 0.00000 +-<br>0.0000 | 0.38289               | 0.00000 +-0.0000 |
| Sudan Fulani              | 0.47947          | 0.00000 +-<br>0.0000 | 0.40452              | 0.00000 +-<br>0.0000 | 0.41974            | 0.00000 +-<br>0.0000 | 0.27325               | 0.00000 +-0.0000 |

|                    |         |                      |         |                      |          |                      |         |                  |
|--------------------|---------|----------------------|---------|----------------------|----------|----------------------|---------|------------------|
| Sudan Fur          | 0.46152 | 0.00000 +-<br>0.0000 | 0.36795 | 0.00000 +-<br>0.0000 | 0.43053  | 0.00000 +-<br>0.0000 | 0.30100 | 0.00000 +-0.0000 |
| Sudan Gaalien      | 0.37250 | 0.00000 +-<br>0.0000 | 0.29725 | 0.00000 +-<br>0.0000 | 0.30816  | 0.00000 +-<br>0.0000 | 0.17020 | 0.00000 +-0.0000 |
| Sudan Hausa        | 0.31504 | 0.00000 +-<br>0.0000 | 0.21682 | 0.00000 +-<br>0.0000 | 0.29703  | 0.00000 +-<br>0.0000 | 0.19687 | 0.00000 +-0.0000 |
| Sudan Masalit      | 0.51606 | 0.00000 +-<br>0.0000 | 0.43749 | 0.00000 +-<br>0.0000 | 0.49377  | 0.00000 +-<br>0.0000 | 0.33334 | 0.00000 +-0.0000 |
| Sudan Meseria      | 0.41778 | 0.00000 +-<br>0.0000 | 0.33750 | 0.00000 +-<br>0.0000 | 0.34647  | 0.00000 +-<br>0.0000 | 0.18777 | 0.00000 +-0.0000 |
| Sudan Nuba         | 0.45964 | 0.00000 +-<br>0.0000 | 0.34225 | 0.00000 +-<br>0.0000 | 0.49133  | 0.00000 +-<br>0.0000 | 0.31958 | 0.00000 +-0.0000 |
| Sudan Nubian       | 0.39674 | 0.00000 +-<br>0.0000 | 0.31737 | 0.00000 +-<br>0.0000 | 0.32903  | 0.00000 +-<br>0.0000 | 0.18439 | 0.00000 +-0.0000 |
| Sudan Nuer         | 0.51236 | 0.00000 +-<br>0.0000 | 0.37588 | 0.00000 +-<br>0.0000 | 0.65383  | 0.00000 +-<br>0.0000 | 0.36358 | 0.00000 +-0.0000 |
| Sudan Shilluk      | 0.50406 | 0.00000 +-<br>0.0000 | 0.37055 | 0.00000 +-<br>0.0000 | 0.62500  | 0.00000 +-<br>0.0000 | 0.35640 | 0.00000 +-0.0000 |
| Tanzania Burunge   | 0.37516 | 0.00000 +-<br>0.0000 | 0.24614 | 0.00000 +-<br>0.0000 | 0.36418  | 0.00000 +-<br>0.0000 | 0.25015 | 0.00000 +-0.0000 |
| Tanzania Datog     | 0.38448 | 0.00000 +-<br>0.0000 | 0.30390 | 0.00000 +-<br>0.0000 | 0.27472  | 0.00901 +-<br>0.0091 | 0.22676 | 0.00000 +-0.0000 |
| Tanzania Datoga    | 0.48584 | 0.00000 +-<br>0.0000 | 0.43183 | 0.00000 +-<br>0.0000 | 0.42421  | 0.00000 +-<br>0.0000 | 0.31845 | 0.00000 +-0.0000 |
| Tanzania Hadza     | 0.30662 | 0.00000 +-<br>0.0000 | 0.18914 | 0.00000 +-<br>0.0000 | 0.36678  | 0.00000 +-<br>0.0000 | 0.24174 | 0.00000 +-0.0000 |
| Tanzania Hadzabe   | 0.39165 | 0.00000 +-<br>0.0000 | 0.29201 | 0.00000 +-<br>0.0000 | 0.42020  | 0.00000 +-<br>0.0000 | 0.28230 | 0.00000 +-0.0000 |
| Tanzania Iraqw     | 0.36505 | 0.00000 +-<br>0.0000 | 0.28104 | 0.00000 +-<br>0.0000 | 0.31874  | 0.00000 +-<br>0.0000 | 0.23815 | 0.00000 +-0.0000 |
| Tanzania Mbugwe    | 0.20190 | 0.00000 +-<br>0.0000 | 0.11269 | 0.00901 +-<br>0.0091 | 0.10026  | 0.19820 +-<br>0.0445 | 0.09437 | 0.00901 +-0.0091 |
| Tanzania Sandawe   | 0.11981 | 0.00000 +-<br>0.0000 | 0.06333 | 0.00000 +-<br>0.0000 | 0.06718  | 0.23423 +-<br>0.0511 | 0.10737 | 0.00000 +-0.0000 |
| Tanzania Sukuma    | 0.31457 | 0.00000 +-<br>0.0000 | 0.24579 | 0.00000 +-<br>0.0000 | 0.29826  | 0.00000 +-<br>0.0000 | 0.20164 | 0.00000 +-0.0000 |
| Tanzania Turu      | 0.08225 | 0.00901 +-<br>0.0091 | 0.04188 | 0.11712 +-<br>0.0237 | 0.02985  | 0.39640 +-<br>0.0653 | 0.06510 | 0.00000 +-0.0000 |
| Tanzania Wairak    | 0.13931 | 0.00000 +-<br>0.0000 | 0.10730 | 0.00000 +-<br>0.0000 | 0.04145  | 0.29730 +-<br>0.0508 | 0.11190 | 0.00000 +-0.0000 |
| Uganda Ganda       | 0.00615 | 0.27027 +-<br>0.0359 | 0.05438 | 0.02703 +-<br>0.0194 | -0.04457 | 0.69369 +-<br>0.0385 | 0.08516 | 0.00000 +-0.0000 |
| Zimbabwe Shona     | 0.03028 | 0.06306 +-<br>0.0139 | 0.11362 | 0.00000 +-<br>0.0000 | 0.00952  | 0.19820 +-<br>0.0297 | 0.14341 | 0.00000 +-0.0000 |
| Comoros Comorian   | 0.08712 | 0.00000 +-<br>0.0000 | 0.07524 | 0.00000 +-<br>0.0000 | 0.04074  | 0.18018 +-<br>0.0507 | 0.00000 | *                |
| China Dai          | 0.49799 | 0.00000 +-<br>0.0000 | 0.43285 | 0.00000 +-<br>0.0000 | 0.48923  | 0.00000 +-<br>0.0000 | 0.28925 | 0.00000 +-0.0000 |
| China Han Beijing  | 0.45183 | 0.00000 +-<br>0.0000 | 0.38538 | 0.00000 +-<br>0.0000 | 0.42319  | 0.00000 +-<br>0.0000 | 0.27045 | 0.00000 +-0.0000 |
| China Han South    | 0.60733 | 0.00000 +-<br>0.0000 | 0.55936 | 0.00000 +-<br>0.0000 | 0.67531  | 0.00000 +-<br>0.0000 | 0.38534 | 0.00000 +-0.0000 |
| Japan Japanese     | 0.45257 | 0.00000 +-<br>0.0000 | 0.38223 | 0.00000 +-<br>0.0000 | 0.42575  | 0.00000 +-<br>0.0000 | 0.26225 | 0.00000 +-0.0000 |
| Vietnam Kinh       | 0.45933 | 0.00000 +-<br>0.0000 | 0.39451 | 0.00000 +-<br>0.0000 | 0.43410  | 0.00000 +-<br>0.0000 | 0.26924 | 0.00000 +-0.0000 |
| USA European       | 0.48312 | 0.00000 +-<br>0.0000 | 0.41541 | 0.00000 +-<br>0.0000 | 0.47299  | 0.00000 +-<br>0.0000 | 0.29936 | 0.00000 +-0.0000 |
| Bangladesh Bengali | 0.37850 | 0.00000 +-<br>0.0000 | 0.30633 | 0.00000 +-<br>0.0000 | 0.32001  | 0.00000 +-<br>0.0000 | 0.19014 | 0.00000 +-0.0000 |
| India Gujarati     | 0.35382 | 0.00000 +-<br>0.0000 | 0.28611 | 0.00000 +-<br>0.0000 | 0.30344  | 0.00000 +-<br>0.0000 | 0.18798 | 0.00000 +-0.0000 |
| India Telugu       | 0.36831 | 0.00000 +-<br>0.0000 | 0.30297 | 0.00000 +-<br>0.0000 | 0.31964  | 0.00000 +-<br>0.0000 | 0.20173 | 0.00000 +-0.0000 |
| India Punjab       | 0.39609 | 0.00000 +-<br>0.0000 | 0.32845 | 0.00000 +-<br>0.0000 | 0.34838  | 0.00000 +-<br>0.0000 | 0.18738 | 0.00000 +-0.0000 |
| Sri Lanka Tamil    | 0.37230 | 0.00000 +-<br>0.0000 | 0.30561 | 0.00000 +-<br>0.0000 | 0.32179  | 0.00000 +-<br>0.0000 | 0.19263 | 0.00000 +-0.0000 |
| Indonesia Ma'anyan | 0.44010 | 0.00000 +-<br>0.0000 | 0.35350 | 0.00000 +-<br>0.0000 | 0.38726  | 0.00000 +-<br>0.0000 | 0.24043 | 0.00000 +-0.0000 |

|                    |         |                      |         |                      |         |                      |         |                  |
|--------------------|---------|----------------------|---------|----------------------|---------|----------------------|---------|------------------|
|                    |         | 0.0000               |         | 0.0000               |         | 0.0000               |         |                  |
| Indonesia SK Dayak | 0.41224 | 0.00000 +-<br>0.0000 | 0.32750 | 0.00000 +-<br>0.0000 | 0.34642 | 0.00000 +-<br>0.0000 | 0.22078 | 0.00000 +-0.0000 |
| Indonesia Java     | 0.43097 | 0.00000 +-<br>0.0000 | 0.35376 | 0.00000 +-<br>0.0000 | 0.37793 | 0.00000 +-<br>0.0000 | 0.23117 | 0.00000 +-0.0000 |
| Indonesia Bali     | 0.48353 | 0.00000 +-<br>0.0000 | 0.41079 | 0.00000 +-<br>0.0000 | 0.46152 | 0.00000 +-<br>0.0000 | 0.28300 | 0.00000 +-0.0000 |
| Indonesia Bajo     | 0.37479 | 0.00000 +-<br>0.0000 | 0.28730 | 0.00000 +-<br>0.0000 | 0.29482 | 0.00000 +-<br>0.0000 | 0.17628 | 0.00000 +-0.0000 |

Table S7. Pairwise  $F_{ST}$  values obtained for Comoros and Swahili groups and each population using haplogroup NRY data. Comorian data were published previously<sup>4</sup>.  $P$ : p-value and its standard deviation.

|                           | Comoros Comoros Anjouan |         | Comoros Comoros Grande Comore |         | Comoros Comoros Moheli |         | Kenya Swahili Kilifi |         | Kenya Swahili Lamu |         | Kenya Swahili Mombasa |         |
|---------------------------|-------------------------|---------|-------------------------------|---------|------------------------|---------|----------------------|---------|--------------------|---------|-----------------------|---------|
|                           | F <sub>ST</sub>         | S.D     | F <sub>ST</sub>               | S.D     | F <sub>ST</sub>        | S.D     | F <sub>ST</sub>      | S.D     | F <sub>ST</sub>    | S.D     | F <sub>ST</sub>       | S.D     |
| Algeria Mozabite          | 0.056                   | 6.0E-04 | 0.058                         | 6.2E-04 | 0.055                  | 6.3E-04 | 0.073                | 6.4E-04 | 0.074              | 6.3E-04 | 0.067                 | 6.2E-04 |
| Armenia Armenian          | 0.08                    | 7.1E-04 | 0.081                         | 7.1E-04 | 0.078                  | 7.6E-04 | 0.103                | 7.1E-04 | 0.105              | 7.4E-04 | 0.098                 | 6.9E-04 |
| Bangladesh Bengali        | 0.072                   | 6.5E-04 | 0.073                         | 6.6E-04 | 0.07                   | 6.8E-04 | 0.097                | 6.4E-04 | 0.099              | 6.5E-04 | 0.093                 | 6.5E-04 |
| Botswana GuiGhanaKgal     | 0.052                   | 6.7E-04 | 0.054                         | 6.7E-04 | 0.051                  | 6.9E-04 | 0.046                | 6.2E-04 | 0.047              | 6.4E-04 | 0.047                 | 6.2E-04 |
| Brunei Dusun              | 0.117                   | 9.3E-04 | 0.117                         | 9.6E-04 | 0.114                  | 9.7E-04 | 0.146                | 9.8E-04 | 0.148              | 9.9E-04 | 0.143                 | 9.6E-04 |
| Brunei Murut              | 0.121                   | 9.1E-04 | 0.12                          | 9.6E-04 | 0.118                  | 9.6E-04 | 0.15                 | 9.6E-04 | 0.151              | 9.7E-04 | 0.146                 | 9.4E-04 |
| Bulgaria Bulgarian        | 0.111                   | 7.2E-04 | 0.112                         | 7.2E-04 | 0.109                  | 7.4E-04 | 0.127                | 7.2E-04 | 0.128              | 7.4E-04 | 0.126                 | 7.2E-04 |
| Burkina Faso Gurmantche   | 0.014                   | 3.5E-04 | 0.016                         | 3.6E-04 | 0.014                  | 3.5E-04 | 0.008                | 2.5E-04 | 0.008              | 2.4E-04 | 0.009                 | 2.6E-04 |
| Burkina Faso Gurunsi      | 0.015                   | 3.4E-04 | 0.017                         | 3.6E-04 | 0.014                  | 3.4E-04 | 0.009                | 2.5E-04 | 0.009              | 2.5E-04 | 0.009                 | 2.7E-04 |
| Burkina Faso Mossi        | 0.015                   | 3.5E-04 | 0.016                         | 3.5E-04 | 0.014                  | 3.6E-04 | 0.009                | 2.4E-04 | 0.009              | 2.4E-04 | 0.009                 | 2.5E-04 |
| Burma Burmese             | 0.09                    | 8.0E-04 | 0.09                          | 7.9E-04 | 0.087                  | 8.2E-04 | 0.117                | 8.1E-04 | 0.118              | 8.1E-04 | 0.113                 | 8.1E-04 |
| Cambodia Cambodian        | 0.099                   | 9.0E-04 | 0.099                         | 9.4E-04 | 0.096                  | 9.3E-04 | 0.127                | 9.3E-04 | 0.129              | 9.5E-04 | 0.124                 | 9.4E-04 |
| Cameroon Baka             | 0.038                   | 5.2E-04 | 0.039                         | 5.1E-04 | 0.037                  | 5.2E-04 | 0.031                | 4.3E-04 | 0.032              | 4.4E-04 | 0.031                 | 4.5E-04 |
| Cameroon Nzime            | 0.012                   | 3.0E-04 | 0.014                         | 3.1E-04 | 0.012                  | 3.1E-04 | 0.005                | 1.8E-04 | 0.006              | 1.8E-04 | 0.006                 | 2.0E-04 |
| CAR Biaka Pygmy           | 0.043                   | 5.8E-04 | 0.044                         | 5.5E-04 | 0.042                  | 5.4E-04 | 0.036                | 5.1E-04 | 0.037              | 5.1E-04 | 0.037                 | 5.3E-04 |
| Chad Daza                 | 0.025                   | 3.9E-04 | 0.027                         | 3.7E-04 | 0.024                  | 4.1E-04 | 0.027                | 3.6E-04 | 0.027              | 3.6E-04 | 0.023                 | 3.5E-04 |
| Chad Fulani               | 0.023                   | 4.5E-04 | 0.025                         | 4.4E-04 | 0.022                  | 4.5E-04 | 0.025                | 4.3E-04 | 0.026              | 4.3E-04 | 0.023                 | 4.4E-04 |
| Chad Kanembu              | 0.014                   | 6.3E-04 | 0.016                         | 6.3E-04 | 0.013                  | 6.5E-04 | 0.012                | 6.0E-04 | 0.012              | 6.1E-04 | 0.01                  | 6.1E-04 |
| China Dai                 | 0.111                   | 8.9E-04 | 0.111                         | 9.3E-04 | 0.108                  | 9.1E-04 | 0.14                 | 9.3E-04 | 0.141              | 9.5E-04 | 0.136                 | 9.1E-04 |
| China Han                 | 0.11                    | 9.0E-04 | 0.11                          | 9.0E-04 | 0.107                  | 9.4E-04 | 0.138                | 9.2E-04 | 0.14               | 9.4E-04 | 0.135                 | 9.0E-04 |
| Comoros Comoros Anjouan   | -                       | -       | 0.007                         | 2.9E-04 | 0.004                  | 2.7E-04 | 0.008                | 2.6E-04 | 0.009              | 2.7E-04 | 0.008                 | 2.8E-04 |
| Comoros Comoros GdeComore | 0.007                   | 2.9E-04 | -                             | -       | 0.004                  | 2.7E-04 | 0.01                 | 2.9E-04 | 0.01               | 2.8E-04 | 0.01                  | 2.9E-04 |
| Comoros Comoros Moheli    | 0.004                   | 2.7E-04 | 0.004                         | 2.7E-04 | -                      | -       | 0.007                | 2.7E-04 | 0.008              | 2.8E-04 | 0.007                 | 2.8E-04 |
| Croatia Croatian          | 0.086                   | 7.5E-04 | 0.087                         | 7.3E-04 | 0.084                  | 7.8E-04 | 0.11                 | 7.6E-04 | 0.112              | 7.6E-04 | 0.105                 | 7.5E-04 |
| Cyprus Cypriot            | 0.081                   | 7.7E-04 | 0.082                         | 7.5E-04 | 0.079                  | 8.0E-04 | 0.104                | 7.7E-04 | 0.106              | 7.8E-04 | 0.098                 | 7.6E-04 |
| DR Congo Mbuti Pygmy      | 0.078                   | 8.5E-04 | 0.079                         | 8.5E-04 | 0.077                  | 8.6E-04 | 0.071                | 7.9E-04 | 0.072              | 7.9E-04 | 0.071                 | 8.0E-04 |
| Dubai Arab                | 0.04                    | 4.9E-04 | 0.041                         | 5.2E-04 | 0.039                  | 5.5E-04 | 0.057                | 5.2E-04 | 0.059              | 5.3E-04 | 0.053                 | 5.1E-04 |
| Egypt Egyptian            | 0.054                   | 6.6E-04 | 0.056                         | 6.5E-04 | 0.053                  | 7.1E-04 | 0.073                | 7.0E-04 | 0.074              | 6.9E-04 | 0.067                 | 6.7E-04 |
| Ethiopia Afar             | 0.037                   | 5.3E-04 | 0.038                         | 5.3E-04 | 0.035                  | 5.6E-04 | 0.047                | 5.6E-04 | 0.047              | 5.7E-04 | 0.041                 | 5.4E-04 |
| Ethiopia Amhara           | 0.033                   | 4.3E-04 | 0.035                         | 4.5E-04 | 0.032                  | 4.6E-04 | 0.044                | 4.5E-04 | 0.045              | 4.7E-04 | 0.038                 | 4.4E-04 |
| Ethiopia Anuak            | 0.026                   | 3.7E-04 | 0.028                         | 3.9E-04 | 0.025                  | 3.7E-04 | 0.021                | 3.1E-04 | 0.021              | 3.1E-04 | 0.018                 | 2.8E-04 |
| Ethiopia Ari Blacksmith   | 0.055                   | 6.8E-04 | 0.056                         | 6.9E-04 | 0.054                  | 6.8E-04 | 0.057                | 6.4E-04 | 0.058              | 6.5E-04 | 0.053                 | 6.4E-04 |
| Ethiopia Ari Cultivator   | 0.034                   | 4.0E-04 | 0.035                         | 4.0E-04 | 0.033                  | 4.0E-04 | 0.037                | 3.8E-04 | 0.037              | 3.7E-04 | 0.032                 | 3.6E-04 |
| Ethiopia Ethiopian Jews   | 0.032                   | 5.0E-04 | 0.033                         | 5.0E-04 | 0.031                  | 5.2E-04 | 0.042                | 5.1E-04 | 0.042              | 5.2E-04 | 0.036                 | 4.9E-04 |
| Ethiopia Ethiopians       | 0.035                   | 6.8E-04 | 0.036                         | 7.0E-04 | 0.033                  | 6.9E-04 | 0.045                | 7.1E-04 | 0.046              | 7.2E-04 | 0.04                  | 7.0E-04 |
| Ethiopia Gumuz            | 0.037                   | 4.6E-04 | 0.038                         | 4.6E-04 | 0.036                  | 4.6E-04 | 0.035                | 4.0E-04 | 0.035              | 4.2E-04 | 0.031                 | 3.9E-04 |
| Ethiopia Oromo            | 0.027                   | 3.6E-04 | 0.028                         | 3.8E-04 | 0.026                  | 4.0E-04 | 0.034                | 3.6E-04 | 0.035              | 3.9E-04 | 0.029                 | 3.6E-04 |
| Ethiopia Somali           | 0.031                   | 4.6E-04 | 0.032                         | 4.5E-04 | 0.03                   | 4.6E-04 | 0.038                | 4.6E-04 | 0.039              | 4.7E-04 | 0.032                 | 4.2E-04 |
| Ethiopia Tygray           | 0.034                   | 4.4E-04 | 0.036                         | 4.4E-04 | 0.032                  | 4.7E-04 | 0.045                | 4.5E-04 | 0.046              | 4.7E-04 | 0.039                 | 4.4E-04 |
| Ethiopia Wolayta          | 0.027                   | 5.2E-04 | 0.028                         | 5.0E-04 | 0.025                  | 5.2E-04 | 0.033                | 5.2E-04 | 0.034              | 5.1E-04 | 0.028                 | 5.0E-04 |

|                                   |       |         |       |         |       |         |       |         |       |         |       |         |
|-----------------------------------|-------|---------|-------|---------|-------|---------|-------|---------|-------|---------|-------|---------|
| France French                     | 0.087 | 7.6E-04 | 0.088 | 7.4E-04 | 0.085 | 7.8E-04 | 0.11  | 7.5E-04 | 0.112 | 7.6E-04 | 0.105 | 7.5E-04 |
| Gabon Baka                        | 0.038 | 5.5E-04 | 0.04  | 5.4E-04 | 0.038 | 5.4E-04 | 0.031 | 4.6E-04 | 0.032 | 4.8E-04 | 0.032 | 4.7E-04 |
| Gabon Bongo                       | 0.024 | 3.9E-04 | 0.026 | 3.9E-04 | 0.024 | 4.1E-04 | 0.017 | 2.9E-04 | 0.017 | 2.9E-04 | 0.018 | 3.1E-04 |
| Gabon Nzebi                       | 0.012 | 3.0E-04 | 0.014 | 3.2E-04 | 0.011 | 3.2E-04 | 0.005 | 2.0E-04 | 0.005 | 2.0E-04 | 0.006 | 2.2E-04 |
| Gambia Gambian                    | 0.016 | 3.3E-04 | 0.018 | 3.2E-04 | 0.016 | 3.3E-04 | 0.011 | 2.2E-04 | 0.011 | 2.2E-04 | 0.011 | 2.4E-04 |
| Georgia Abkhasian                 | 0.083 | 7.4E-04 | 0.084 | 7.5E-04 | 0.081 | 7.9E-04 | 0.106 | 7.3E-04 | 0.108 | 7.5E-04 | 0.101 | 7.2E-04 |
| Georgia Abkhasian                 | 0.082 | 1.2E-03 | 0.083 | 1.2E-03 | 0.08  | 1.3E-03 | 0.105 | 1.2E-03 | 0.107 | 1.2E-03 | 0.1   | 1.2E-03 |
| Georgia Balkar                    | 0.079 | 7.8E-04 | 0.08  | 7.5E-04 | 0.077 | 8.0E-04 | 0.102 | 7.5E-04 | 0.105 | 7.9E-04 | 0.098 | 7.6E-04 |
| Georgia Chechen                   | 0.084 | 8.1E-04 | 0.085 | 8.2E-04 | 0.081 | 8.5E-04 | 0.107 | 8.2E-04 | 0.109 | 8.2E-04 | 0.102 | 8.1E-04 |
| Georgia Georgian                  | 0.084 | 7.5E-04 | 0.084 | 7.4E-04 | 0.081 | 7.9E-04 | 0.107 | 7.2E-04 | 0.109 | 7.5E-04 | 0.101 | 7.2E-04 |
| Georgia Georgians                 | 0.084 | 7.8E-04 | 0.084 | 8.0E-04 | 0.081 | 8.4E-04 | 0.107 | 7.7E-04 | 0.109 | 7.9E-04 | 0.102 | 7.7E-04 |
| Greece Greek                      | 0.091 | 6.4E-04 | 0.092 | 6.3E-04 | 0.089 | 6.7E-04 | 0.109 | 6.5E-04 | 0.11  | 6.7E-04 | 0.106 | 6.4E-04 |
| Hungary Hungarian                 | 0.086 | 7.6E-04 | 0.087 | 7.4E-04 | 0.084 | 8.1E-04 | 0.109 | 7.8E-04 | 0.111 | 8.0E-04 | 0.105 | 7.8E-04 |
| India Birhor                      | 0.098 | 8.9E-04 | 0.099 | 9.0E-04 | 0.096 | 9.2E-04 | 0.123 | 9.2E-04 | 0.125 | 9.1E-04 | 0.119 | 9.0E-04 |
| India Brahmin                     | 0.072 | 6.6E-04 | 0.073 | 6.6E-04 | 0.07  | 6.7E-04 | 0.096 | 6.5E-04 | 0.098 | 6.5E-04 | 0.091 | 6.5E-04 |
| India Brahmins from Uttar Pradesh | 0.073 | 7.9E-04 | 0.074 | 7.9E-04 | 0.071 | 8.4E-04 | 0.097 | 8.2E-04 | 0.099 | 8.2E-04 | 0.093 | 8.2E-04 |
| India Chamar                      | 0.078 | 7.4E-04 | 0.079 | 7.6E-04 | 0.076 | 7.9E-04 | 0.102 | 7.7E-04 | 0.104 | 7.6E-04 | 0.098 | 7.7E-04 |
| India Dharkar                     | 0.078 | 7.7E-04 | 0.078 | 8.0E-04 | 0.076 | 7.9E-04 | 0.102 | 7.9E-04 | 0.103 | 7.9E-04 | 0.098 | 8.0E-04 |
| India Dusadh                      | 0.075 | 8.6E-04 | 0.076 | 8.7E-04 | 0.073 | 9.0E-04 | 0.099 | 8.7E-04 | 0.101 | 8.8E-04 | 0.095 | 8.6E-04 |
| India Gond                        | 0.079 | 7.1E-04 | 0.08  | 7.1E-04 | 0.077 | 7.3E-04 | 0.103 | 7.1E-04 | 0.105 | 7.1E-04 | 0.1   | 7.2E-04 |
| India Gujarat Brahmin             | 0.072 | 6.4E-04 | 0.073 | 6.6E-04 | 0.07  | 6.9E-04 | 0.096 | 6.6E-04 | 0.098 | 6.7E-04 | 0.092 | 6.4E-04 |
| India Gujarati                    | 0.071 | 6.3E-04 | 0.073 | 6.3E-04 | 0.07  | 6.9E-04 | 0.096 | 6.3E-04 | 0.097 | 6.5E-04 | 0.092 | 6.3E-04 |
| India Ho                          | 0.085 | 7.4E-04 | 0.086 | 7.6E-04 | 0.083 | 7.6E-04 | 0.111 | 7.6E-04 | 0.112 | 7.7E-04 | 0.107 | 7.6E-04 |
| India Indian                      | 0.074 | 6.6E-04 | 0.076 | 6.5E-04 | 0.073 | 6.8E-04 | 0.099 | 6.4E-04 | 0.1   | 6.5E-04 | 0.095 | 6.6E-04 |
| India Irula                       | 0.099 | 8.4E-04 | 0.1   | 8.6E-04 | 0.097 | 8.7E-04 | 0.123 | 8.8E-04 | 0.125 | 9.0E-04 | 0.119 | 8.7E-04 |
| India Iyer                        | 0.073 | 6.4E-04 | 0.073 | 6.7E-04 | 0.071 | 6.9E-04 | 0.097 | 6.5E-04 | 0.098 | 6.6E-04 | 0.092 | 6.5E-04 |
| India Jamatia                     | 0.098 | 8.5E-04 | 0.097 | 8.6E-04 | 0.095 | 9.0E-04 | 0.125 | 8.6E-04 | 0.126 | 8.8E-04 | 0.121 | 8.8E-04 |
| India Jarawa                      | 0.164 | 1.4E-03 | 0.165 | 1.4E-03 | 0.163 | 1.4E-03 | 0.187 | 1.4E-03 | 0.189 | 1.4E-03 | 0.184 | 1.4E-03 |
| India Kadar                       | 0.091 | 7.7E-04 | 0.092 | 8.1E-04 | 0.09  | 8.1E-04 | 0.115 | 8.0E-04 | 0.117 | 8.1E-04 | 0.112 | 8.1E-04 |
| India Kanjars                     | 0.079 | 8.1E-04 | 0.08  | 8.5E-04 | 0.077 | 8.7E-04 | 0.103 | 8.4E-04 | 0.104 | 8.3E-04 | 0.099 | 8.5E-04 |
| India Khatri                      | 0.073 | 6.7E-04 | 0.074 | 6.9E-04 | 0.071 | 7.2E-04 | 0.096 | 6.9E-04 | 0.099 | 6.9E-04 | 0.092 | 6.7E-04 |
| India Kol                         | 0.076 | 7.1E-04 | 0.077 | 7.2E-04 | 0.074 | 7.6E-04 | 0.1   | 7.1E-04 | 0.102 | 7.3E-04 | 0.096 | 7.2E-04 |
| India Korva                       | 0.097 | 8.5E-04 | 0.098 | 8.6E-04 | 0.095 | 8.5E-04 | 0.122 | 8.3E-04 | 0.124 | 8.5E-04 | 0.119 | 8.5E-04 |
| India Kshatriya                   | 0.073 | 7.9E-04 | 0.074 | 7.8E-04 | 0.071 | 8.0E-04 | 0.096 | 7.9E-04 | 0.098 | 8.0E-04 | 0.092 | 8.1E-04 |
| India Manipuri Brahmin            | 0.081 | 7.4E-04 | 0.081 | 7.5E-04 | 0.078 | 7.6E-04 | 0.107 | 7.4E-04 | 0.109 | 7.6E-04 | 0.103 | 7.6E-04 |
| India Maratha                     | 0.075 | 8.1E-04 | 0.076 | 8.2E-04 | 0.073 | 8.6E-04 | 0.099 | 8.4E-04 | 0.101 | 8.4E-04 | 0.095 | 8.5E-04 |
| India Muslim                      | 0.074 | 8.8E-04 | 0.075 | 8.9E-04 | 0.072 | 9.1E-04 | 0.098 | 9.2E-04 | 0.1   | 9.2E-04 | 0.095 | 9.2E-04 |
| India North Kannadi               | 0.083 | 8.3E-04 | 0.084 | 8.3E-04 | 0.081 | 8.5E-04 | 0.107 | 8.1E-04 | 0.11  | 8.4E-04 | 0.103 | 8.3E-04 |
| India Onge                        | 0.171 | 1.5E-03 | 0.172 | 1.5E-03 | 0.169 | 1.5E-03 | 0.194 | 1.5E-03 | 0.195 | 1.5E-03 | 0.191 | 1.5E-03 |
| India Palian                      | 0.076 | 6.9E-04 | 0.077 | 6.7E-04 | 0.074 | 7.0E-04 | 0.1   | 6.6E-04 | 0.102 | 6.8E-04 | 0.097 | 6.7E-04 |
| India Paniya                      | 0.108 | 9.6E-04 | 0.108 | 9.3E-04 | 0.106 | 9.4E-04 | 0.131 | 9.4E-04 | 0.133 | 9.5E-04 | 0.128 | 9.4E-04 |
| India Piramalai Kallar            | 0.082 | 8.5E-04 | 0.082 | 8.4E-04 | 0.079 | 8.5E-04 | 0.105 | 8.4E-04 | 0.107 | 8.5E-04 | 0.102 | 8.5E-04 |
| India Pulliyar                    | 0.12  | 1.5E-03 | 0.121 | 1.5E-03 | 0.118 | 1.5E-03 | 0.143 | 1.5E-03 | 0.145 | 1.5E-03 | 0.14  | 1.5E-03 |
| India Punjabi                     | 0.072 | 6.5E-04 | 0.073 | 6.6E-04 | 0.07  | 6.9E-04 | 0.096 | 6.4E-04 | 0.098 | 6.5E-04 | 0.092 | 6.4E-04 |

|                                     |       |         |       |         |       |         |       |         |       |         |       |         |
|-------------------------------------|-------|---------|-------|---------|-------|---------|-------|---------|-------|---------|-------|---------|
| India Santal                        | 0.088 | 7.7E-04 | 0.088 | 7.7E-04 | 0.086 | 7.9E-04 | 0.113 | 7.7E-04 | 0.114 | 7.7E-04 | 0.109 | 7.8E-04 |
| India Tharu                         | 0.086 | 7.6E-04 | 0.087 | 7.8E-04 | 0.084 | 7.8E-04 | 0.112 | 7.7E-04 | 0.113 | 7.9E-04 | 0.108 | 7.9E-04 |
| India Tripuri                       | 0.093 | 8.4E-04 | 0.093 | 8.4E-04 | 0.09  | 8.7E-04 | 0.12  | 8.6E-04 | 0.122 | 8.8E-04 | 0.117 | 8.6E-04 |
| India Uttar Pradesh Scheduled Caste | 0.076 | 9.2E-04 | 0.077 | 9.6E-04 | 0.074 | 9.4E-04 | 0.1   | 9.7E-04 | 0.102 | 9.7E-04 | 0.096 | 9.6E-04 |
| India Velama                        | 0.079 | 7.7E-04 | 0.08  | 7.8E-04 | 0.077 | 8.1E-04 | 0.103 | 8.1E-04 | 0.105 | 8.1E-04 | 0.099 | 7.8E-04 |
| India West Bengal Brahmin           | 0.071 | 6.6E-04 | 0.072 | 6.7E-04 | 0.069 | 7.0E-04 | 0.096 | 6.7E-04 | 0.097 | 6.9E-04 | 0.091 | 6.7E-04 |
| Indonesia Bajo                      | 0.103 | 8.3E-04 | 0.103 | 8.7E-04 | 0.1   | 8.7E-04 | 0.131 | 8.6E-04 | 0.132 | 8.7E-04 | 0.127 | 8.6E-04 |
| Indonesia Bajo Derawan              | 0.107 | 9.0E-04 | 0.106 | 9.1E-04 | 0.104 | 9.3E-04 | 0.135 | 9.1E-04 | 0.136 | 9.2E-04 | 0.131 | 9.1E-04 |
| Indonesia Bajo Kotabaru             | 0.116 | 9.3E-04 | 0.116 | 9.4E-04 | 0.114 | 9.6E-04 | 0.144 | 9.6E-04 | 0.146 | 9.8E-04 | 0.141 | 9.5E-04 |
| Madagascar Antemoro                 | 0.011 | 3.1E-04 | 0.013 | 3.3E-04 | 0.01  | 2.9E-04 | 0.02  | 3.6E-04 | 0.021 | 3.7E-04 | 0.019 | 3.5E-04 |
| Madagascar Mikea                    | 0.015 | 3.7E-04 | 0.016 | 3.7E-04 | 0.013 | 3.7E-04 | 0.024 | 4.5E-04 | 0.024 | 4.6E-04 | 0.023 | 4.5E-04 |
| Madagascar Vezo                     | 0.014 | 3.5E-04 | 0.014 | 3.5E-04 | 0.011 | 3.2E-04 | 0.022 | 3.9E-04 | 0.024 | 3.9E-04 | 0.022 | 4.1E-04 |
| Indonesia Banjar                    | 0.104 | 8.5E-04 | 0.104 | 8.7E-04 | 0.101 | 9.0E-04 | 0.133 | 8.8E-04 | 0.135 | 8.9E-04 | 0.129 | 8.8E-04 |
| Indonesia Bugis                     | 0.105 | 8.4E-04 | 0.105 | 8.8E-04 | 0.102 | 8.8E-04 | 0.133 | 8.6E-04 | 0.135 | 8.6E-04 | 0.13  | 8.5E-04 |
| Indonesia Dayak                     | 0.108 | 8.5E-04 | 0.108 | 8.9E-04 | 0.105 | 8.9E-04 | 0.137 | 8.8E-04 | 0.139 | 8.9E-04 | 0.134 | 8.8E-04 |
| Indonesia Dayak Ngaju               | 0.107 | 8.7E-04 | 0.107 | 8.9E-04 | 0.105 | 9.0E-04 | 0.136 | 8.8E-04 | 0.138 | 8.9E-04 | 0.133 | 8.8E-04 |
| Indonesia Lebbo                     | 0.126 | 1.0E-03 | 0.126 | 1.0E-03 | 0.124 | 1.0E-03 | 0.155 | 1.0E-03 | 0.156 | 1.1E-03 | 0.151 | 1.0E-03 |
| Indonesia Maanyan                   | 0.113 | 8.8E-04 | 0.113 | 9.1E-04 | 0.11  | 9.2E-04 | 0.142 | 9.1E-04 | 0.144 | 9.2E-04 | 0.139 | 9.0E-04 |
| Indonesia Samihim                   | 0.114 | 9.4E-04 | 0.115 | 9.3E-04 | 0.112 | 9.5E-04 | 0.144 | 9.5E-04 | 0.145 | 9.6E-04 | 0.14  | 9.3E-04 |
| Indonesia Samihin                   | 0.101 | 8.4E-04 | 0.101 | 8.6E-04 | 0.098 | 8.5E-04 | 0.129 | 8.5E-04 | 0.131 | 8.6E-04 | 0.126 | 8.4E-04 |
| Irak Kurd Jew                       | 0.08  | 8.0E-04 | 0.08  | 8.2E-04 | 0.077 | 8.4E-04 | 0.102 | 8.1E-04 | 0.104 | 8.3E-04 | 0.097 | 8.2E-04 |
| Iran Azeri                          | 0.075 | 7.0E-04 | 0.076 | 7.1E-04 | 0.073 | 7.5E-04 | 0.098 | 6.9E-04 | 0.1   | 7.1E-04 | 0.093 | 6.9E-04 |
| Iran Iranian                        | 0.065 | 6.2E-04 | 0.066 | 6.3E-04 | 0.063 | 6.7E-04 | 0.087 | 6.3E-04 | 0.089 | 6.4E-04 | 0.082 | 6.2E-04 |
| Iran Iranian Jew                    | 0.085 | 8.1E-04 | 0.085 | 7.9E-04 | 0.082 | 8.4E-04 | 0.108 | 8.2E-04 | 0.109 | 8.3E-04 | 0.102 | 8.1E-04 |
| Iraq Iraqi Jews                     | 0.082 | 8.1E-04 | 0.083 | 8.1E-04 | 0.08  | 8.5E-04 | 0.105 | 8.2E-04 | 0.107 | 8.4E-04 | 0.099 | 8.1E-04 |
| Israel Bedouin                      | 0.072 | 7.0E-04 | 0.073 | 6.8E-04 | 0.07  | 7.3E-04 | 0.093 | 6.9E-04 | 0.095 | 7.1E-04 | 0.087 | 6.7E-04 |
| Israel Druze                        | 0.081 | 7.0E-04 | 0.082 | 7.0E-04 | 0.079 | 7.5E-04 | 0.104 | 7.0E-04 | 0.106 | 7.2E-04 | 0.098 | 6.9E-04 |
| Israel Palestinian                  | 0.071 | 6.7E-04 | 0.072 | 6.6E-04 | 0.069 | 7.3E-04 | 0.092 | 6.8E-04 | 0.094 | 7.0E-04 | 0.086 | 6.8E-04 |
| Italy East Sicilian                 | 0.234 | 1.3E-03 | 0.235 | 1.4E-03 | 0.233 | 1.4E-03 | 0.246 | 1.3E-03 | 0.247 | 1.3E-03 | 0.247 | 1.4E-03 |
| Italy Italian Abruzzo               | 0.083 | 8.0E-04 | 0.084 | 7.8E-04 | 0.081 | 8.5E-04 | 0.106 | 8.1E-04 | 0.108 | 8.1E-04 | 0.101 | 8.0E-04 |
| Italy Italian Bergamo               | 0.087 | 8.3E-04 | 0.088 | 8.1E-04 | 0.085 | 8.6E-04 | 0.11  | 8.2E-04 | 0.112 | 8.4E-04 | 0.105 | 8.1E-04 |
| Italy Sardinian                     | 0.095 | 7.6E-04 | 0.096 | 7.7E-04 | 0.093 | 8.2E-04 | 0.117 | 7.8E-04 | 0.119 | 8.1E-04 | 0.112 | 7.6E-04 |
| Italy Sicilian                      | 0.08  | 7.6E-04 | 0.081 | 7.5E-04 | 0.077 | 8.0E-04 | 0.102 | 7.5E-04 | 0.104 | 7.8E-04 | 0.097 | 7.4E-04 |
| Italy South Italian                 | 0.236 | 1.3E-03 | 0.237 | 1.3E-03 | 0.234 | 1.3E-03 | 0.247 | 1.3E-03 | 0.248 | 1.3E-03 | 0.248 | 1.3E-03 |
| Italy Tuscan                        | 0.084 | 7.5E-04 | 0.085 | 7.4E-04 | 0.082 | 7.8E-04 | 0.107 | 7.3E-04 | 0.109 | 7.5E-04 | 0.102 | 7.4E-04 |
| Italy West Sicilian                 | 0.235 | 1.4E-03 | 0.236 | 1.4E-03 | 0.234 | 1.4E-03 | 0.247 | 1.3E-03 | 0.248 | 1.3E-03 | 0.248 | 1.4E-03 |
| Jordania Jordanian                  | 0.065 | 6.5E-04 | 0.066 | 6.7E-04 | 0.063 | 7.2E-04 | 0.085 | 6.8E-04 | 0.087 | 7.1E-04 | 0.08  | 6.6E-04 |
| Kazakhstan Kurd                     | 0.079 | 8.8E-04 | 0.08  | 9.1E-04 | 0.078 | 9.3E-04 | 0.103 | 8.8E-04 | 0.104 | 8.9E-04 | 0.097 | 8.8E-04 |
| Kenya BantuKenya                    | 0.01  | 3.8E-04 | 0.012 | 3.9E-04 | 0.01  | 3.7E-04 | 0.004 | 2.8E-04 | 0.004 | 2.8E-04 | 0.003 | 2.9E-04 |
| Kenya Luhya                         | 0.01  | 2.8E-04 | 0.012 | 3.1E-04 | 0.01  | 2.8E-04 | 0.004 | 1.7E-04 | 0.004 | 1.7E-04 | 0.003 | 1.7E-04 |
| Kenya Samburu                       | 0.024 | 4.4E-04 | 0.025 | 4.5E-04 | 0.022 | 4.7E-04 | 0.027 | 4.6E-04 | 0.028 | 4.7E-04 | 0.023 | 4.3E-04 |
| Kenya Swahili Kilifi                | 0.008 | 2.6E-04 | 0.01  | 2.9E-04 | 0.007 | 2.7E-04 | -     | -       | 0.001 | 1.5E-04 | 0.001 | 1.8E-04 |
| Kenya Swahili Lamu                  | 0.009 | 2.7E-04 | 0.01  | 2.8E-04 | 0.008 | 2.8E-04 | 0.001 | 1.5E-04 | -     | -       | 0.002 | 1.7E-04 |



|                                |       |         |       |         |       |         |       |         |       |         |       |         |
|--------------------------------|-------|---------|-------|---------|-------|---------|-------|---------|-------|---------|-------|---------|
| Kenya Swahili Mombasa          | 0.008 | 2.8E-04 | 0.01  | 2.9E-04 | 0.007 | 2.8E-04 | 0.001 | 1.8E-04 | 0.002 | 1.7E-04 | -     | -       |
| Kenya Turkana                  | 0.017 | 4.5E-04 | 0.018 | 4.5E-04 | 0.016 | 4.6E-04 | 0.023 | 4.6E-04 | 0.024 | 4.6E-04 | 0.019 | 4.2E-04 |
| Lebanon Lebanese               | 0.073 | 8.1E-04 | 0.074 | 8.3E-04 | 0.071 | 8.7E-04 | 0.095 | 8.2E-04 | 0.097 | 8.4E-04 | 0.089 | 8.3E-04 |
| Lebanon Lebanese Christian     | 0.081 | 7.1E-04 | 0.081 | 7.0E-04 | 0.078 | 7.5E-04 | 0.103 | 6.9E-04 | 0.105 | 7.1E-04 | 0.097 | 6.9E-04 |
| Lebanon Lebanese Druze         | 0.079 | 7.2E-04 | 0.08  | 7.0E-04 | 0.077 | 7.4E-04 | 0.102 | 7.0E-04 | 0.103 | 7.2E-04 | 0.096 | 6.9E-04 |
| Lebanon Lebanese Muslim        | 0.074 | 6.7E-04 | 0.075 | 6.7E-04 | 0.072 | 7.2E-04 | 0.096 | 6.6E-04 | 0.098 | 6.8E-04 | 0.091 | 6.6E-04 |
| Lybia Lybian Jew               | 0.082 | 9.8E-04 | 0.083 | 9.4E-04 | 0.08  | 9.8E-04 | 0.104 | 9.7E-04 | 0.106 | 9.8E-04 | 0.099 | 9.6E-04 |
| Malaysia Malay                 | 0.095 | 8.0E-04 | 0.095 | 8.2E-04 | 0.092 | 8.4E-04 | 0.123 | 8.4E-04 | 0.125 | 8.4E-04 | 0.12  | 8.3E-04 |
| Morocco Moroccan               | 0.106 | 7.3E-04 | 0.107 | 7.4E-04 | 0.105 | 7.4E-04 | 0.119 | 7.3E-04 | 0.12  | 7.3E-04 | 0.118 | 7.2E-04 |
| Namibia Damara                 | 0.021 | 4.9E-04 | 0.023 | 5.1E-04 | 0.021 | 5.2E-04 | 0.015 | 4.4E-04 | 0.015 | 4.3E-04 | 0.015 | 4.6E-04 |
| Namibia Haihom                 | 0.036 | 6.6E-04 | 0.037 | 6.6E-04 | 0.035 | 6.5E-04 | 0.032 | 6.3E-04 | 0.033 | 5.9E-04 | 0.031 | 6.2E-04 |
| Namibia Juhoansi               | 0.096 | 8.9E-04 | 0.098 | 8.4E-04 | 0.095 | 8.5E-04 | 0.092 | 8.1E-04 | 0.093 | 8.2E-04 | 0.092 | 8.4E-04 |
| Namibia Kwangali               | 0.012 | 4.8E-04 | 0.014 | 4.9E-04 | 0.012 | 4.6E-04 | 0.005 | 3.8E-04 | 0.006 | 3.8E-04 | 0.006 | 4.1E-04 |
| Namibia Mbukushu               | 0.014 | 4.6E-04 | 0.016 | 4.7E-04 | 0.013 | 4.7E-04 | 0.007 | 3.6E-04 | 0.007 | 3.7E-04 | 0.008 | 3.8E-04 |
| Namibia Nama                   | 0.039 | 5.0E-04 | 0.04  | 4.9E-04 | 0.038 | 4.8E-04 | 0.038 | 4.6E-04 | 0.039 | 4.7E-04 | 0.036 | 4.7E-04 |
| Nigeria Esan                   | 0.014 | 3.1E-04 | 0.015 | 3.2E-04 | 0.013 | 3.2E-04 | 0.007 | 1.9E-04 | 0.007 | 1.9E-04 | 0.008 | 2.2E-04 |
| Nigeria Yoruba                 | 0.013 | 3.1E-04 | 0.015 | 3.1E-04 | 0.013 | 3.1E-04 | 0.007 | 1.9E-04 | 0.007 | 1.9E-04 | 0.007 | 1.9E-04 |
| Oman Omani                     | 0.04  | 4.9E-04 | 0.041 | 5.2E-04 | 0.038 | 5.3E-04 | 0.057 | 5.1E-04 | 0.058 | 5.2E-04 | 0.053 | 4.9E-04 |
| Pakistan Balochi               | 0.074 | 6.8E-04 | 0.075 | 6.9E-04 | 0.071 | 7.3E-04 | 0.097 | 6.9E-04 | 0.098 | 7.0E-04 | 0.092 | 6.7E-04 |
| Pakistan Brahui                | 0.075 | 6.8E-04 | 0.076 | 6.9E-04 | 0.073 | 7.4E-04 | 0.098 | 7.0E-04 | 0.1   | 7.1E-04 | 0.093 | 6.7E-04 |
| Pakistan Burusho               | 0.074 | 6.7E-04 | 0.075 | 6.7E-04 | 0.072 | 7.1E-04 | 0.098 | 6.7E-04 | 0.1   | 6.8E-04 | 0.094 | 6.8E-04 |
| Pakistan Hazara                | 0.074 | 7.1E-04 | 0.074 | 7.2E-04 | 0.071 | 7.5E-04 | 0.099 | 7.0E-04 | 0.102 | 7.2E-04 | 0.095 | 6.9E-04 |
| Pakistan Kalash                | 0.098 | 8.3E-04 | 0.1   | 8.2E-04 | 0.097 | 8.8E-04 | 0.122 | 8.5E-04 | 0.124 | 8.5E-04 | 0.118 | 8.5E-04 |
| Pakistan Makrani               | 0.07  | 6.6E-04 | 0.071 | 6.6E-04 | 0.068 | 7.2E-04 | 0.093 | 7.0E-04 | 0.095 | 6.9E-04 | 0.088 | 6.7E-04 |
| Pakistan Pathan                | 0.072 | 6.4E-04 | 0.073 | 6.6E-04 | 0.07  | 6.9E-04 | 0.096 | 6.5E-04 | 0.098 | 6.6E-04 | 0.092 | 6.4E-04 |
| Pakistan Punjabi               | 0.076 | 7.9E-04 | 0.077 | 7.8E-04 | 0.074 | 8.1E-04 | 0.1   | 7.8E-04 | 0.102 | 8.0E-04 | 0.096 | 7.9E-04 |
| Pakistan Sindhi                | 0.071 | 6.5E-04 | 0.072 | 6.4E-04 | 0.069 | 7.0E-04 | 0.095 | 6.5E-04 | 0.097 | 6.7E-04 | 0.091 | 6.5E-04 |
| Papua New Guinea Papuan        | 0.192 | 1.5E-03 | 0.191 | 1.5E-03 | 0.19  | 1.6E-03 | 0.212 | 1.6E-03 | 0.215 | 1.6E-03 | 0.21  | 1.6E-03 |
| Philippines Igorot             | 0.14  | 1.0E-03 | 0.14  | 9.8E-04 | 0.137 | 1.0E-03 | 0.169 | 1.0E-03 | 0.17  | 1.0E-03 | 0.166 | 1.0E-03 |
| Romania Romanian               | 0.082 | 7.3E-04 | 0.082 | 7.2E-04 | 0.08  | 7.8E-04 | 0.105 | 7.4E-04 | 0.107 | 7.5E-04 | 0.1   | 7.3E-04 |
| Russia Azeri                   | 0.079 | 9.4E-04 | 0.079 | 9.1E-04 | 0.077 | 9.3E-04 | 0.102 | 9.4E-04 | 0.104 | 9.6E-04 | 0.097 | 9.4E-04 |
| Saudi Arabia Arab              | 0.065 | 6.2E-04 | 0.066 | 6.5E-04 | 0.063 | 6.9E-04 | 0.084 | 6.6E-04 | 0.086 | 6.7E-04 | 0.078 | 6.5E-04 |
| Saudi Arabia Saudi             | 0.073 | 6.9E-04 | 0.074 | 7.0E-04 | 0.071 | 7.6E-04 | 0.094 | 7.1E-04 | 0.096 | 7.3E-04 | 0.088 | 6.9E-04 |
| Senegal Mandenka               | 0.019 | 3.3E-04 | 0.02  | 3.4E-04 | 0.018 | 3.4E-04 | 0.013 | 2.3E-04 | 0.013 | 2.4E-04 | 0.013 | 2.6E-04 |
| Sierra Leone Mende             | 0.015 | 3.0E-04 | 0.017 | 3.0E-04 | 0.015 | 3.1E-04 | 0.009 | 1.9E-04 | 0.009 | 1.8E-04 | 0.009 | 2.0E-04 |
| Singapore Malay                | 0.097 | 8.1E-04 | 0.097 | 8.3E-04 | 0.094 | 8.6E-04 | 0.125 | 8.4E-04 | 0.127 | 8.4E-04 | 0.122 | 8.4E-04 |
| Somalia Somali                 | 0.027 | 3.9E-04 | 0.028 | 3.9E-04 | 0.025 | 3.7E-04 | 0.032 | 3.8E-04 | 0.033 | 4.0E-04 | 0.028 | 3.6E-04 |
| South Africa Namibia Khwe      | 0.024 | 4.2E-04 | 0.025 | 4.2E-04 | 0.024 | 4.2E-04 | 0.019 | 3.6E-04 | 0.019 | 3.6E-04 | 0.019 | 3.5E-04 |
| South Africa Namibia Xun       | 0.064 | 7.4E-04 | 0.065 | 7.0E-04 | 0.063 | 7.1E-04 | 0.059 | 6.7E-04 | 0.059 | 7.0E-04 | 0.059 | 7.0E-04 |
| South Africa Bantu Soweto      | 0.012 | 3.2E-04 | 0.014 | 3.1E-04 | 0.012 | 3.2E-04 | 0.006 | 1.9E-04 | 0.006 | 2.0E-04 | 0.007 | 2.1E-04 |
| South Africa BantuSA           | 0.012 | 4.5E-04 | 0.014 | 4.6E-04 | 0.011 | 4.5E-04 | 0.005 | 3.6E-04 | 0.005 | 3.6E-04 | 0.006 | 3.7E-04 |
| South Africa ColouredColesberg | 0.018 | 3.7E-04 | 0.019 | 3.7E-04 | 0.017 | 3.5E-04 | 0.022 | 3.4E-04 | 0.023 | 3.6E-04 | 0.02  | 3.6E-04 |

|                                 |       |         |       |         |       |         |       |         |       |         |       |         |
|---------------------------------|-------|---------|-------|---------|-------|---------|-------|---------|-------|---------|-------|---------|
| South Africa ColouredWellington | 0.021 | 3.6E-04 | 0.022 | 3.8E-04 | 0.019 | 4.1E-04 | 0.034 | 4.2E-04 | 0.035 | 4.4E-04 | 0.031 | 4.2E-04 |
| South Africa Karretjie          | 0.054 | 6.3E-04 | 0.056 | 6.3E-04 | 0.053 | 6.4E-04 | 0.053 | 6.0E-04 | 0.054 | 6.1E-04 | 0.052 | 6.1E-04 |
| South Africa Khomani            | 0.044 | 5.3E-04 | 0.045 | 5.1E-04 | 0.043 | 5.0E-04 | 0.045 | 4.8E-04 | 0.046 | 4.9E-04 | 0.044 | 4.9E-04 |
| South Africa SEBantu            | 0.013 | 3.1E-04 | 0.015 | 3.3E-04 | 0.012 | 3.1E-04 | 0.006 | 2.1E-04 | 0.006 | 2.2E-04 | 0.007 | 2.2E-04 |
| South Africa SWBantu            | 0.016 | 4.0E-04 | 0.018 | 4.2E-04 | 0.015 | 4.2E-04 | 0.012 | 3.4E-04 | 0.012 | 3.2E-04 | 0.012 | 3.4E-04 |
| Spain Spanish                   | 0.075 | 6.7E-04 | 0.076 | 6.6E-04 | 0.073 | 7.0E-04 | 0.096 | 6.6E-04 | 0.098 | 6.9E-04 | 0.092 | 6.6E-04 |
| Sri Lanka Sri Lankan            | 0.074 | 6.7E-04 | 0.075 | 6.8E-04 | 0.072 | 7.0E-04 | 0.098 | 6.7E-04 | 0.1   | 6.8E-04 | 0.094 | 6.7E-04 |
| Sudan Arab                      | 0.032 | 4.6E-04 | 0.033 | 4.7E-04 | 0.03  | 4.8E-04 | 0.042 | 5.0E-04 | 0.043 | 5.0E-04 | 0.037 | 4.7E-04 |
| Sudan Nubian                    | 0.033 | 4.8E-04 | 0.035 | 5.1E-04 | 0.032 | 5.4E-04 | 0.044 | 5.4E-04 | 0.046 | 5.5E-04 | 0.039 | 5.4E-04 |
| Sudan Sudanese                  | 0.026 | 3.6E-04 | 0.027 | 3.9E-04 | 0.025 | 3.7E-04 | 0.021 | 3.0E-04 | 0.021 | 3.0E-04 | 0.017 | 2.7E-04 |
| Syria Syrians                   | 0.071 | 7.2E-04 | 0.072 | 7.2E-04 | 0.069 | 7.7E-04 | 0.093 | 7.3E-04 | 0.095 | 7.4E-04 | 0.088 | 7.2E-04 |
| Tanzania Hazda                  | 0.06  | 7.8E-04 | 0.061 | 7.6E-04 | 0.059 | 8.0E-04 | 0.057 | 7.4E-04 | 0.058 | 7.6E-04 | 0.055 | 7.6E-04 |
| Tanzania San                    | 0.052 | 6.0E-04 | 0.054 | 5.7E-04 | 0.052 | 5.9E-04 | 0.051 | 5.5E-04 | 0.052 | 5.6E-04 | 0.05  | 5.5E-04 |
| Tanzania Sandawe                | 0.021 | 3.5E-04 | 0.023 | 3.5E-04 | 0.02  | 3.4E-04 | 0.02  | 2.9E-04 | 0.021 | 3.0E-04 | 0.018 | 3.0E-04 |
| Tunisia Tunisian                | 0.228 | 1.4E-03 | 0.228 | 1.4E-03 | 0.226 | 1.4E-03 | 0.239 | 1.4E-03 | 0.24  | 1.4E-03 | 0.24  | 1.4E-03 |
| Turkey Turks                    | 0.076 | 7.2E-04 | 0.077 | 7.2E-04 | 0.074 | 7.8E-04 | 0.099 | 7.1E-04 | 0.102 | 7.4E-04 | 0.094 | 7.1E-04 |
| Turkmenistan Turkmen            | 0.073 | 7.6E-04 | 0.073 | 7.7E-04 | 0.07  | 7.9E-04 | 0.096 | 7.5E-04 | 0.099 | 7.7E-04 | 0.092 | 7.7E-04 |
| UAE Arab                        | 0.228 | 1.4E-03 | 0.229 | 1.4E-03 | 0.227 | 1.4E-03 | 0.24  | 1.3E-03 | 0.241 | 1.4E-03 | 0.241 | 1.4E-03 |
| Uganda Bakiga                   | 0.011 | 2.7E-04 | 0.012 | 2.9E-04 | 0.009 | 2.6E-04 | 0.005 | 1.8E-04 | 0.005 | 1.9E-04 | 0.004 | 2.0E-04 |
| Uganda Batwa                    | 0.045 | 5.6E-04 | 0.047 | 5.9E-04 | 0.045 | 5.8E-04 | 0.04  | 5.3E-04 | 0.041 | 5.3E-04 | 0.04  | 5.3E-04 |
| USA CEU                         | 0.088 | 7.8E-04 | 0.089 | 7.5E-04 | 0.086 | 8.1E-04 | 0.111 | 7.6E-04 | 0.114 | 8.0E-04 | 0.107 | 7.5E-04 |
| Vietnam Kinh                    | 0.107 | 8.8E-04 | 0.107 | 8.9E-04 | 0.104 | 9.1E-04 | 0.135 | 9.0E-04 | 0.137 | 9.1E-04 | 0.132 | 8.9E-04 |
| Vietnam Vietnamese              | 0.109 | 9.2E-04 | 0.108 | 9.3E-04 | 0.105 | 9.5E-04 | 0.137 | 9.4E-04 | 0.138 | 9.6E-04 | 0.133 | 9.4E-04 |
| Yemen Yemeni                    | 0.065 | 6.4E-04 | 0.067 | 6.4E-04 | 0.064 | 7.1E-04 | 0.085 | 6.4E-04 | 0.087 | 6.6E-04 | 0.079 | 6.2E-04 |
| Yemen Yemenite Jews             | 0.08  | 7.7E-04 | 0.081 | 7.5E-04 | 0.078 | 8.0E-04 | 0.101 | 7.8E-04 | 0.103 | 8.0E-04 | 0.095 | 7.8E-04 |

Table S8. Pairwise  $F_{ST}$  values obtained for Comoros and Swahili groups and each population of the low SNP density dataset. S.D: standard deviation.

| Target                    | Source1                   | Source2            | $f\beta$  | SE       | Z       |
|---------------------------|---------------------------|--------------------|-----------|----------|---------|
| Comoros Comoros Anjouan   | South Africa Bantu Soweto | Indonesia Lebbo    | -0.014295 | 0.000336 | -42.503 |
| Comoros Comoros Anjouan   | South Africa Bantu Soweto | Indonesia Banjar   | -0.014289 | 0.000306 | -46.694 |
| Comoros Comoros Anjouan   | South Africa Bantu Soweto | Brunei Dusun       | -0.014259 | 0.000315 | -45.288 |
| Comoros Comoros Anjouan   | South Africa Bantu Soweto | Indonesia Samihim  | -0.014255 | 0.00032  | -44.556 |
| Comoros Comoros Anjouan   | South Africa Bantu Soweto | Philippines Igorot | -0.01424  | 0.000342 | -41.582 |
| Comoros Comoros GdeComore | South Africa Bantu Soweto | Philippines Igorot | -0.013771 | 0.000348 | -39.568 |
| Comoros Comoros GdeComore | South Africa Bantu Soweto | Brunei Dusun       | -0.013715 | 0.000331 | -41.441 |
| Comoros Comoros GdeComore | South Africa Bantu Soweto | Indonesia Samihim  | -0.013666 | 0.000333 | -41.079 |
| Comoros Comoros GdeComore | South Africa Bantu Soweto | Brunei Murut       | -0.013652 | 0.000331 | -41.212 |
| Comoros Comoros GdeComore | South Africa Bantu Soweto | Indonesia Banjar   | -0.013615 | 0.000316 | -43.064 |
| Comoros Comoros Moheli    | South Africa Bantu Soweto | Brunei Murut       | -0.015918 | 0.000319 | -49.966 |
| Comoros Comoros Moheli    | South Africa Bantu Soweto | Philippines Igorot | -0.01584  | 0.000344 | -46.096 |
| Comoros Comoros Moheli    | South Africa Bantu Soweto | Brunei Dusun       | -0.015838 | 0.000311 | -51.003 |
| Comoros Comoros Moheli    | South Africa Bantu Soweto | Indonesia Banjar   | -0.015802 | 0.000306 | -51.611 |
| Comoros Comoros Moheli    | South Africa Bantu Soweto | Indonesia Dayak    | -0.015794 | 0.000307 | -51.402 |
| Kenya Swahili Kilifi      | Namibia Kwangali          | Italy Tuscan       | -0.005091 | 0.000341 | -14.914 |
| Kenya Swahili Kilifi      | Gabon Bongo               | Italy Tuscan       | -0.005044 | 0.0003   | -16.802 |
| Kenya Swahili Kilifi      | Gabon Nzebi               | Italy Tuscan       | -0.004989 | 0.000266 | -18.748 |
| Kenya Swahili Kilifi      | Namibia Kwangali          | Spain Spanish      | -0.004981 | 0.000342 | -14.553 |
| Kenya Swahili Kilifi      | South Africa Bantu Soweto | Italy Tuscan       | -0.004956 | 0.000264 | -18.782 |
| Kenya Swahili Lamu        | Gabon Nzebi               | Italy Tuscan       | -0.004002 | 0.00026  | -15.405 |
| Kenya Swahili Lamu        | Gabon Bongo               | Italy Tuscan       | -0.003928 | 0.000295 | -13.303 |
| Kenya Swahili Lamu        | South Africa Bantu Soweto | Italy Tuscan       | -0.003797 | 0.000259 | -14.645 |
| Kenya Swahili Lamu        | Gabon Nzebi               | Spain Spanish      | -0.003787 | 0.000261 | -14.523 |
| Kenya Swahili Lamu        | Gabon Bongo               | Spain Spanish      | -0.003764 | 0.000302 | -12.47  |
| Kenya Swahili Mombasa     | Gabon Nzebi               | Italy Tuscan       | -0.008843 | 0.00028  | -31.567 |
| Kenya Swahili Mombasa     | Gabon Bongo               | Italy Tuscan       | -0.008788 | 0.000309 | -28.407 |
| Kenya Swahili Mombasa     | Namibia Kwangali          | Italy Tuscan       | -0.008725 | 0.000343 | -25.47  |
| Kenya Swahili Mombasa     | Namibia Mbukushu          | Italy Tuscan       | -0.008607 | 0.000351 | -24.523 |
| Kenya Swahili Mombasa     | South Africa Bantu Soweto | Italy Tuscan       | -0.008536 | 0.000275 | -30.986 |
| Madagascar Antemoro       | South Africa Bantu Soweto | Philippines Igorot | -0.026794 | 0.0003   | -89.298 |
| Madagascar Antemoro       | South Africa Bantu Soweto | Brunei Murut       | -0.026499 | 0.000273 | -96.966 |
| Madagascar Antemoro       | Gabon Nzebi               | Philippines Igorot | -0.026363 | 0.00031  | -85.073 |
| Madagascar Antemoro       | South Africa Bantu Soweto | Indonesia Samihim  | -0.026347 | 0.000267 | -98.628 |
| Madagascar Antemoro       | Namibia Kwangali          | Philippines Igorot | -0.026346 | 0.000367 | -71.883 |
| Madagascar Mikea          | South Africa Bantu Soweto | Philippines Igorot | -0.022797 | 0.000337 | -67.718 |
| Madagascar Mikea          | South Africa Bantu Soweto | Brunei Murut       | -0.022686 | 0.000305 | -74.284 |
| Madagascar Mikea          | Namibia Mbukushu          | Philippines Igorot | -0.022537 | 0.000406 | -55.549 |
| Madagascar Mikea          | Gabon Nzebi               | Philippines Igorot | -0.022434 | 0.000341 | -65.867 |
| Madagascar Mikea          | South Africa Bantu Soweto | Brunei Dusun       | -0.022404 | 0.000312 | -71.731 |
| Madagascar Vezo           | South Africa Bantu Soweto | Philippines Igorot | -0.026676 | 0.0003   | -88.99  |
| Madagascar Vezo           | South Africa Bantu Soweto | Brunei Murut       | -0.026582 | 0.000276 | -96.337 |
| Madagascar Vezo           | Gabon Nzebi               | Philippines Igorot | -0.026381 | 0.000299 | -88.128 |
| Madagascar Vezo           | South Africa Bantu Soweto | Indonesia Samihim  | -0.026322 | 0.000273 | -96.527 |

|                 |                           |              |           |          |        |
|-----------------|---------------------------|--------------|-----------|----------|--------|
| Madagascar Vezo | South Africa Bantu Soweto | Brunei Dusun | -0.026217 | 0.000282 | -93.09 |
|-----------------|---------------------------|--------------|-----------|----------|--------|

Table S9.  $f_3$ -statistics for Comoros and Swahili populations. For each studied group, the 5-top lowest results are shown, with their respective standard error (SE) and Z-score (Z).

|                           | Comoros Comoros Anjouan | Comoros Comoros GdeComore | Comoros Comoros Moheli | Kenya Swahili Kilifi | Kenya Swahili Lamu | Kenya Swahili Mombasa | Comoros Comoros Anjouan |       |         | Comoros Comoros GdeComore |       |         | Comoros Comoros Moheli |       |         | Kenya Swahili Kilifi |       |         | Kenya Swahili Lamu |       |         | Kenya Swahili Mombasa |       |         |
|---------------------------|-------------------------|---------------------------|------------------------|----------------------|--------------------|-----------------------|-------------------------|-------|---------|---------------------------|-------|---------|------------------------|-------|---------|----------------------|-------|---------|--------------------|-------|---------|-----------------------|-------|---------|
|                           | Fst                     |                           |                        |                      |                    |                       | f3                      | SE    | Z       | f3                        | SE    | Z       | f3                     | SE    | Z       | f3                   | SE    | Z       | f3                 | SE    | Z       | f3                    | SE    | Z       |
| Kenya Swahili Lamu        | 0,006                   | 0,007                     | 0,003                  | 0,001                | 0,000              | 0,002                 | 0,164                   | 0,002 | 100,827 | 0,164                     | 0,002 | 100,328 | 0,164                  | 0,002 | 86,508  | 0,161                | 0,002 | 70,670  | -                  | -     | -       | 0,158                 | 0,001 | 210,130 |
| Kenya Swahili Kilifi      | 0,005                   | 0,007                     | 0,003                  | 0,000                | 0,001              | 0,001                 | 0,163                   | 0,002 | 68,981  | 0,163                     | 0,002 | 68,652  | 0,163                  | 0,003 | 59,670  | -                    | -     | -       | 0,161              | 0,002 | 70,670  | 0,158                 | 0,001 | 193,349 |
| Kenya Swahili Mombasa     | 0,006                   | 0,008                     | 0,003                  | 0,001                | 0,002              | 0,000                 | 0,161                   | 0,001 | 193,492 | 0,160                     | 0,001 | 190,211 | 0,161                  | 0,001 | 233,809 | 0,158                | 0,001 | 193,349 | 0,158              | 0,001 | 210,130 | -                     | -     | -       |
| Comoros Comoros Moheli    | 0,003                   | 0,006                     | 0,000                  | 0,003                | 0,003              | 0,003                 | 0,169                   | 0,002 | 86,230  | 0,168                     | 0,002 | 85,266  | -                      | -     | -       | 0,163                | 0,003 | 59,670  | 0,164              | 0,002 | 86,508  | 0,161                 | 0,001 | 233,809 |
| Kenya BantuKenya          | 0,008                   | 0,009                     | 0,004                  | 0,003                | 0,004              | 0,002                 | 0,162                   | 0,002 | 73,763  | 0,162                     | 0,002 | 73,493  | 0,162                  | 0,003 | 63,820  | 0,159                | 0,003 | 52,931  | 0,159              | 0,002 | 75,219  | 0,157                 | 0,001 | 209,148 |
| Kenya Luhya               | 0,007                   | 0,010                     | 0,006                  | 0,004                | 0,004              | 0,002                 | 0,163                   | 0,002 | 100,013 | 0,162                     | 0,002 | 98,570  | 0,163                  | 0,002 | 85,322  | 0,160                | 0,002 | 69,537  | 0,160              | 0,002 | 102,972 | 0,158                 | 0,001 | 199,907 |
| Madagascar Antemoro       | 0,006                   | 0,008                     | 0,003                  | 0,005                | 0,005              | 0,005                 | 0,166                   | 0,003 | 63,164  | 0,165                     | 0,003 | 62,806  | 0,166                  | 0,003 | 54,927  | 0,161                | 0,004 | 45,331  | 0,162              | 0,003 | 63,316  | 0,159                 | 0,001 | 184,011 |
| Gabon Nzebi               | 0,007                   | 0,008                     | 0,004                  | 0,006                | 0,005              | 0,006                 | 0,170                   | 0,001 | 199,705 | 0,170                     | 0,001 | 192,952 | 0,170                  | 0,001 | 226,453 | 0,166                | 0,001 | 154,187 | 0,167              | 0,001 | 236,740 | 0,163                 | 0,001 | 138,846 |
| Uganda Bakiga             | 0,009                   | 0,010                     | 0,007                  | 0,005                | 0,005              | 0,004                 | 0,162                   | 0,001 | 193,665 | 0,161                     | 0,001 | 191,782 | 0,162                  | 0,001 | 186,401 | 0,158                | 0,001 | 148,042 | 0,159              | 0,001 | 203,379 | 0,157                 | 0,001 | 135,253 |
| Comoros Comoros Anjouan   | 0,000                   | 0,008                     | 0,003                  | 0,005                | 0,006              | 0,006                 | -                       | -     | -       | 0,168                     | 0,002 | 100,117 | 0,169                  | 0,002 | 86,230  | 0,163                | 0,002 | 68,981  | 0,164              | 0,002 | 100,827 | 0,161                 | 0,001 | 193,492 |
| South Africa BantuSA      | 0,007                   | 0,008                     | 0,008                  | 0,006                | 0,006              | 0,007                 | 0,168                   | 0,001 | 114,425 | 0,168                     | 0,001 | 115,777 | 0,166                  | 0,002 | 91,241  | 0,163                | 0,002 | 78,213  | 0,164              | 0,001 | 109,946 | 0,161                 | 0,001 | 163,480 |
| South Africa Bantu Soweto | 0,007                   | 0,010                     | 0,005                  | 0,005                | 0,006              | 0,006                 | 0,169                   | 0,003 | 67,603  | 0,168                     | 0,003 | 67,136  | 0,169                  | 0,003 | 58,737  | 0,165                | 0,003 | 48,562  | 0,165              | 0,002 | 68,272  | 0,162                 | 0,001 | 190,650 |
| Cameroon Nzime            | 0,007                   | 0,010                     | 0,007                  | 0,005                | 0,006              | 0,006                 | 0,168                   | 0,001 | 149,563 | 0,168                     | 0,001 | 150,533 | 0,167                  | 0,001 | 119,873 | 0,164                | 0,002 | 102,644 | 0,164              | 0,001 | 142,309 | 0,161                 | 0,001 | 150,546 |
| Comoros Comoros GdeComore | 0,008                   | 0,000                     | 0,006                  | 0,007                | 0,007              | 0,008                 | 0,168                   | 0,002 | 100,117 | -                         | -     | -       | 0,168                  | 0,002 | 85,266  | 0,163                | 0,002 | 68,652  | 0,164              | 0,002 | 100,328 | 0,160                 | 0,001 | 190,211 |
| Namibia Kwangali          | 0,007                   | 0,009                     | 0,006                  | 0,006                | 0,007              | 0,006                 | 0,170                   | 0,001 | 196,929 | 0,170                     | 0,001 | 199,967 | 0,170                  | 0,001 | 179,343 | 0,166                | 0,001 | 181,417 | 0,166              | 0,001 | 184,233 | 0,163                 | 0,001 | 119,373 |
| Madagascar Vezo           | 0,008                   | 0,010                     | 0,007                  | 0,007                | 0,007              | 0,007                 | 0,167                   | 0,002 | 108,468 | 0,166                     | 0,002 | 107,788 | 0,166                  | 0,002 | 91,434  | 0,162                | 0,002 | 73,899  | 0,163              | 0,001 | 108,948 | 0,160                 | 0,001 | 186,237 |
| South Africa SEBantu      | 0,008                   | 0,010                     | 0,007                  | 0,006                | 0,007              | 0,007                 | 0,168                   | 0,002 | 100,445 | 0,168                     | 0,002 | 100,064 | 0,167                  | 0,002 | 85,122  | 0,164                | 0,002 | 69,380  | 0,164              | 0,002 | 101,181 | 0,161                 | 0,001 | 191,501 |
| Nigeria Yoruba            | 0,009                   | 0,011                     | 0,006                  | 0,007                | 0,007              | 0,007                 | 0,168                   | 0,002 | 105,879 | 0,168                     | 0,002 | 105,436 | 0,169                  | 0,002 | 90,703  | 0,164                | 0,002 | 73,065  | 0,165              | 0,002 | 107,255 | 0,162                 | 0,001 | 187,359 |
| Nigeria Esan              | 0,009                   | 0,012                     | 0,006                  | 0,007                | 0,008              | 0,008                 | 0,170                   | 0,001 | 170,295 | 0,169                     | 0,001 | 170,887 | 0,170                  | 0,001 | 140,380 | 0,165                | 0,001 | 119,330 | 0,166              | 0,001 | 161,935 | 0,162                 | 0,001 | 143,250 |
| Burkina Faso Gurmantche   | 0,009                   | 0,013                     | 0,008                  | 0,008                | 0,008              | 0,008                 | 0,166                   | 0,001 | 177,731 | 0,165                     | 0,001 | 184,755 | 0,166                  | 0,001 | 151,494 | 0,162                | 0,001 | 199,083 | 0,163              | 0,001 | 154,315 | 0,159                 | 0,001 | 106,666 |
| Namibia Mbukushu          | 0,010                   | 0,011                     | 0,008                  | 0,009                | 0,009              | 0,008                 | 0,170                   | 0,002 | 77,635  | 0,170                     | 0,002 | 78,035  | 0,170                  | 0,002 | 75,573  | 0,166                | 0,002 | 80,139  | 0,167              | 0,002 | 75,653  | 0,164                 | 0,002 | 72,243  |
| Burkina Faso Gurunsi      | 0,011                   | 0,013                     | 0,008                  | 0,009                | 0,009              | 0,009                 | 0,168                   | 0,002 | 83,345  | 0,168                     | 0,002 | 83,061  | 0,168                  | 0,002 | 71,288  | 0,164                | 0,003 | 58,562  | 0,164              | 0,002 | 83,366  | 0,161                 | 0,001 | 184,027 |
| Burkina Faso Mossi        | 0,012                   | 0,013                     | 0,009                  | 0,009                | 0,009              | 0,009                 | 0,167                   | 0,001 | 125,690 | 0,166                     | 0,001 | 128,407 | 0,167                  | 0,001 | 114,554 | 0,163                | 0,001 | 149,399 | 0,164              | 0,001 | 113,896 | 0,160                 | 0,002 | 89,744  |
| Sierra Leone Mende        | 0,010                   | 0,015                     | 0,008                  | 0,009                | 0,010              | 0,009                 | 0,168                   | 0,001 | 165,093 | 0,167                     | 0,001 | 165,652 | 0,168                  | 0,001 | 130,019 | 0,163                | 0,001 | 114,688 | 0,164              | 0,001 | 151,603 | 0,161                 | 0,001 | 141,944 |
| Madagascar Mikea          | 0,012                   | 0,016                     | 0,010                  | 0,011                | 0,011              | 0,012                 | 0,166                   | 0,001 | 194,634 | 0,165                     | 0,001 | 205,097 | 0,166                  | 0,001 | 142,706 | 0,161                | 0,001 | 175,532 | 0,162              | 0,001 | 157,361 | 0,158                 | 0,001 | 115,884 |
| Gambia Gambian            | 0,013                   | 0,016                     | 0,010                  | 0,010                | 0,011              | 0,010                 | 0,165                   | 0,001 | 163,114 | 0,164                     | 0,001 | 163,399 | 0,165                  | 0,001 | 134,410 | 0,161                | 0,001 | 113,523 | 0,161              | 0,001 | 156,175 | 0,158                 | 0,001 | 145,940 |
| South Africa SWBantu      | 0,015                   | 0,017                     | 0,014                  | 0,012                | 0,011              | 0,012                 | 0,162                   | 0,002 | 86,476  | 0,162                     | 0,002 | 86,073  | 0,162                  | 0,002 | 73,954  | 0,159                | 0,003 | 60,944  | 0,160              | 0,002 | 88,762  | 0,156                 | 0,001 | 204,097 |
| Chad Kanembu              | 0,016                   | 0,019                     | 0,014                  | 0,013                | 0,013              | 0,011                 | 0,153                   | 0,004 | 38,164  | 0,152                     | 0,004 | 37,904  | 0,153                  | 0,005 | 33,737  | 0,150                | 0,005 | 28,915  | 0,150              | 0,004 | 38,574  | 0,148                 | 0,001 | 108,278 |

|                                 |       |       |       |       |       |       |       |       |         |       |       |         |       |       |         |       |       |         |       |       |         |       |       |         |
|---------------------------------|-------|-------|-------|-------|-------|-------|-------|-------|---------|-------|-------|---------|-------|-------|---------|-------|-------|---------|-------|-------|---------|-------|-------|---------|
| Senegal Mandenka                | 0,016 | 0,019 | 0,013 | 0,014 | 0,015 | 0,013 | 0,165 | 0,001 | 193,251 | 0,165 | 0,001 | 195,438 | 0,166 | 0,001 | 165,267 | 0,161 | 0,001 | 149,493 | 0,161 | 0,001 | 181,557 | 0,159 | 0,001 | 129,865 |
| Namibia Damara                  | 0,016 | 0,018 | 0,015 | 0,015 | 0,017 | 0,016 | 0,168 | 0,002 | 83,566  | 0,168 | 0,002 | 83,410  | 0,168 | 0,002 | 70,520  | 0,164 | 0,003 | 58,459  | 0,164 | 0,002 | 82,238  | 0,161 | 0,001 | 177,922 |
| Gabon Bongo                     | 0,019 | 0,021 | 0,018 | 0,017 | 0,018 | 0,018 | 0,168 | 0,002 | 105,839 | 0,167 | 0,002 | 104,908 | 0,167 | 0,002 | 89,441  | 0,164 | 0,002 | 72,628  | 0,164 | 0,002 | 106,522 | 0,161 | 0,001 | 188,028 |
| South Africa Namibia Khwe       | 0,021 | 0,021 | 0,019 | 0,018 | 0,018 | 0,017 | 0,164 | 0,002 | 73,807  | 0,165 | 0,002 | 74,411  | 0,164 | 0,003 | 63,932  | 0,161 | 0,003 | 52,856  | 0,161 | 0,002 | 75,230  | 0,159 | 0,001 | 194,753 |
| Sudan Sudanese                  | 0,025 | 0,027 | 0,022 | 0,019 | 0,020 | 0,017 | 0,157 | 0,002 | 84,144  | 0,156 | 0,002 | 83,460  | 0,157 | 0,002 | 71,743  | 0,154 | 0,003 | 60,025  | 0,154 | 0,002 | 86,641  | 0,153 | 0,001 | 227,167 |
| Ethiopia Anuak                  | 0,025 | 0,028 | 0,024 | 0,020 | 0,021 | 0,017 | 0,157 | 0,002 | 97,953  | 0,156 | 0,002 | 96,647  | 0,156 | 0,002 | 83,080  | 0,154 | 0,002 | 68,615  | 0,154 | 0,002 | 101,942 | 0,153 | 0,001 | 215,460 |
| Tanzania Sandawe                | 0,027 | 0,027 | 0,024 | 0,020 | 0,022 | 0,017 | 0,146 | 0,002 | 61,781  | 0,146 | 0,002 | 61,893  | 0,146 | 0,003 | 53,978  | 0,144 | 0,003 | 45,601  | 0,144 | 0,002 | 63,316  | 0,143 | 0,001 | 178,316 |
| Kenya Turkana                   | 0,029 | 0,030 | 0,026 | 0,021 | 0,022 | 0,017 | 0,125 | 0,003 | 40,346  | 0,125 | 0,003 | 40,491  | 0,126 | 0,004 | 34,117  | 0,124 | 0,004 | 30,975  | 0,124 | 0,003 | 40,487  | 0,124 | 0,001 | 128,540 |
| South Africa ColouredColesberg  | 0,027 | 0,028 | 0,025 | 0,021 | 0,023 | 0,019 | 0,133 | 0,002 | 74,610  | 0,134 | 0,002 | 75,108  | 0,133 | 0,002 | 64,407  | 0,131 | 0,002 | 53,886  | 0,131 | 0,002 | 76,169  | 0,130 | 0,001 | 203,159 |
| Chad Fulani                     | 0,031 | 0,031 | 0,026 | 0,024 | 0,025 | 0,022 | 0,145 | 0,001 | 188,103 | 0,145 | 0,001 | 190,909 | 0,146 | 0,001 | 163,256 | 0,143 | 0,001 | 144,561 | 0,143 | 0,001 | 181,100 | 0,142 | 0,001 | 130,621 |
| Chad Daza                       | 0,032 | 0,034 | 0,029 | 0,025 | 0,026 | 0,021 | 0,140 | 0,001 | 181,966 | 0,140 | 0,001 | 184,557 | 0,140 | 0,001 | 147,009 | 0,138 | 0,001 | 136,567 | 0,139 | 0,001 | 168,610 | 0,138 | 0,001 | 130,483 |
| Kenya Samburu                   | 0,036 | 0,037 | 0,035 | 0,026 | 0,027 | 0,021 | 0,132 | 0,002 | 84,817  | 0,132 | 0,002 | 84,464  | 0,132 | 0,002 | 71,580  | 0,132 | 0,002 | 62,131  | 0,132 | 0,001 | 90,472  | 0,132 | 0,001 | 225,970 |
| Gabon Baka                      | 0,032 | 0,034 | 0,030 | 0,030 | 0,030 | 0,030 | 0,169 | 0,001 | 115,432 | 0,168 | 0,001 | 115,198 | 0,168 | 0,002 | 94,955  | 0,164 | 0,002 | 78,974  | 0,165 | 0,001 | 113,036 | 0,162 | 0,001 | 168,011 |
| Namibia Haihom                  | 0,035 | 0,034 | 0,034 | 0,031 | 0,031 | 0,029 | 0,159 | 0,004 | 40,512  | 0,160 | 0,004 | 40,910  | 0,159 | 0,004 | 35,763  | 0,156 | 0,005 | 30,560  | 0,157 | 0,004 | 41,269  | 0,155 | 0,001 | 115,887 |
| Cameroon Baka                   | 0,034 | 0,037 | 0,032 | 0,032 | 0,032 | 0,031 | 0,167 | 0,001 | 130,905 | 0,166 | 0,001 | 130,188 | 0,166 | 0,002 | 108,151 | 0,162 | 0,002 | 88,999  | 0,163 | 0,001 | 128,567 | 0,160 | 0,001 | 163,344 |
| Somalia Somali                  | 0,040 | 0,040 | 0,037 | 0,031 | 0,032 | 0,026 | 0,129 | 0,002 | 52,052  | 0,129 | 0,002 | 52,468  | 0,129 | 0,003 | 44,474  | 0,128 | 0,003 | 39,464  | 0,129 | 0,002 | 53,414  | 0,129 | 0,001 | 182,116 |
| Ethiopia Wolayta                | 0,040 | 0,041 | 0,038 | 0,032 | 0,033 | 0,026 | 0,127 | 0,002 | 69,102  | 0,127 | 0,002 | 69,150  | 0,127 | 0,002 | 59,820  | 0,127 | 0,002 | 50,952  | 0,127 | 0,002 | 71,744  | 0,128 | 0,001 | 185,534 |
| Ethiopia Oromo                  | 0,043 | 0,043 | 0,041 | 0,033 | 0,034 | 0,028 | 0,123 | 0,003 | 36,030  | 0,124 | 0,003 | 36,562  | 0,124 | 0,004 | 30,716  | 0,123 | 0,004 | 28,259  | 0,124 | 0,003 | 36,686  | 0,124 | 0,001 | 111,633 |
| Ethiopia Gumuz                  | 0,041 | 0,042 | 0,038 | 0,034 | 0,035 | 0,030 | 0,150 | 0,003 | 55,850  | 0,150 | 0,003 | 56,169  | 0,150 | 0,003 | 43,669  | 0,148 | 0,004 | 41,704  | 0,148 | 0,003 | 54,045  | 0,148 | 0,001 | 223,006 |
| South Africa ColouredWellington | 0,042 | 0,043 | 0,040 | 0,034 | 0,036 | 0,031 | 0,102 | 0,001 | 107,636 | 0,102 | 0,001 | 107,295 | 0,102 | 0,001 | 92,486  | 0,101 | 0,001 | 76,104  | 0,100 | 0,001 | 112,365 | 0,100 | 0,001 | 182,052 |
| Ethiopia Ari Cultivator         | 0,045 | 0,044 | 0,042 | 0,035 | 0,037 | 0,031 | 0,136 | 0,003 | 40,189  | 0,137 | 0,003 | 40,748  | 0,136 | 0,004 | 34,966  | 0,135 | 0,004 | 31,109  | 0,135 | 0,003 | 41,244  | 0,135 | 0,001 | 125,687 |
| Ethiopia Somali                 | 0,045 | 0,045 | 0,043 | 0,036 | 0,037 | 0,030 | 0,125 | 0,002 | 70,002  | 0,126 | 0,002 | 70,600  | 0,125 | 0,002 | 56,170  | 0,125 | 0,002 | 51,963  | 0,125 | 0,002 | 71,390  | 0,126 | 0,000 | 280,353 |
| CAR Biaka Pygmy                 | 0,040 | 0,043 | 0,037 | 0,037 | 0,038 | 0,037 | 0,167 | 0,001 | 200,486 | 0,166 | 0,001 | 186,783 | 0,167 | 0,001 | 250,515 | 0,163 | 0,001 | 150,433 | 0,164 | 0,001 | 281,763 | 0,161 | 0,001 | 148,771 |
| Namibia Nama                    | 0,043 | 0,043 | 0,041 | 0,038 | 0,039 | 0,036 | 0,150 | 0,003 | 49,247  | 0,151 | 0,003 | 49,545  | 0,150 | 0,003 | 43,494  | 0,148 | 0,004 | 36,798  | 0,148 | 0,003 | 50,157  | 0,146 | 0,001 | 147,929 |
| Uganda Batwa                    | 0,042 | 0,045 | 0,040 | 0,039 | 0,040 | 0,039 | 0,164 | 0,003 | 53,654  | 0,163 | 0,003 | 53,231  | 0,164 | 0,004 | 45,965  | 0,160 | 0,004 | 39,472  | 0,161 | 0,003 | 53,538  | 0,158 | 0,001 | 175,384 |
| Ethiopia Ethiopian Jews         | 0,049 | 0,050 | 0,047 | 0,040 | 0,040 | 0,034 | 0,119 | 0,001 | 145,671 | 0,119 | 0,001 | 140,678 | 0,119 | 0,001 | 127,280 | 0,118 | 0,001 | 101,512 | 0,119 | 0,001 | 176,140 | 0,120 | 0,001 | 183,709 |
| Sudan Arab                      | 0,050 | 0,052 | 0,049 | 0,042 | 0,043 | 0,037 | 0,116 | 0,001 | 169,534 | 0,116 | 0,001 | 164,059 | 0,116 | 0,000 | 258,970 | 0,116 | 0,001 | 191,649 | 0,116 | 0,001 | 196,091 | 0,117 | 0,001 | 106,671 |
| Ethiopia Amhara                 | 0,053 | 0,054 | 0,051 | 0,044 | 0,044 | 0,037 | 0,114 | 0,004 | 32,471  | 0,115 | 0,004 | 32,650  | 0,115 | 0,004 | 27,874  | 0,114 | 0,004 | 25,571  | 0,115 | 0,003 | 33,131  | 0,116 | 0,001 | 96,234  |
| Sudan Nubian                    | 0,053 | 0,054 | 0,050 | 0,044 | 0,045 | 0,037 | 0,115 | 0,001 | 78,973  | 0,116 | 0,001 | 79,194  | 0,116 | 0,002 | 67,780  | 0,115 | 0,002 | 58,022  | 0,115 | 0,001 | 83,133  | 0,116 | 0,001 | 221,854 |
| Ethiopia Tygray                 | 0,053 | 0,055 | 0,050 | 0,044 | 0,045 | 0,037 | 0,115 | 0,001 | 78,227  | 0,114 | 0,001 | 77,481  | 0,115 | 0,002 | 65,571  | 0,115 | 0,002 | 57,469  | 0,115 | 0,001 | 82,200  | 0,116 | 0,000 | 249,575 |



|                                     |       |       |       |       |       |       |       |       |         |       |       |         |       |       |         |       |       |         |       |       |         |       |       |         |
|-------------------------------------|-------|-------|-------|-------|-------|-------|-------|-------|---------|-------|-------|---------|-------|-------|---------|-------|-------|---------|-------|-------|---------|-------|-------|---------|
| India Brahmins from Uttar Pradesh   | 0,109 | 0,108 | 0,104 | 0,097 | 0,100 | 0,093 | 0,061 | 0,001 | 44,995  | 0,062 | 0,001 | 46,088  | 0,063 | 0,002 | 40,615  | 0,063 | 0,002 | 35,842  | 0,062 | 0,001 | 47,604  | 0,063 | 0,000 | 162,553 |
| Pakistan Pathan                     | 0,108 | 0,109 | 0,105 | 0,098 | 0,100 | 0,093 | 0,065 | 0,002 | 26,342  | 0,064 | 0,002 | 26,324  | 0,066 | 0,003 | 23,986  | 0,066 | 0,003 | 21,394  | 0,065 | 0,002 | 27,513  | 0,067 | 0,001 | 75,882  |
| Turkmenistan Turkmen                | 0,109 | 0,109 | 0,106 | 0,098 | 0,100 | 0,093 | 0,060 | 0,001 | 43,617  | 0,060 | 0,001 | 44,332  | 0,060 | 0,002 | 39,335  | 0,061 | 0,002 | 34,612  | 0,061 | 0,001 | 47,011  | 0,062 | 0,000 | 137,122 |
| Pakistan Sindhi                     | 0,108 | 0,110 | 0,105 | 0,098 | 0,100 | 0,093 | 0,065 | 0,001 | 97,949  | 0,065 | 0,001 | 97,926  | 0,066 | 0,001 | 83,556  | 0,067 | 0,001 | 72,959  | 0,066 | 0,001 | 101,810 | 0,067 | 0,000 | 152,609 |
| India Gujarat Brahmin               | 0,108 | 0,110 | 0,105 | 0,098 | 0,100 | 0,094 | 0,062 | 0,002 | 38,395  | 0,061 | 0,002 | 37,964  | 0,063 | 0,002 | 34,244  | 0,063 | 0,002 | 30,387  | 0,062 | 0,002 | 40,019  | 0,063 | 0,000 | 126,464 |
| India Indian                        | 0,109 | 0,110 | 0,105 | 0,098 | 0,101 | 0,094 | 0,059 | 0,001 | 96,866  | 0,059 | 0,001 | 95,988  | 0,061 | 0,001 | 81,357  | 0,060 | 0,001 | 71,556  | 0,060 | 0,001 | 105,307 | 0,061 | 0,000 | 222,996 |
| India Iyer                          | 0,109 | 0,110 | 0,106 | 0,098 | 0,101 | 0,094 | 0,060 | 0,000 | 167,985 | 0,061 | 0,000 | 141,760 | 0,061 | 0,000 | 372,826 | 0,062 | 0,000 | 177,534 | 0,061 | 0,000 | 494,744 | 0,062 | 0,001 | 113,082 |
| Pakistan Hazara                     | 0,110 | 0,110 | 0,106 | 0,099 | 0,101 | 0,094 | 0,037 | 0,000 | 157,814 | 0,038 | 0,000 | 161,292 | 0,039 | 0,000 | 133,632 | 0,039 | 0,000 | 170,453 | 0,038 | 0,000 | 134,787 | 0,040 | 0,000 | 89,712  |
| India Gujarati                      | 0,109 | 0,110 | 0,106 | 0,099 | 0,101 | 0,094 | 0,062 | 0,000 | 191,683 | 0,061 | 0,000 | 161,282 | 0,062 | 0,000 | 154,288 | 0,062 | 0,000 | 143,547 | 0,062 | 0,000 | 353,997 | 0,063 | 0,000 | 155,490 |
| India Punjabi                       | 0,110 | 0,110 | 0,107 | 0,099 | 0,101 | 0,094 | 0,061 | 0,002 | 34,898  | 0,061 | 0,002 | 35,204  | 0,062 | 0,002 | 30,845  | 0,063 | 0,002 | 28,124  | 0,062 | 0,002 | 36,434  | 0,063 | 0,001 | 114,583 |
| India Muslim                        | 0,110 | 0,111 | 0,105 | 0,099 | 0,101 | 0,095 | 0,058 | 0,001 | 78,458  | 0,058 | 0,001 | 75,224  | 0,060 | 0,001 | 104,542 | 0,059 | 0,001 | 80,571  | 0,058 | 0,001 | 92,724  | 0,059 | 0,001 | 74,521  |
| Lebanon Lebanese Muslim             | 0,109 | 0,111 | 0,107 | 0,099 | 0,101 | 0,092 | 0,078 | 0,002 | 33,059  | 0,077 | 0,002 | 32,895  | 0,078 | 0,003 | 28,953  | 0,079 | 0,003 | 26,430  | 0,079 | 0,002 | 34,390  | 0,081 | 0,001 | 105,810 |
| Pakistan Balochi                    | 0,110 | 0,112 | 0,107 | 0,099 | 0,101 | 0,094 | 0,068 | 0,000 | 153,523 | 0,068 | 0,000 | 151,201 | 0,069 | 0,000 | 143,978 | 0,070 | 0,001 | 116,147 | 0,069 | 0,000 | 174,885 | 0,071 | 0,001 | 136,276 |
| Iran Azeri                          | 0,111 | 0,112 | 0,106 | 0,099 | 0,101 | 0,093 | 0,070 | 0,001 | 137,428 | 0,070 | 0,001 | 132,446 | 0,071 | 0,001 | 125,841 | 0,072 | 0,001 | 101,925 | 0,071 | 0,000 | 172,312 | 0,073 | 0,000 | 168,261 |
| India Kol                           | 0,110 | 0,110 | 0,107 | 0,099 | 0,102 | 0,096 | 0,056 | 0,001 | 54,410  | 0,057 | 0,001 | 53,222  | 0,057 | 0,001 | 63,101  | 0,058 | 0,001 | 52,875  | 0,057 | 0,001 | 60,729  | 0,057 | 0,001 | 60,854  |
| Sri Lanka Sri Lankan                | 0,110 | 0,111 | 0,107 | 0,098 | 0,102 | 0,095 | 0,059 | 0,001 | 94,852  | 0,059 | 0,001 | 94,223  | 0,059 | 0,001 | 77,937  | 0,060 | 0,001 | 71,195  | 0,059 | 0,001 | 102,334 | 0,060 | 0,000 | 226,614 |
| India Palian                        | 0,110 | 0,111 | 0,107 | 0,100 | 0,102 | 0,097 | 0,057 | 0,001 | 61,878  | 0,057 | 0,001 | 62,139  | 0,058 | 0,001 | 53,217  | 0,058 | 0,001 | 47,244  | 0,057 | 0,001 | 65,010  | 0,057 | 0,000 | 226,438 |
| India Dusadh                        | 0,111 | 0,112 | 0,108 | 0,101 | 0,103 | 0,098 | 0,057 | 0,000 | 132,060 | 0,058 | 0,000 | 115,786 | 0,058 | 0,000 | 271,134 | 0,058 | 0,000 | 144,829 | 0,058 | 0,000 | 237,637 | 0,058 | 0,001 | 100,725 |
| India Chamar                        | 0,110 | 0,112 | 0,106 | 0,099 | 0,103 | 0,096 | 0,058 | 0,000 | 128,700 | 0,058 | 0,000 | 121,507 | 0,060 | 0,001 | 110,758 | 0,059 | 0,001 | 93,025  | 0,058 | 0,000 | 147,816 | 0,059 | 0,000 | 185,332 |
| Turkey Turks                        | 0,112 | 0,113 | 0,110 | 0,102 | 0,103 | 0,095 | 0,070 | 0,002 | 45,478  | 0,071 | 0,002 | 46,001  | 0,071 | 0,002 | 40,148  | 0,071 | 0,002 | 35,833  | 0,071 | 0,001 | 48,655  | 0,073 | 0,000 | 159,177 |
| Pakistan Brahui                     | 0,112 | 0,112 | 0,109 | 0,101 | 0,104 | 0,096 | 0,069 | 0,002 | 36,444  | 0,070 | 0,002 | 36,588  | 0,070 | 0,002 | 32,338  | 0,070 | 0,002 | 28,911  | 0,070 | 0,002 | 37,937  | 0,071 | 0,001 | 117,744 |
| India Uttar Pradesh Scheduled Caste | 0,111 | 0,113 | 0,110 | 0,101 | 0,104 | 0,097 | 0,058 | 0,000 | 128,798 | 0,058 | 0,000 | 121,658 | 0,058 | 0,001 | 103,541 | 0,059 | 0,001 | 91,927  | 0,058 | 0,000 | 146,686 | 0,059 | 0,000 | 186,263 |
| India Gond                          | 0,112 | 0,113 | 0,110 | 0,101 | 0,104 | 0,099 | 0,052 | 0,001 | 61,392  | 0,052 | 0,001 | 61,621  | 0,052 | 0,001 | 53,196  | 0,053 | 0,001 | 47,313  | 0,052 | 0,001 | 64,532  | 0,052 | 0,000 | 192,395 |
| Pakistan Burusho                    | 0,112 | 0,113 | 0,108 | 0,101 | 0,104 | 0,096 | 0,057 | 0,001 | 69,754  | 0,057 | 0,001 | 70,187  | 0,059 | 0,001 | 61,958  | 0,058 | 0,001 | 53,143  | 0,058 | 0,001 | 73,391  | 0,059 | 0,000 | 161,695 |
| India Dharkar                       | 0,112 | 0,114 | 0,109 | 0,101 | 0,104 | 0,098 | 0,060 | 0,001 | 64,396  | 0,060 | 0,001 | 64,080  | 0,061 | 0,001 | 45,927  | 0,061 | 0,001 | 49,589  | 0,060 | 0,001 | 61,741  | 0,061 | 0,000 | 392,325 |
| Pakistan Punjabi                    | 0,112 | 0,114 | 0,108 | 0,101 | 0,105 | 0,099 | 0,058 | 0,003 | 22,036  | 0,058 | 0,003 | 22,065  | 0,060 | 0,003 | 19,373  | 0,060 | 0,003 | 18,220  | 0,058 | 0,003 | 22,090  | 0,059 | 0,001 | 57,910  |
| Spain Spanish                       | 0,113 | 0,114 | 0,110 | 0,102 | 0,105 | 0,097 | 0,075 | 0,001 | 115,281 | 0,075 | 0,001 | 113,404 | 0,076 | 0,001 | 102,378 | 0,077 | 0,001 | 85,538  | 0,076 | 0,001 | 130,812 | 0,078 | 0,000 | 176,132 |
| Russia Azeri                        | 0,112 | 0,115 | 0,111 | 0,102 | 0,105 | 0,097 | 0,071 | 0,001 | 57,380  | 0,070 | 0,001 | 55,722  | 0,071 | 0,001 | 50,041  | 0,072 | 0,002 | 43,902  | 0,071 | 0,001 | 60,227  | 0,073 | 0,000 | 181,346 |
| Yemen Yemenite Jews                 | 0,114 | 0,115 | 0,111 | 0,103 | 0,105 | 0,096 | 0,082 | 0,002 | 46,395  | 0,082 | 0,002 | 46,524  | 0,083 | 0,002 | 41,277  | 0,084 | 0,002 | 36,459  | 0,083 | 0,002 | 49,492  | 0,086 | 0,001 | 158,105 |
| India Kanjars                       | 0,113 | 0,114 | 0,112 | 0,103 | 0,106 | 0,100 | 0,060 | 0,001 | 78,532  | 0,060 | 0,001 | 78,818  | 0,060 | 0,001 | 64,295  | 0,061 | 0,001 | 59,219  | 0,060 | 0,001 | 82,894  | 0,061 | 0,000 | 240,223 |



|                            |       |       |       |       |       |       |       |       |         |       |       |         |       |       |         |       |       |         |       |       |         |       |       |         |
|----------------------------|-------|-------|-------|-------|-------|-------|-------|-------|---------|-------|-------|---------|-------|-------|---------|-------|-------|---------|-------|-------|---------|-------|-------|---------|
| India Velama               | 0,115 | 0,115 | 0,110 | 0,103 | 0,106 | 0,099 | 0,059 | 0,001 | 47,299  | 0,060 | 0,001 | 47,489  | 0,061 | 0,001 | 46,843  | 0,061 | 0,001 | 45,797  | 0,060 | 0,001 | 47,863  | 0,061 | 0,001 | 53,634  |
| Armenia Armenian           | 0,115 | 0,116 | 0,112 | 0,104 | 0,106 | 0,098 | 0,075 | 0,002 | 41,607  | 0,075 | 0,002 | 41,762  | 0,075 | 0,002 | 36,651  | 0,076 | 0,002 | 33,082  | 0,076 | 0,002 | 44,222  | 0,078 | 0,001 | 145,106 |
| Italy Sicilian             | 0,115 | 0,117 | 0,113 | 0,104 | 0,106 | 0,098 | 0,077 | 0,004 | 19,963  | 0,077 | 0,004 | 19,955  | 0,078 | 0,004 | 18,212  | 0,079 | 0,005 | 16,472  | 0,078 | 0,004 | 21,105  | 0,080 | 0,002 | 52,873  |
| Lebanon Lebanese Christian | 0,116 | 0,117 | 0,112 | 0,104 | 0,106 | 0,099 | 0,077 | 0,003 | 30,018  | 0,077 | 0,003 | 30,070  | 0,079 | 0,003 | 27,045  | 0,079 | 0,003 | 24,607  | 0,079 | 0,002 | 31,908  | 0,081 | 0,001 | 92,985  |
| Irak Kurd Jew              | 0,116 | 0,117 | 0,113 | 0,105 | 0,107 | 0,099 | 0,075 | 0,004 | 17,292  | 0,075 | 0,004 | 17,503  | 0,076 | 0,005 | 15,245  | 0,077 | 0,005 | 14,484  | 0,077 | 0,004 | 17,827  | 0,079 | 0,002 | 43,611  |
| Lebanon Lebanese Druze     | 0,116 | 0,118 | 0,113 | 0,105 | 0,107 | 0,099 | 0,076 | 0,002 | 38,403  | 0,075 | 0,002 | 38,016  | 0,077 | 0,002 | 33,953  | 0,077 | 0,003 | 30,498  | 0,077 | 0,002 | 40,548  | 0,079 | 0,001 | 131,148 |
| India Piramalai Kallar     | 0,116 | 0,117 | 0,114 | 0,106 | 0,108 | 0,103 | 0,059 | 0,000 | 174,249 | 0,058 | 0,000 | 180,963 | 0,059 | 0,000 | 127,631 | 0,059 | 0,000 | 145,011 | 0,059 | 0,000 | 146,579 | 0,059 | 0,001 | 109,865 |
| Kazakhstan Kurd            | 0,118 | 0,119 | 0,116 | 0,107 | 0,108 | 0,100 | 0,073 | 0,002 | 35,818  | 0,074 | 0,002 | 36,137  | 0,074 | 0,002 | 31,397  | 0,075 | 0,003 | 28,896  | 0,075 | 0,002 | 38,234  | 0,077 | 0,001 | 122,428 |
| Cyprus Cypriot             | 0,118 | 0,119 | 0,114 | 0,105 | 0,108 | 0,099 | 0,076 | 0,004 | 20,612  | 0,076 | 0,004 | 20,647  | 0,077 | 0,004 | 18,857  | 0,079 | 0,005 | 17,235  | 0,078 | 0,004 | 21,923  | 0,080 | 0,001 | 55,867  |
| Georgia Balkar             | 0,117 | 0,117 | 0,113 | 0,106 | 0,109 | 0,100 | 0,067 | 0,002 | 27,292  | 0,067 | 0,002 | 27,695  | 0,068 | 0,003 | 24,540  | 0,068 | 0,003 | 22,307  | 0,067 | 0,002 | 28,321  | 0,069 | 0,001 | 81,084  |
| Israel Druze               | 0,117 | 0,119 | 0,115 | 0,107 | 0,109 | 0,101 | 0,078 | 0,003 | 26,444  | 0,078 | 0,003 | 26,322  | 0,079 | 0,003 | 24,003  | 0,079 | 0,004 | 21,453  | 0,079 | 0,003 | 27,902  | 0,081 | 0,001 | 75,389  |
| India Manipuri Brahmin     | 0,118 | 0,119 | 0,115 | 0,108 | 0,110 | 0,104 | 0,030 | 0,001 | 30,986  | 0,030 | 0,001 | 31,160  | 0,031 | 0,001 | 28,074  | 0,031 | 0,001 | 25,030  | 0,030 | 0,001 | 32,384  | 0,031 | 0,000 | 98,444  |
| Lybia Lybian Jew           | 0,119 | 0,119 | 0,116 | 0,108 | 0,110 | 0,102 | 0,082 | 0,001 | 72,174  | 0,082 | 0,001 | 73,019  | 0,082 | 0,001 | 62,196  | 0,083 | 0,002 | 54,887  | 0,082 | 0,001 | 77,420  | 0,084 | 0,000 | 220,832 |
| Iraq Iraqi Jews            | 0,119 | 0,120 | 0,116 | 0,108 | 0,110 | 0,101 | 0,075 | 0,001 | 133,489 | 0,075 | 0,001 | 133,430 | 0,076 | 0,001 | 142,599 | 0,077 | 0,000 | 154,574 | 0,076 | 0,001 | 128,847 | 0,079 | 0,001 | 89,161  |
| India Ho                   | 0,120 | 0,121 | 0,117 | 0,109 | 0,112 | 0,106 | 0,044 | 0,000 | 143,460 | 0,043 | 0,000 | 153,938 | 0,044 | 0,000 | 101,786 | 0,045 | 0,000 | 168,857 | 0,044 | 0,000 | 109,218 | 0,044 | 0,001 | 84,253  |
| India Tharu                | 0,120 | 0,121 | 0,118 | 0,110 | 0,112 | 0,107 | 0,029 | 0,001 | 23,546  | 0,030 | 0,001 | 23,790  | 0,030 | 0,001 | 21,565  | 0,030 | 0,002 | 19,311  | 0,030 | 0,001 | 25,276  | 0,030 | 0,000 | 64,930  |
| Romania Romanian           | 0,121 | 0,121 | 0,118 | 0,109 | 0,112 | 0,103 | 0,071 | 0,003 | 20,520  | 0,071 | 0,003 | 20,781  | 0,072 | 0,004 | 18,399  | 0,073 | 0,004 | 17,110  | 0,072 | 0,003 | 21,395  | 0,074 | 0,001 | 55,468  |
| Iran Iranian Jew           | 0,122 | 0,122 | 0,117 | 0,110 | 0,112 | 0,104 | 0,076 | 0,005 | 16,092  | 0,076 | 0,005 | 16,199  | 0,078 | 0,005 | 15,189  | 0,078 | 0,006 | 13,537  | 0,077 | 0,005 | 17,167  | 0,080 | 0,002 | 40,787  |
| Georgia Chechen            | 0,121 | 0,122 | 0,117 | 0,110 | 0,112 | 0,103 | 0,069 | 0,002 | 31,723  | 0,068 | 0,002 | 31,441  | 0,070 | 0,002 | 28,824  | 0,070 | 0,003 | 25,594  | 0,070 | 0,002 | 33,755  | 0,072 | 0,001 | 100,048 |
| Georgia Georgian           | 0,122 | 0,122 | 0,118 | 0,110 | 0,112 | 0,105 | 0,072 | 0,001 | 48,780  | 0,073 | 0,001 | 49,498  | 0,074 | 0,002 | 41,801  | 0,074 | 0,002 | 38,851  | 0,074 | 0,001 | 51,360  | 0,076 | 0,000 | 199,510 |
| India North Kannadi        | 0,120 | 0,121 | 0,117 | 0,110 | 0,113 | 0,104 | 0,055 | 0,002 | 22,717  | 0,055 | 0,002 | 22,455  | 0,056 | 0,002 | 23,300  | 0,056 | 0,003 | 20,398  | 0,055 | 0,002 | 24,280  | 0,057 | 0,002 | 34,309  |
| Italy Italian Abruzzo      | 0,122 | 0,121 | 0,118 | 0,110 | 0,113 | 0,104 | 0,073 | 0,002 | 34,615  | 0,074 | 0,002 | 35,336  | 0,074 | 0,002 | 31,719  | 0,075 | 0,003 | 28,159  | 0,074 | 0,002 | 36,709  | 0,077 | 0,001 | 110,159 |
| Georgia Abkhasian          | 0,122 | 0,122 | 0,118 | 0,110 | 0,113 | 0,104 | 0,070 | 0,002 | 30,589  | 0,071 | 0,002 | 30,988  | 0,071 | 0,003 | 26,972  | 0,072 | 0,003 | 24,932  | 0,071 | 0,002 | 31,803  | 0,074 | 0,001 | 97,264  |
| Italy Tuscan               | 0,122 | 0,123 | 0,119 | 0,110 | 0,113 | 0,104 | 0,074 | 0,002 | 37,159  | 0,074 | 0,002 | 37,361  | 0,075 | 0,002 | 31,447  | 0,076 | 0,003 | 29,925  | 0,075 | 0,002 | 38,243  | 0,078 | 0,001 | 130,997 |
| Georgia Georgians          | 0,123 | 0,123 | 0,119 | 0,111 | 0,113 | 0,105 | 0,070 | 0,001 | 56,248  | 0,071 | 0,001 | 57,257  | 0,072 | 0,001 | 50,073  | 0,073 | 0,002 | 44,486  | 0,072 | 0,001 | 61,097  | 0,074 | 0,000 | 202,947 |
| India Santal               | 0,121 | 0,123 | 0,121 | 0,112 | 0,114 | 0,109 | 0,046 | 0,001 | 82,879  | 0,046 | 0,001 | 81,678  | 0,045 | 0,001 | 68,775  | 0,047 | 0,001 | 61,172  | 0,046 | 0,001 | 86,905  | 0,046 | 0,000 | 167,561 |
| Croatia Croatian           | 0,124 | 0,123 | 0,120 | 0,112 | 0,114 | 0,106 | 0,072 | 0,001 | 69,039  | 0,073 | 0,001 | 70,880  | 0,073 | 0,001 | 60,956  | 0,074 | 0,001 | 53,394  | 0,073 | 0,001 | 74,904  | 0,075 | 0,000 | 209,972 |
| France French              | 0,125 | 0,125 | 0,121 | 0,113 | 0,116 | 0,107 | 0,071 | 0,003 | 22,014  | 0,072 | 0,003 | 22,127  | 0,073 | 0,004 | 20,220  | 0,073 | 0,004 | 18,257  | 0,072 | 0,003 | 23,242  | 0,075 | 0,001 | 61,010  |
| Italy Italian Bergamo      | 0,125 | 0,125 | 0,122 | 0,113 | 0,116 | 0,108 | 0,072 | 0,004 | 19,392  | 0,073 | 0,004 | 19,533  | 0,073 | 0,004 | 17,839  | 0,074 | 0,005 | 16,109  | 0,073 | 0,004 | 20,421  | 0,076 | 0,001 | 51,413  |
| Hungary Hungarian          | 0,126 | 0,126 | 0,122 | 0,114 | 0,116 | 0,107 | 0,070 | 0,002 | 46,514  | 0,071 | 0,002 | 47,120  | 0,072 | 0,002 | 41,788  | 0,072 | 0,002 | 37,143  | 0,072 | 0,001 | 49,807  | 0,074 | 0,000 | 168,780 |
| Burma Burmese              | 0,125 | 0,126 | 0,124 | 0,116 | 0,117 | 0,113 | 0,017 | 0,002 | 9,162   | 0,017 | 0,002 | 9,177   | 0,017 | 0,002 | 8,332   | 0,018 | 0,002 | 7,607   | 0,018 | 0,002 | 9,655   | 0,018 | 0,001 | 21,004  |

|                         |       |       |       |       |       |       |       |       |         |       |       |         |       |       |         |       |       |         |       |       |         |       |       |         |
|-------------------------|-------|-------|-------|-------|-------|-------|-------|-------|---------|-------|-------|---------|-------|-------|---------|-------|-------|---------|-------|-------|---------|-------|-------|---------|
| USA CEU                 | 0,127 | 0,128 | 0,122 | 0,115 | 0,117 | 0,108 | 0,071 | 0,002 | 38,467  | 0,071 | 0,002 | 38,444  | 0,072 | 0,002 | 35,348  | 0,073 | 0,002 | 31,111  | 0,072 | 0,002 | 41,262  | 0,075 | 0,001 | 129,119 |
| India Kadar             | 0,127 | 0,127 | 0,124 | 0,117 | 0,118 | 0,114 | 0,054 | 0,003 | 20,551  | 0,054 | 0,003 | 20,616  | 0,054 | 0,003 | 19,875  | 0,055 | 0,003 | 18,436  | 0,055 | 0,003 | 21,314  | 0,055 | 0,002 | 30,407  |
| Georgia Abkhasian       | 0,126 | 0,127 | 0,123 | 0,116 | 0,118 | 0,109 | 0,068 | 0,001 | 115,431 | 0,068 | 0,001 | 110,657 | 0,069 | 0,000 | 175,066 | 0,069 | 0,001 | 128,845 | 0,069 | 0,001 | 135,570 | 0,071 | 0,001 | 87,565  |
| India Korva             | 0,130 | 0,130 | 0,128 | 0,120 | 0,122 | 0,117 | 0,046 | 0,000 | 101,539 | 0,046 | 0,000 | 101,277 | 0,046 | 0,001 | 87,606  | 0,047 | 0,001 | 74,253  | 0,046 | 0,000 | 112,377 | 0,047 | 0,000 | 175,381 |
| India Tripuri           | 0,130 | 0,131 | 0,128 | 0,120 | 0,122 | 0,117 | 0,017 | 0,000 | 54,349  | 0,017 | 0,000 | 54,068  | 0,017 | 0,000 | 44,808  | 0,017 | 0,000 | 41,508  | 0,017 | 0,000 | 58,581  | 0,017 | 0,000 | 179,734 |
| India Birhor            | 0,129 | 0,131 | 0,128 | 0,119 | 0,122 | 0,116 | 0,049 | 0,000 | 138,925 | 0,049 | 0,000 | 135,236 | 0,049 | 0,000 | 201,405 | 0,050 | 0,000 | 160,699 | 0,049 | 0,000 | 154,599 | 0,049 | 0,001 | 91,244  |
| Italy Sardinian         | 0,134 | 0,134 | 0,130 | 0,121 | 0,123 | 0,115 | 0,075 | 0,002 | 34,048  | 0,075 | 0,002 | 34,276  | 0,076 | 0,002 | 31,300  | 0,077 | 0,003 | 27,946  | 0,077 | 0,002 | 37,090  | 0,079 | 0,001 | 111,168 |
| India Irula             | 0,133 | 0,133 | 0,131 | 0,123 | 0,125 | 0,120 | 0,055 | 0,002 | 34,721  | 0,055 | 0,002 | 34,517  | 0,055 | 0,002 | 35,413  | 0,055 | 0,002 | 32,149  | 0,055 | 0,002 | 36,514  | 0,055 | 0,001 | 44,808  |
| India Jamatia           | 0,134 | 0,134 | 0,132 | 0,124 | 0,126 | 0,120 | 0,016 | 0,001 | 31,532  | 0,017 | 0,000 | 33,613  | 0,016 | 0,001 | 28,128  | 0,017 | 0,001 | 25,659  | 0,016 | 0,000 | 34,127  | 0,017 | 0,000 | 93,875  |
| Greece Greek            | 0,134 | 0,135 | 0,131 | 0,124 | 0,126 | 0,122 | 0,080 | 0,003 | 29,422  | 0,080 | 0,003 | 29,309  | 0,081 | 0,003 | 26,345  | 0,081 | 0,003 | 23,712  | 0,081 | 0,003 | 30,556  | 0,081 | 0,001 | 84,756  |
| Indonesia Samihin       | 0,134 | 0,135 | 0,132 | 0,125 | 0,127 | 0,122 | 0,020 | 0,001 | 14,792  | 0,019 | 0,001 | 14,345  | 0,020 | 0,001 | 13,590  | 0,020 | 0,002 | 11,961  | 0,020 | 0,001 | 15,327  | 0,019 | 0,001 | 35,514  |
| Singapore Malay         | 0,134 | 0,135 | 0,132 | 0,125 | 0,127 | 0,122 | 0,016 | 0,001 | 24,391  | 0,016 | 0,001 | 24,085  | 0,016 | 0,001 | 21,597  | 0,016 | 0,001 | 18,800  | 0,015 | 0,001 | 24,941  | 0,015 | 0,000 | 63,083  |
| Cambodia Cambodian      | 0,136 | 0,137 | 0,133 | 0,126 | 0,127 | 0,124 | 0,013 | 0,001 | 14,219  | 0,013 | 0,001 | 13,994  | 0,014 | 0,001 | 13,635  | 0,014 | 0,001 | 11,979  | 0,014 | 0,001 | 15,869  | 0,013 | 0,000 | 36,049  |
| Indonesia Bajo          | 0,138 | 0,139 | 0,136 | 0,129 | 0,130 | 0,126 | 0,018 | 0,004 | 4,322   | 0,018 | 0,004 | 4,321   | 0,018 | 0,004 | 4,082   | 0,018 | 0,005 | 3,607   | 0,018 | 0,004 | 4,533   | 0,018 | 0,002 | 8,794   |
| Pakistan Kalash         | 0,139 | 0,141 | 0,136 | 0,128 | 0,131 | 0,123 | 0,064 | 0,002 | 32,634  | 0,064 | 0,002 | 32,330  | 0,065 | 0,002 | 29,674  | 0,066 | 0,002 | 26,529  | 0,065 | 0,002 | 34,529  | 0,067 | 0,001 | 103,865 |
| Indonesia Bugis         | 0,141 | 0,142 | 0,139 | 0,132 | 0,133 | 0,129 | 0,012 | 0,001 | 9,288   | 0,013 | 0,001 | 9,582   | 0,013 | 0,001 | 8,951   | 0,013 | 0,002 | 7,961   | 0,013 | 0,001 | 10,211  | 0,012 | 0,001 | 21,834  |
| Indonesia Dayak Ngaju   | 0,142 | 0,143 | 0,141 | 0,133 | 0,135 | 0,131 | 0,013 | 0,000 | 69,548  | 0,013 | 0,000 | 78,057  | 0,012 | 0,000 | 36,746  | 0,013 | 0,000 | 84,075  | 0,013 | 0,000 | 44,626  | 0,012 | 0,000 | 45,200  |
| Indonesia Banjar        | 0,143 | 0,143 | 0,141 | 0,134 | 0,135 | 0,131 | 0,011 | 0,002 | 5,136   | 0,011 | 0,002 | 5,258   | 0,011 | 0,002 | 4,907   | 0,011 | 0,003 | 4,331   | 0,011 | 0,002 | 5,560   | 0,011 | 0,001 | 11,011  |
| Vietnam Kinh            | 0,143 | 0,143 | 0,142 | 0,134 | 0,135 | 0,131 | 0,005 | 0,000 | 62,923  | 0,005 | 0,000 | 96,046  | 0,005 | 0,000 | 17,100  | 0,005 | 0,000 | 61,962  | 0,005 | 0,000 | 25,852  | 0,005 | 0,000 | 30,294  |
| India Paniya            | 0,143 | 0,143 | 0,140 | 0,133 | 0,135 | 0,131 | 0,052 | 0,001 | 56,985  | 0,052 | 0,001 | 57,930  | 0,053 | 0,001 | 50,806  | 0,053 | 0,001 | 56,959  | 0,052 | 0,001 | 53,307  | 0,052 | 0,001 | 56,791  |
| Indonesia Bajo Derawan  | 0,143 | 0,144 | 0,140 | 0,134 | 0,135 | 0,130 | 0,013 | 0,002 | 8,242   | 0,014 | 0,002 | 8,454   | 0,014 | 0,002 | 8,167   | 0,014 | 0,002 | 6,991   | 0,014 | 0,002 | 9,075   | 0,014 | 0,001 | 20,033  |
| Vietnam Vietnamese      | 0,145 | 0,146 | 0,143 | 0,135 | 0,137 | 0,133 | 0,004 | 0,001 | 4,403   | 0,004 | 0,001 | 4,643   | 0,004 | 0,001 | 4,588   | 0,005 | 0,001 | 4,094   | 0,004 | 0,001 | 5,179   | 0,004 | 0,000 | 9,883   |
| Indonesia Dayak         | 0,146 | 0,147 | 0,144 | 0,137 | 0,138 | 0,134 | 0,010 | 0,001 | 12,953  | 0,010 | 0,001 | 12,584  | 0,010 | 0,001 | 11,608  | 0,010 | 0,001 | 10,149  | 0,010 | 0,001 | 14,038  | 0,010 | 0,000 | 31,561  |
| China Han               | 0,147 | 0,148 | 0,145 | 0,138 | 0,140 | 0,135 | -     | -     | -       | -     | -     | -       | -     | -     | -       | -     | -     | -       | -     | -     | -       | -     | -     | -       |
| Indonesia Maanyan       | 0,148 | 0,149 | 0,147 | 0,140 | 0,141 | 0,136 | 0,012 | 0,001 | 8,640   | 0,012 | 0,001 | 8,717   | 0,011 | 0,001 | 7,912   | 0,011 | 0,002 | 6,780   | 0,012 | 0,001 | 9,039   | 0,012 | 0,001 | 20,031  |
| China Dai               | 0,148 | 0,149 | 0,147 | 0,140 | 0,141 | 0,136 | 0,004 | 0,001 | 3,406   | 0,004 | 0,001 | 3,523   | 0,004 | 0,001 | 3,266   | 0,004 | 0,001 | 2,905   | 0,004 | 0,001 | 4,009   | 0,003 | 0,000 | 7,415   |
| Morocco Moroccan        | 0,150 | 0,151 | 0,146 | 0,142 | 0,143 | 0,139 | 0,093 | 0,001 | 109,857 | 0,093 | 0,001 | 110,169 | 0,094 | 0,001 | 94,534  | 0,093 | 0,001 | 79,302  | 0,093 | 0,001 | 114,045 | 0,093 | 0,001 | 162,961 |
| Brunei Dusun            | 0,153 | 0,154 | 0,151 | 0,144 | 0,145 | 0,141 | 0,008 | 0,001 | 7,711   | 0,009 | 0,001 | 7,971   | 0,008 | 0,001 | 7,331   | 0,009 | 0,001 | 6,615   | 0,009 | 0,001 | 8,672   | 0,008 | 0,000 | 18,449  |
| Indonesia Bajo Kotabaru | 0,154 | 0,154 | 0,152 | 0,144 | 0,145 | 0,142 | 0,014 | 0,003 | 4,632   | 0,015 | 0,003 | 4,860   | 0,015 | 0,003 | 4,474   | 0,015 | 0,004 | 4,029   | 0,015 | 0,003 | 5,137   | 0,014 | 0,001 | 9,882   |
| Brunei Murut            | 0,156 | 0,157 | 0,155 | 0,148 | 0,149 | 0,144 | 0,009 | 0,000 | 29,819  | 0,009 | 0,000 | 32,799  | 0,008 | 0,001 | 15,059  | 0,009 | 0,000 | 30,442  | 0,009 | 0,000 | 19,598  | 0,009 | 0,000 | 25,319  |
| India Pulliyar          | 0,154 | 0,159 | 0,154 | 0,147 | 0,149 | 0,142 | 0,055 | 0,004 | 14,753  | 0,052 | 0,004 | 14,270  | 0,054 | 0,004 | 13,772  | 0,054 | 0,004 | 12,695  | 0,053 | 0,004 | 14,862  | 0,055 | 0,002 | 23,100  |

|                         |       |       |       |       |       |       |       |       |        |       |       |        |       |       |        |       |       |        |       |       |        |       |       |         |
|-------------------------|-------|-------|-------|-------|-------|-------|-------|-------|--------|-------|-------|--------|-------|-------|--------|-------|-------|--------|-------|-------|--------|-------|-------|---------|
| Bulgaria Bulgarian      | 0,157 | 0,159 | 0,154 | 0,149 | 0,151 | 0,146 | 0,080 | 0,001 | 83,486 | 0,080 | 0,001 | 83,174 | 0,081 | 0,001 | 73,107 | 0,081 | 0,001 | 62,024 | 0,080 | 0,001 | 87,322 | 0,081 | 0,000 | 175,962 |
| Indonesia Lebbo         | 0,163 | 0,165 | 0,161 | 0,154 | 0,155 | 0,151 | 0,011 | 0,002 | 4,825  | 0,010 | 0,002 | 4,526  | 0,011 | 0,002 | 4,468  | 0,011 | 0,003 | 3,857  | 0,011 | 0,002 | 5,199  | 0,011 | 0,001 | 9,858   |
| Philippines Igorot      | 0,178 | 0,178 | 0,175 | 0,168 | 0,170 | 0,166 | 0,002 | 0,001 | 2,263  | 0,003 | 0,001 | 2,599  | 0,003 | 0,001 | 2,466  | 0,003 | 0,001 | 2,071  | 0,002 | 0,001 | 2,366  | 0,002 | 0,000 | 4,920   |
| India Jarawa            | 0,197 | 0,200 | 0,197 | 0,189 | 0,192 | 0,186 | 0,046 | 0,005 | 9,004  | 0,045 | 0,005 | 8,658  | 0,045 | 0,006 | 8,121  | 0,046 | 0,006 | 7,375  | 0,045 | 0,005 | 9,051  | 0,046 | 0,002 | 19,106  |
| India Onge              | 0,204 | 0,207 | 0,205 | 0,196 | 0,199 | 0,192 | 0,045 | 0,006 | 7,861  | 0,043 | 0,006 | 7,483  | 0,043 | 0,006 | 6,937  | 0,045 | 0,007 | 6,418  | 0,043 | 0,006 | 7,831  | 0,045 | 0,003 | 16,594  |
| Papua New Guinea Papuan | 0,227 | 0,228 | 0,224 | 0,217 | 0,219 | 0,215 | 0,056 | 0,002 | 22,500 | 0,056 | 0,002 | 22,572 | 0,057 | 0,003 | 21,097 | 0,057 | 0,003 | 18,341 | 0,056 | 0,002 | 23,852 | 0,056 | 0,001 | 58,641  |
| UAE Arab                | 0,292 | 0,292 | 0,290 | 0,284 | 0,287 | 0,285 | 0,085 | 0,002 | 47,693 | 0,086 | 0,002 | 48,271 | 0,086 | 0,002 | 41,494 | 0,086 | 0,002 | 36,908 | 0,085 | 0,002 | 48,856 | 0,083 | 0,001 | 157,702 |
| Tunisia Tunisian        | 0,292 | 0,294 | 0,290 | 0,285 | 0,287 | 0,285 | 0,089 | 0,002 | 37,607 | 0,089 | 0,002 | 37,082 | 0,091 | 0,003 | 34,253 | 0,090 | 0,003 | 29,337 | 0,089 | 0,002 | 39,025 | 0,088 | 0,001 | 108,178 |
| Italy West Sicilian     | 0,298 | 0,299 | 0,295 | 0,291 | 0,293 | 0,290 | 0,086 | 0,002 | 42,176 | 0,086 | 0,002 | 41,742 | 0,087 | 0,002 | 38,194 | 0,086 | 0,003 | 32,470 | 0,086 | 0,002 | 43,608 | 0,085 | 0,001 | 119,719 |
| Italy East Sicilian     | 0,298 | 0,299 | 0,295 | 0,292 | 0,293 | 0,291 | 0,088 | 0,002 | 56,937 | 0,087 | 0,002 | 56,368 | 0,090 | 0,002 | 50,487 | 0,087 | 0,002 | 42,540 | 0,087 | 0,001 | 58,283 | 0,086 | 0,000 | 184,963 |
| Italy South Italian     | 0,298 | 0,300 | 0,295 | 0,292 | 0,293 | 0,291 | 0,088 | 0,003 | 29,734 | 0,088 | 0,003 | 29,560 | 0,090 | 0,003 | 26,797 | 0,089 | 0,004 | 23,588 | 0,088 | 0,003 | 30,295 | 0,087 | 0,001 | 81,032  |

Table S10.  $F_{ST}$  and  $f_3$ -statistics (African-SNP: Comoros-Anjouan, X; China-Han) results for Comoros and Swahili populations compared to other populations in the 170K dataset using African-SNPs identified by PCAdmix<sup>11</sup>.

| A-Comoros and Malagasy in the same cluster           |      |          |       |                    |      |      |       |             |               |                  |                           |               |                           |                           |      |        |              |                 |                           |                           |        |              |                 |                           |                           |
|------------------------------------------------------|------|----------|-------|--------------------|------|------|-------|-------------|---------------|------------------|---------------------------|---------------|---------------------------|---------------------------|------|--------|--------------|-----------------|---------------------------|---------------------------|--------|--------------|-----------------|---------------------------|---------------------------|
| Population                                           | Null | Best-fit | p     | R <sup>2</sup> .1D | FQ1  | FQ2  | G.1D  | G.1D        | % 1D Source 1 | 1D Source 1      | 1D Source 2               | % MW Source 1 | MW Source 1               | MW Source 2               | M    | G.2D.1 | G.2D.1 95%CI | % 2D.1 Source 1 | 2D.1 Source 1             | 2D.1 Source 2             | G.2D.2 | G.2D.2       | % 2D.2 Source 1 | 2D.2 Source 1             | 2D.2 Source 2             |
| Comoros Anjouan                                      | 0    | 2D       | <0.01 | 0.99               | 0.98 | 1.00 | 28.50 | -           | 0.21          | Indonesia Banjar | Kenya Swahili Mombasa     | 0.46          | Kenya Swahili Lamu        | Kenya Swahili Lamu        | 0.47 | 15.82  | 1.2-23.2     | 0.26            | Dubai Arab                | Kenya Swahili Mombasa     | 41.27  | 31.4-60.1    | 0.17            | Indonesia Banjar          | Kenya Swahili Mombasa     |
| Comoros Anjouan                                      | 1    | 1D       | <0.01 | 0.99               | 0.99 | 1.00 | 29.00 | 25.7-31.4   | 0.22          | Indonesia Banjar | Kenya Swahili Mombasa     | 0.47          | Kenya Swahili Lamu        | Kenya Swahili Lamu        | 0.34 | 13.68  | -            | 0.26            | Kenya Swahili Kilifi      | Kenya Swahili Mombasa     | 38.92  | -            | 0.19            | Singapore Malay           | Kenya Swahili Mombasa     |
| ComorosGrande Comore                                 | 0    | 1D       | <0.01 | 0.99               | 1.00 | 1.00 | 27.33 | 26.5-29.3   | 0.17          | Indonesia Banjar | Kenya Swahili Mombasa     | 0.37          | Dubai Arab                | South Africa Bantu Soweto | 0.29 | 1.00   | -            | 0.38            | Kenya Swahili Lamu        | Kenya Swahili Mombasa     | 30.31  | -            | 0.17            | Indonesia Banjar          | Kenya Swahili Mombasa     |
| ComorosGrande Comore                                 | 1    | 1D       | <0.01 | 0.99               | 1.00 | 1.00 | 29.10 | 26.2-31.1   | 0.19          | Indonesia Banjar | Kenya Swahili Mombasa     | 0.39          | Kenya Swahili Lamu        | South Africa Bantu Soweto | 0.25 | 1.00   | -            | 0.46            | Kenya Swahili Lamu        | Kenya Swahili Mombasa     | 31.54  | -            | 0.19            | Indonesia Banjar          | Kenya Swahili Mombasa     |
| Comoros Moheli                                       | 0    | 2D       | <0.01 | 0.98               | 0.98 | 1.00 | 25.05 | -           | 0.20          | Singapore Malay  | Kenya Swahili Mombasa     | 0.45          | Kenya Swahili Lamu        | Kenya Swahili Lamu        | 0.65 | 5.08   | 1.4-8.9      | 0.15            | Indonesia Banjar          | Kenya Swahili Mombasa     | 35.72  | 30.9-42.8    | 0.20            | Singapore Malay           | Kenya Swahili Mombasa     |
| Comoros Moheli                                       | 1    | 2D       | <0.01 | 0.98               | 0.98 | 1.00 | 25.53 | -           | 0.21          | Singapore Malay  | Kenya Swahili Mombasa     | 0.47          | Kenya Swahili Lamu        | Kenya Swahili Lamu        | 0.63 | 5.57   | 1.3-11.9     | 0.20            | South Africa Bantu Soweto | Kenya Swahili Mombasa     | 38.37  | 32.4-43.8    | 0.22            | Singapore Malay           | Kenya Swahili Mombasa     |
| Madagascar Antemoro                                  | 0    | 1D       | <0.01 | 1.00               | 1.00 | 1.00 | 30.21 | 28.8-31.8   | 0.35          | Indonesia Banjar | Kenya Swahili Mombasa     | 0.31          | Kenya Luhya               | South Africa Bantu Soweto | 0.22 | 5.87   | -            | 0.35            | Kenya Swahili Lamu        | South Africa Bantu Soweto | 31.00  | -            | 0.35            | Indonesia Banjar          | Kenya Swahili Mombasa     |
| Madagascar Antemoro                                  | 1    | 1D       | <0.01 | 0.99               | 1.00 | 1.00 | 30.87 | 29.2-33.3   | 0.35          | Indonesia Banjar | Kenya Swahili Mombasa     | 0.36          | Cameroon Nzime            | South Africa Bantu Soweto | 0.21 | 28.99  | -            | 0.34            | Indonesia Banjar          | Kenya Swahili Mombasa     | 119.66 | -            | 0.15            | Indonesia Bugis           | Kenya Swahili Mombasa     |
| Madagascar Mikea                                     | 0    | 1D       | <0.01 | 0.99               | 1.00 | 1.00 | 27.58 | 25.9-29.6   | 0.33          | Indonesia Banjar | Kenya Swahili Mombasa     | 0.33          | Namibia Kwangali          | South Africa Bantu Soweto | 0.31 | 13.62  | -            | 0.48            | Indonesia Banjar          | Kenya Swahili Mombasa     | 40.84  | -            | 0.32            | Indonesia Banjar          | Kenya Swahili Mombasa     |
| Madagascar Mikea                                     | 1    | 2D       | <0.01 | 0.99               | 1.00 | 1.00 | 27.75 | 26.1-30.6   | 0.33          | Indonesia Banjar | Kenya Swahili Mombasa     | 0.34          | Gabon Nzebi               | Kenya Swahili Lamu        | 0.41 | 7.25   | -            | 0.40            | Kenya Swahili Mombasa     | Kenya Swahili Lamu        | 35.60  | -            | 0.33            | Indonesia Banjar          | Kenya Swahili Mombasa     |
| Madagascar Vezo                                      | 0    | 1D       | <0.01 | 0.99               | 1.00 | 1.00 | 25.69 | 24.1-26.9   | 0.37          | Singapore Malay  | Kenya Swahili Mombasa     | 0.31          | Uganda Bakiga             | Kenya Swahili Lamu        | 0.17 | 22.34  | -            | 0.35            | Indonesia Banjar          | Kenya Swahili Mombasa     | 89.37  | -            | 0.45            | Indonesia Banjar          | Kenya Swahili Mombasa     |
| Madagascar Vezo                                      | 1    | 2D       | <0.01 | 0.99               | 1.00 | 1.00 | 25.97 | 23.7-27.1   | 0.37          | Singapore Malay  | Kenya Swahili Mombasa     | 0.32          | Uganda Bakiga             | Kenya Swahili Lamu        | 0.37 | 22.08  | -            | 0.37            | Indonesia Banjar          | Kenya Swahili Mombasa     | 79.18  | -            | 0.46            | Indonesia Banjar          | Kenya Swahili Mombasa     |
| B-Comoros and Malagasy in different clusters         |      |          |       |                    |      |      |       |             |               |                  |                           |               |                           |                           |      |        |              |                 |                           |                           |        |              |                 |                           |                           |
| Population                                           | Null | Best-fit | p     | R <sup>2</sup> .1D | FQ1  | FQ2  | G.1D  | G.1D        | % 1D Source 1 | 1D Source 1      | 1D Source 2               | % MW Source 1 | MW Source 1               | MW Source 2               | M    | G.2D.1 | G.2D.1 95%CI | % 2D.1 Source 1 | 2D.1 Source 1             | 2D.1 Source 2             | G.2D.2 | G.2D.2       | % 2D.2 Source 1 | 2D.2 Source 1             | 2D.2 Source 2             |
| Comoros Anjouan                                      | 0    | 2D       | <0.01 | 0.98               | 0.99 | 1.00 | 28.48 | -           | 0.19          | USA CEU          | Kenya Swahili Mombasa     | 0.37          | Madagascar Antemoro       | Kenya Swahili Mombasa     | 0.51 | 12.00  | 1.32-19.87   | 0.19            | Dubai Arab                | Kenya Swahili Mombasa     | 49.26  | 32.10-67.49  | 0.20            | India Brahmin             | Kenya Swahili Mombasa     |
| Comoros Anjouan                                      | 1    | 2D       | <0.01 | 0.99               | 0.99 | 1.00 | 28.33 | -           | 0.20          | USA CEU          | Kenya Swahili Mombasa     | 0.36          | Madagascar Antemoro       | Kenya Swahili Mombasa     | 0.40 | 12.74  | 1.82-21.61   | 0.19            | Dubai Arab                | Kenya Swahili Mombasa     | 48.75  | 32.16-86.16  | 0.19            | India Brahmin             | Kenya Swahili Mombasa     |
| ComorosGrande Comore                                 | 0    | MW       | <0.01 | 0.99               | 0.97 | 1.00 | 28.36 | 25.84-29.33 | 0.19          | India Punjabi    | Kenya Swahili Mombasa     | 0.42          | Madagascar Antemoro       | Kenya Swahili Mombasa     | 0.32 | 19.01  | -            | 0.15            | India Brahmin             | Kenya Swahili Mombasa     | 52.99  | -            | 0.24            | Madagascar Vezo           | Kenya Swahili Mombasa     |
| ComorosGrande Comore                                 | 1    | 1D       | <0.01 | 0.99               | 0.99 | 1.00 | 30.74 | 26.23-31.12 | 0.19          | India Punjabi    | Kenya Swahili Mombasa     | 0.41          | Madagascar Antemoro       | Kenya Swahili Mombasa     | 0.34 | 11.42  | -            | 0.16            | India Punjabi             | Kenya Swahili Mombasa     | 42.44  | -            | 0.18            | Bangladesh Bengali        | Kenya Swahili Mombasa     |
| Comoros Moheli                                       | 0    | 2D       | <0.01 | 0.98               | 0.98 | 1.00 | 26.57 | -           | 0.19          | India Punjabi    | Kenya Swahili Mombasa     | 0.42          | Madagascar Antemoro       | Kenya Swahili Mombasa     | 0.55 | 3.11   | 1.17-11.01   | 0.26            | Madagascar Antemoro       | Kenya Swahili Mombasa     | 34.95  | 30.87-42.84  | 0.19            | India Punjabi             | Kenya Swahili Mombasa     |
| Comoros Moheli                                       | 1    | 2D       | <0.01 | 0.97               | 0.99 | 1.00 | 28.57 | -           | 0.19          | India Punjabi    | Kenya Swahili Mombasa     | 0.42          | Madagascar Antemoro       | Kenya Swahili Mombasa     | 0.58 | 4.70   | 1.36-11.38   | 0.27            | Madagascar Antemoro       | Kenya Swahili Mombasa     | 38.83  | 32.40-43.84  | 0.20            | India Punjabi             | Kenya Swahili Mombasa     |
| Madagascar Antemoro                                  | 0    | 2D       | <0.01 | 0.99               | 1.00 | 1.00 | 31.73 | -           | 0.26          | Indonesia Banjar | Comoros Moheli            | 0.49          | South Africa Bantu Soweto | Comoros Moheli            | 0.41 | 29.68  | 26.54-30.14  | 0.26            | Indonesia Banjar          | Comoros Moheli            | 183.35 | 31.16-205.06 | 0.21            | Singapore Malay           | Comoros Moheli            |
| Madagascar Antemoro                                  | 1    | 2D       | <0.01 | 0.99               | 1.00 | 1.00 | 32.83 | -           | 0.27          | Indonesia Banjar | Comoros Moheli            | 0.46          | South Africa Bantu Soweto | Comoros Moheli            | 0.35 | 30.45  | 26.84-30.69  | 0.26            | Indonesia Banjar          | Comoros Moheli            | 152.77 | 34.24-161.06 | 0.16            | Indonesia Bugis           | Comoros Moheli            |
| Madagascar Mikea                                     | 0    | 2D       | <0.01 | 0.99               | 1.00 | 1.00 | 30.34 | -           | 0.26          | Indonesia Banjar | Comoros Moheli            | 0.45          | Namibia Kwangali          | Comoros Moheli            | 0.46 | 14.84  | 1.04-20.88   | 0.43            | Indonesia Banjar          | Kenya Swahili Mombasa     | 49.49  | 34.85-77.71  | 0.24            | Indonesia Banjar          | Comoros Moheli            |
| Madagascar Mikea                                     | 1    | 2D       | <0.01 | 0.99               | 1.00 | 1.00 | 30.73 | -           | 0.25          | Indonesia Banjar | Comoros Moheli            | 0.39          | Namibia Kwangali          | Comoros Moheli            | 0.39 | 5.57   | 1.09-29.24   | 0.36            | Kenya Swahili Mombasa     | Comoros Moheli            | 39.45  | 33.45-125.46 | 0.26            | Indonesia Banjar          | Comoros Moheli            |
| Madagascar Vezo                                      | 0    | 2D       | <0.01 | 0.99               | 1.00 | 1.00 | 26.88 | -           | 0.27          | Indonesia Banjar | Comoros Moheli            | 0.50          | Comoros Moheli            | South Africa Bantu Soweto | 0.52 | 22.34  | 16.73-26.37  | 0.28            | Indonesia Banjar          | Comoros Moheli            | 101.31 | 44.66-148.64 | 0.21            | Singapore Malay           | Comoros Moheli            |
| Madagascar Vezo                                      | 1    | 2D       | <0.01 | 0.99               | 1.00 | 1.00 | 26.99 | -           | 0.27          | Indonesia Banjar | Comoros Moheli            | 0.44          | South Africa Bantu Soweto | Comoros Moheli            | 0.48 | 21.17  | 18.51-26.98  | 0.30            | Indonesia Banjar          | Comoros Moheli            | 81.78  | 51.92-175.93 | 0.24            | Singapore Malay           | Comoros Moheli            |
| C-All Swahili individuals in one 'target population' |      |          |       |                    |      |      |       |             |               |                  |                           |               |                           |                           |      |        |              |                 |                           |                           |        |              |                 |                           |                           |
| Population                                           | Null | Best-fit | p     | R <sup>2</sup> .1D | FQ1  | FQ2  | G.1D  | G.1D 95%CI  | % 1D Source 1 | 1D Source 1      | 1D Source 2               | % MW Source 1 | MW Source 1               | MW Source 2               | M    | G.2D.1 | G.2D.1 95%CI | % 2D.1 Source 1 | 2D.1 Source 1             | 2D.1 Source 2             | G.2D.2 | G.2D.2 95%CI | % 2D.2 Source 1 | 2D.2 Source 1             | 2D.2 Source 2             |
| Kenya Swahili                                        | 0    | 2D       | <0.01 | 0.99               | 0.98 | 0.99 | 24.16 | -           | 0.12          | Ethiopia Oromo   | South Africa Bantu Soweto | 0.49          | Kenya Luhya               | South Africa Bantu Soweto | 0.44 | 19.91  | 6.9-23.5     | 0.12            | Ethiopia Oromo            | South Africa Bantu Soweto | 75.63  | 36.9-114.2   | 0.38            | South Africa Bantu Soweto | Namibia Kwangali          |
| Kenya Swahili                                        | 1    | 2D       | <0.01 | 0.99               | 0.99 | 1.00 | 27.69 | -           | 0.14          | Ethiopia Amhara  | South Africa Bantu Soweto | 0.45          | South Africa Bantu Soweto | Kenya-Luhya               | 0.47 | 13.44  | 8.45-16.7    | 0.1             | Ethiopia Amhara           | South Africa Bantu Soweto | 52.37  | 41.2-64.1    | 0.13            | Ethiopia Amhara           | South Africa Bantu Soweto |

| D-Each Swahili community analysed separately |      |          |       |                    |      |      |       |            |               |                 |                           |               |                           |                  |      |        |              |                 |                           |                           |        |              |                 |                 |                           |
|----------------------------------------------|------|----------|-------|--------------------|------|------|-------|------------|---------------|-----------------|---------------------------|---------------|---------------------------|------------------|------|--------|--------------|-----------------|---------------------------|---------------------------|--------|--------------|-----------------|-----------------|---------------------------|
| Population                                   | Null | Best-fit | p     | R <sup>2</sup> ,1D | FQ1  | FQ2  | G.1D  | G.1D 95%CI | % 1D Source 1 | 1D Source 1     | 1D Source 2               | % MW Source 1 | MW Source 1               | MW Source 2      | M    | G.2D.1 | G.2D.1 95%CI | % 2D.1 Source 1 | 2D.1 Source 1             | 2D.1 Source 2             | G.2D.2 | G.2D.2 95%CI | % 2D.2 Source 1 | 2D.2 Source 1   | 2D.2 Source 2             |
| Kenya Swahili Kilifi                         | 0    | 1D       | <0.01 | 0.98               | 0.99 | 1.00 | 23.85 | 21.1-25.1  | 0.12          | Ethiopia Tygray | South Africa Bantu Soweto | 0.42          | South Africa Bantu Soweto | Namibia Kwangali | 0.26 | 19.39  | -            | 0.12            | Ethiopia Tygray           | South Africa Bantu Soweto | 66.97  | -            | 0.37            | Comoros Moheli  | Namibia Kwangali          |
| Kenya Swahili Kilifi                         | 1    | 1D       | <0.01 | 0.98               | 0.98 | 0.99 | 26.59 | 23.7-30.7  | 0.13          | Ethiopia Oromo  | South Africa Bantu Soweto | 0.43          | South Africa Bantu Soweto | Namibia Kwangali | 0.24 | 14.73  | -            | 0.09            | Ethiopia Oromo            | South Africa Bantu Soweto | 56.27  | -            | 0.13            | Ethiopia Oromo  | South Africa Bantu Soweto |
| Kenya Swahili Lamu                           | 0    | 1D       | <0.01 | 0.98               | 1.00 | 1.00 | 25.25 | 23.4-29.1  | 0.11          | Ethiopia Tygray | South Africa Bantu Soweto | 0.49          | Comoros Moheli            | Namibia Kwangali | 0.17 | 1.00   | -            | 0.10            | Ethiopia Tygray           | South Africa Bantu Soweto | 28.71  | -            | 0.49            | Comoros Moheli  | Namibia Kwangali          |
| Kenya Swahili Lamu                           | 1    | 1D       | <0.01 | 0.97               | 0.99 | 1.00 | 28.33 | 25.4-30.9  | 0.12          | Ethiopia Oromo  | South Africa Bantu Soweto | 0.49          | South Africa Bantu Soweto | Namibia Kwangali | 0.30 | 8.57   | -            | 0.12            | South Africa Bantu Soweto | South Africa Bantu Soweto | 39.09  | -            | 0.13            | Ethiopia Oromo  | South Africa Bantu Soweto |
| Kenya Swahili Mombasa                        | 0    | 1D       | <0.01 | 0.98               | 0.99 | 1.00 | 24.35 | 19.8-26.6  | 0.13          | Yemen Yemeni    | South Africa Bantu Soweto | 0.46          | Kenya Luhya               | Comoros Moheli   | 0.16 | 13.46  | -            | 0.13            | Kenya Turkana             | South Africa Bantu Soweto | 41.37  | -            | 0.13            | Yemen Yemeni    | Namibia Kwangali          |
| Kenya Swahili Mombasa                        | 1    | 1D       | <0.01 | 0.97               | 0.99 | 1.00 | 26.84 | 20.8-32.2  | 0.15          | Ethiopia Amhara | South Africa Bantu Soweto | 0.39          | Comoros Moheli            | Namibia Kwangali | 0.30 | 8.51   | -            | 0.13            | Kenya Turkana             | South Africa Bantu Soweto | 44.14  | -            | 0.15            | Ethiopia Amhara | South Africa Bantu Soweto |

Table S11. GLOBETROTTER<sup>24</sup> inferred dates in generations from present (G) for each studied population. The table is separated into four sections according to the clustering defined in fineSTRUCTURE<sup>2</sup>: A-Comoros and Malagasy populations in the same cluster; B-Comoros and Malagasy in different clusters; C-All Swahili individuals in one 'target population'; D-Each Swahili community analyzed separately. The best-fit models of admixture are labeled as: 1D: one date; 2D: multiple dates; MW: multiway one date; U: uncertain. P: p-value of evidence of any detectable admixture event obtained after 100 bootstrap resamplings of the NULL procedure. Date confidence intervals are based on 100 bootstrap replicates of the date inference. M corresponds to the additional R<sup>2</sup> explained by adding a second date versus assuming only a single date of admixture (M>0.35 to infer multiple dates event). FQ1 and FQ2 correspond respectively to the fit of a single admixture event and the fit of the first two principal components capturing the admixture events.

| A-Comoros and Malagasy in the same cluster           |                    |                      |           |           |        |        |        |        |           |           |       |       |        |       |
|------------------------------------------------------|--------------------|----------------------|-----------|-----------|--------|--------|--------|--------|-----------|-----------|-------|-------|--------|-------|
| Population                                           | Source.A           | Source.B             | A.1       | SD.A.1    | Z.A.1  | G.1    | SD.G.1 | Z.G.1  | A.2       | SD.A.2    | Z.A.2 | G.2   | SD.G.2 | Z.G.2 |
| Comoros Anjouan                                      | Namibia Kwangali   | Philippines Igorot   | 6.332E-04 | 4.021E-05 | 15.748 | 23.873 | 1.789  | 13.343 |           |           |       |       |        |       |
| Comoros Grande Comore                                | Philippines Igorot | South Africa BantuSA | 6.998E-04 | 3.813E-05 | 18.353 | 26.717 | 1.553  | 17.198 |           |           |       |       |        |       |
| Comoros Moheli                                       | Namibia Kwangali   | Philippines Igorot   | 5.795E-04 | 6.199E-05 | 9.348  | 17.250 | 2.664  | 6.475  |           |           |       |       |        |       |
| Madagascar Antemoro                                  | Namibia Kwangali   | Philippines Igorot   | 1.421E-03 | 4.798E-05 | 29.613 | 28.874 | 1.160  | 24.883 |           |           |       |       |        |       |
| Madagasca Mikea                                      | Namibia Mbukushu   | Philippines Igorot   | 1.336E-03 | 7.172E-05 | 18.628 | 24.226 | 1.797  | 13.478 |           |           |       |       |        |       |
| Madagascar Vezo                                      | Namibia Kwangali   | Philippines Igorot   | 1.375E-03 | 7.15E-05  | 19.218 | 22.171 | 1.413  | 15.678 |           |           |       |       |        |       |
| B-Comoros and Malagasy in different clusters         |                    |                      |           |           |        |        |        |        |           |           |       |       |        |       |
| Population                                           | Source.A           | Source.B             | A.1       | SD.A.1    | Z.A.1  | G.1    | SD.G.1 | Z.G.1  | A.2       | SD.A.2    | Z.A.2 | G.2   | SD.G.2 | Z.G.2 |
| Comoros Anjouan                                      | Namibia Kwangali   | Philippines Igorot   | 6.339E-04 | 4.007E-05 | 15.821 | 23.906 | 1.783  | 13.408 |           |           |       |       |        |       |
| Comoros Grande Comore                                | Philippines Igorot | South Africa BantuSA | 7.002E-04 | 3.796E-05 | 18.446 | 26.737 | 1.547  | 17.288 |           |           |       |       |        |       |
| Comoros Moheli                                       | Namibia Kwangali   | Philippines Igorot   | 5.817E-04 | 6.173E-05 | 9.423  | 17.341 | 2.656  | 6.528  |           |           |       |       |        |       |
| Madagascar Antemoro                                  | Namibia Kwangali   | Philippines Igorot   | 1.42E-03  | 4.76E-05  | 29.839 | 28.895 | 1.152  | 25.079 |           |           |       |       |        |       |
| Madagasca Mikea                                      | Namibia Mbukushu   | Philippines Igorot   | 1.337E-03 | 7.16E-05  | 18.676 | 24.242 | 1.794  | 13.512 |           |           |       |       |        |       |
| Madagascar Vezo                                      | Namibia Kwangali   | Philippines Igorot   | 1.376E-03 | 7.12E-05  | 19.324 | 22.19  | 1.406  | 15.775 |           |           |       |       |        |       |
| C-All Swahili individuals in one 'target population' |                    |                      |           |           |        |        |        |        |           |           |       |       |        |       |
| Population                                           | Source.A           | Source.B             | A.1       | SD.A.1    | Z.A.1  | G.1    | SD.G.1 | Z.G.1  | A.2       | SD.A.2    | Z.A.2 | G.2   | SD.G.2 | Z.G.2 |
| Kenya Swahili                                        | Lybia Lybian Jew   | Namibia Kwangali     | 1.563E-04 | 2.946E-05 | 5.303  | 52.903 | 8.130  | 6.507  | 3.210E-05 | 8.450E-06 | 3.796 | 8.458 | 2.138  | 3.956 |
| D-Each Swahili community analysed separately         |                    |                      |           |           |        |        |        |        |           |           |       |       |        |       |
| Population                                           | Source.A           | Source.B             | A.1       | SD.A.1    | Z.A.1  | G.1    | SD.G.1 | Z.G.1  | A.2       | SD.A.2    | Z.A.2 | G.2   | SD.G.2 | Z.G.2 |
| Kenya Swahili Lamu                                   | Lebanon Lebanese   | South Africa BantuSA | 8.992E-05 | 1.500E-05 | 5.997  | 20.981 | 4.325  | 4.851  |           |           |       |       |        |       |
| Kenya Swahili Kilifi                                 | Kenya Bantu Kenya  | Syria Syrians        | 9.988E-05 | 1.368E-05 | 7.304  | 43.589 | 6.833  | 6.379  | 2.480E-05 | 7.761E-06 | 3.201 | 7.583 | 2.321  | 3.267 |
| Kenya Swahili Mombasa                                | Lebanon Lebanese   | Namibia Mbukushu     | 1.407E-04 | 2.792E-05 | 5.041  | 20.111 | 5.164  | 3.894  |           |           |       |       |        |       |

Table S12. MALDER<sup>58</sup> inferred dates in generations (G) from present for each studied population. The table is separated into four sections according to the clustering defined in fineSTRUCTURE<sup>2</sup>: A-Comoros and Malagasy populations in the same cluster; B-Comoros and Malagasy in different clusters; C-All Swahili individuals in one 'target population'; D-Each Swahili community analyzed separately. A: amplitude of the weighted LD curve; SD: standard deviation; Z: Z-score; G: date in generations of the latest (1) or earliest (2) admixture event.

| Population            | t-test         | Asian ancestry    | Middle Eastern ancestry | African ancestry  |
|-----------------------|----------------|-------------------|-------------------------|-------------------|
| Comoros Anjouan       | t              | -2,612            | <b>-4,829</b>           | <b>4,116</b>      |
|                       | P              | 0,020             | <b>&gt;0,0001</b>       | <b>0,001</b>      |
|                       | P <sub>c</sub> | 0,529             | <b>0,006</b>            | <b>0,025</b>      |
| Comoros Grande Comore | t              | -2,128            | <b>-4,873</b>           | <b>3,769</b>      |
|                       | P              | 0,048             | <b>&gt;0,0001</b>       | <b>0,002</b>      |
|                       | P <sub>c</sub> | 1,304             | <b>0,004</b>            | <b>0,041</b>      |
| Comoros Moheli        | t              | -0,257            | -1,741                  | <b>20,442</b>     |
|                       | P              | 0,801             | 0,104                   | <b>&gt;0,0001</b> |
|                       | P <sub>c</sub> | 21,632            | 2,798                   | <b>&gt;0,0001</b> |
| Madagascar Antemoro   | t              | 1,509             | 1,823                   | -1,658            |
|                       | P              | 0,145             | 0,081                   | 0,111             |
|                       | P <sub>c</sub> | 3,911             | 2,195                   | 2,994             |
| Madagascar Mikea      | t              | <b>5,084</b>      | 1,420                   | <b>-5,213</b>     |
|                       | P              | <b>&gt;0,0001</b> | 0,171                   | <b>&gt;0,0001</b> |
|                       | P <sub>c</sub> | <b>0,002</b>      | 4,617                   | <b>0,001</b>      |
| Madagascar Vezo       | t              | 2,503             | 0,832                   | -2,607            |
|                       | P              | 0,020             | 0,414                   | 0,016             |
|                       | P <sub>c</sub> | 0,536             | 11,175                  | 0,426             |
| Kenya Swahili Kilifi  | t              | -0,800            | 1,334                   | -0,853            |
|                       | P              | 0,429             | 0,191                   | 0,399             |
|                       | P <sub>c</sub> | 11,588            | 5,147                   | 10,778            |
| Kenya Swahili Lamu    | t              | -0,989            | 1,718                   | -0,615            |
|                       | P              | 0,331             | 0,096                   | 0,543             |
|                       | P <sub>c</sub> | 8,928             | 2,595                   | 14,670            |
| Kenya Swahili Mombasa | t              | -0,788            | -0,051                  | 0,393             |
|                       | P              | 0,441             | 0,960                   | 0,699             |
|                       | P <sub>c</sub> | 11,915            | 25,917                  | 18,869            |

Table S13. Student's t-tests between genetic ancestries estimated by ADMIXTURE<sup>7</sup> (K=3) for chromosome X and autosomes of populations from Comoros, Madagascar and Kenyan Swahili. Each ancestry is represented in Figure S13: Asian ancestry in blue; African ancestry in green and Middle Eastern ancestry in red. t: value of the t-test; P: nominal p-value; P<sub>c</sub>: corrected p-value after Bonferroni multiple test correction (n=27). Significant sex-bias ancestries are written in bold.

## References

1. Petkova, D., Novembre, J., and Stephens, M. (2016). Visualizing spatial population structure with estimated effective migration surfaces. *Nat Genet* 48, 94-100.
2. Lawson, D.J., Hellenthal, G., Myers, S., and Falush, D. (2012). Inference of population structure using dense haplotype data. *PLoS Genet* 8, e1002453.
3. Patterson, N., Price, A.L., and Reich, D. (2006). Population structure and eigenanalysis. *PLoS Genet* 2, e190.
4. Msaidie, S., Ducourneau, A., Boetsch, G., Longepied, G., Papa, K., Allibert, C., Yahaya, A.A., Chiaroni, J., and Mitchell, M.J. (2011). Genetic diversity on the Comoros Islands shows early seafaring as major determinant of human biocultural evolution in the Western Indian Ocean. *Eur J Hum Genet* 19, 89-94.
5. Browning, B.L., and Browning, S.R. (2013). Improving the accuracy and efficiency of identity-by-descent detection in population data. *Genetics* 194, 459-471.
6. Browning, S.R., and Browning, B.L. (2007). Rapid and accurate haplotype phasing and missing-data inference for whole-genome association studies by use of localized haplotype clustering. *The American Journal of Human Genetics* 81, 1084-1097.
7. Alexander, D.H., Novembre, J., and Lange, K. (2009). Fast model-based estimation of ancestry in unrelated individuals. *Genome Res* 19, 1655-1664.
8. Kopelman, N.M., Mayzel, J., Jakobsson, M., Rosenberg, N.A., and Mayrose, I. (2015). Clumpak: a program for identifying clustering modes and packaging population structure inferences across K. *Mol Ecol Resour* 15, 1179-1191.
9. Buchmann, R., and Hazelhurst, S. (2014). Genesis. In: (
10. Pickrell, J.K., and Pritchard, J.K. (2012). Inference of population splits and mixtures from genome-wide allele frequency data. *PLoS Genet* 8, e1002967.
11. Brisbin, A., Bryc, K., Byrnes, J., Zakharia, F., Omberg, L., Degenhardt, J., Reynolds, A., Ostrer, H., Mezey, J.G., and Bustamante, C.D. (2012). PCAdmix: Principal components-based assignment of ancestry along each chromosome in individuals with admixed ancestry from two or more populations. *Human biology* 84, 343-364.
12. Patin, E., Siddle, K.J., Laval, G., Quach, H., Harmant, C., Becker, N., Froment, A., Regnault, B., Lemee, L., Gravel, S., et al. (2014). The impact of agricultural emergence on the genetic history of African rainforest hunter-gatherers and agriculturalists. *Nat Commun* 5, 3163.
13. Patterson, N.J., Moorjani, P., Luo, Y., Mallick, S., Rohland, N., Zhan, Y., Genschoreck, T., Webster, T., and Reich, D. (2012). Ancient admixture in human history. *Genetics* 192, 1065-1093.
14. Henn, B.M., Gignoux, C.R., Jobin, M., Granka, J.M., Macpherson, J.M., Kidd, J.M., Rodriguez-Botigue, L., Ramachandran, S., Hon, L., Brisbin, A., et al. (2011). Hunter-gatherer genomic diversity suggests a southern African origin for modern humans. *Proc Natl Acad Sci U S A* 108, 5154-5162.
15. Triska, P., Soares, P., Patin, E., Fernandes, V., Cerny, V., and Pereira, L. (2015). Extensive Admixture and Selective Pressure Across the Sahel Belt. *Genome biology and evolution* 7, 3484-3495.
16. Genomes Project, C., Auton, A., Brooks, L.D., Durbin, R.M., Garrison, E.P., Kang, H.M., Korbel, J.O., Marchini, J.L., McCarthy, S., McVean, G.A., et al. (2015). A global reference for human genetic variation. *Nature* 526, 68-74.
17. Schlebusch, C.M., Skoglund, P., Sjodin, P., Gattepaille, L.M., Hernandez, D., Jay, F., Li, S., De Jongh, M., Singleton, A., Blum, M.G., et al. (2012). Genomic variation in seven Khoe-San groups reveals adaptation and complex African history. *Science* 338, 374-379.
18. Pierron, D., Razafindrazaka, H., Pagani, L., Ricaut, F.-X., Antao, T., Capredon, M., Sambo, C., Radimilahy, C., Rakotoarisoa, J.-A., Blench, R.M., et al. (2014). Genome-wide evidence of Austronesian-Bantu admixture and cultural reversion in a hunter-gatherer group of Madagascar. *PNAS* 111, 936-941.



19. Montinaro, F., Busby, G.B., Gonzalez-Santos, M., Oosthuizen, O., Oosthuizen, E., Anagnostou, P., Destro-Bisol, G., Pascali, V.L., and Capelli, C. (2017). Complex Ancient Genetic Structure and Cultural Transitions in Southern African Populations. *Genetics* 205, 303-316.
20. May, A., Hazelhurst, S., Li, Y., Norris, S.A., Govind, N., Tikly, M., Hon, C., Johnson, K.J., Hartmann, N., Staedtler, F., et al. (2013). Genetic diversity in black South Africans from Soweto. *BMC Genomics* 14, 644.
21. Pagani, L., Kivisild, T., Tarekegn, A., Ekong, R., Plaster, C., Gallego Romero, I., Ayub, Q., Mehdi, S.Q., Thomas, M.G., Luiselli, D., et al. (2012). Ethiopian genetic diversity reveals linguistic stratification and complex influences on the Ethiopian gene pool. *Am J Hum Genet* 91, 83-96.
22. Behar, D.M., Yunusbayev, B., Metspalu, M., Metspalu, E., Rosset, S., Parik, J., Rootsi, S., Chaubey, G., Kutuev, I., Yudkovsky, G., et al. (2010). The genome-wide structure of the Jewish people. *Nature* 466, 238-242.
23. Behar, D.M., Metspalu, M., Baran, Y., Kopelman, N.M., Yunusbayev, B., Gladstein, A., Tzur, S., Sahakyan, H., Bahmanimehr, A., Yepiskoposyan, L., et al. (2013). No evidence from genome-wide data of a Khazar origin for the Ashkenazi Jews. *Hum Biol* 85, 859-900.
24. Hellenthal, G., Busby, G.B., Band, G., Wilson, J.F., Capelli, C., Falush, D., and Myers, S. (2014). A genetic atlas of human admixture history. *Science* 343, 747-751.
25. Haber, M., Gauguier, D., Youhanna, S., Patterson, N., Moorjani, P., Botigue, L.R., Platt, D.E., Matisoo-Smith, E., Soria-Hernanz, D.F., Wells, R.S., et al. (2013). Genome-wide diversity in the levant reveals recent structuring by culture. *PLoS Genet* 9, e1003316.
26. Yunusbayev, B., Metspalu, M., Metspalu, E., Valeev, A., Litvinov, S., Valiev, R., Akhmetova, V., Balanovska, E., Balanovsky, O., Turdikulova, S., et al. (2015). The genetic legacy of the expansion of Turkic-speaking nomads across Eurasia. *PLoS Genet* 11, e1005068.
27. Morseburg, A., Pagani, L., Ricaut, F.X., Yngvadottir, B., Harney, E., Castillo, C., Hoogervorst, T., Antao, T., Kusuma, P., Brucato, N., et al. (2016). Multi-layered population structure in Island Southeast Asians. *Eur J Hum Genet* 24, 1605-1611.
28. Kusuma, P., Brucato, N., Cox, M.P., Letellier, T., Manan, A., Grangé, P., Sudoyo, H., and Ricaut, F.X. (2017). The last sea nomads of the Indonesian archipelago: genomic origins and dispersal. *European Journal of Human Genetics*.
29. Brucato, N., Kusuma, P., Cox, M.P., Pierron, D., Purnomo, G.A., Adelaar, A., Kivisild, T., Letellier, T., Sudoyo, H., and Ricaut, F.X. (2016). Malagasy Genetic Ancestry Comes from an Historical Malay Trading Post in Southeast Borneo. *Mol Biol Evol* 33, 2396-2400.
30. Kusuma, P., Brucato, N., Cox, M.P., Pierron, D., Razafindrazaka, H., Adelaar, A., Sudoyo, H., Letellier, T., and Ricaut, F.X. (2016). Contrasting Linguistic and Genetic Origins of the Asian Source Populations of Malagasy. *Sci Rep* 6, 26066.
31. Teo, Y.Y., Sim, X., Ong, R.T., Tan, A.K., Chen, J., Tantoso, E., Small, K.S., Ku, C.S., Lee, E.J., Seielstad, M., et al. (2009). Singapore Genome Variation Project: a haplotype map of three Southeast Asian populations. *Genome Res* 19, 2154-2162.
32. Basu, A., Sarkar-Roy, N., and Majumder, P.P. (2016). Genomic reconstruction of the history of extant populations of India reveals five distinct ancestral components and a complex structure. *Proc Natl Acad Sci U S A* 113, 1594-1599.
33. Metspalu, M., Romero, I.G., Yunusbayev, B., Chaubey, G., Mallick, C.B., Hudjashov, G., Nelis, M., Magi, R., Metspalu, E., Remm, M., et al. (2011). Shared and unique components of human population structure and genome-wide signals of positive selection in South Asia. *Am J Hum Genet* 89, 731-744.
34. Krings, M., Salem, A.E., Bauer, K., Geisert, H., Malek, A.K., Chaix, L., Simon, C., Welsby, D., Di Rienzo, A., Utermann, G., et al. (1999). mtDNA analysis of Nile River Valley populations: A genetic corridor or a barrier to migration? *Am J Hum Genet* 64, 1166-1176.
35. Kivisild, T., Reidla, M., Metspalu, E., Rosa, A., Brehm, A., Pennarun, E., Parik, J., Geberhiwot, T., Usanga, E., and Villems, R. (2004). Ethiopian mitochondrial DNA heritage: tracking gene flow across and around the gate of tears. *Am J Hum Genet* 75, 752-770.

36. Watson, E., Bauer, K., Aman, R., Weiss, G., von Haeseler, A., and Paabo, S. (1996). mtDNA sequence diversity in Africa. *Am J Hum Genet* 59, 437-444.
37. Kusuma, P., Cox, M.P., Pierron, D., Razafindrazaka, H., Brucato, N., Tonasso, L., Suryadi, H.L., Letellier, T., Sudoyo, H., and Ricaut, F.-X. (2015). Mitochondrial DNA and the Y chromosome suggest the settlement of Madagascar by Indonesian sea nomad populations. *BMC Genomics* 16, 191.
38. Lansing, J.S., Cox, M.P., de Vet, T.A., Downey, S.S., Hallmark, B., and Sudoyo, H. (2011). An ongoing Austronesian expansion in Island Southeast Asia. *Journal of Anthropological Archaeology* 30, 262-272.
39. Horai, S., and Hayasaka, K. (1990). Intraspecific nucleotide sequence differences in the major noncoding region of human mitochondrial DNA. *Am J Hum Genet* 46, 828-842.
40. Brandstatter, A., Peterson, C.T., Irwin, J.A., Mpoke, S., Koech, D.K., Parson, W., and Parsons, T.J. (2004). Mitochondrial DNA control region sequences from Nairobi (Kenya): inferring phylogenetic parameters for the establishment of a forensic database. *Int J Legal Med* 118, 294-306.
41. Tofanelli, S., Bertoni, S., Castri, L., Luiselli, D., Calafell, F., Donati, G., and Paoli, G. (2009). On the origins and admixture of Malagasy: new evidence from high-resolution analyses of paternal and maternal lineages. *Mol Biol Evol* 26, 2109-2124.
42. Hurler, M.E., Sykes, B.C., Jobling, M.A., and Forster, P. (2005). The dual origin of the Malagasy in Island Southeast Asia and East Africa: evidence from maternal and paternal lineages. *Am J Hum Genet* 76, 894-901.
43. Pereira, L., Macaulay, V., Torroni, A., Scozzari, R., Prata, M.J., and Amorim, A. (2001). Prehistoric and historic traces in the mtDNA of Mozambique: insights into the Bantu expansions and the slave trade. *Ann Hum Genet* 65, 439-458.
44. Rowold, D.J., Luis, J.R., Terreros, M.C., and Herrera, R.J. (2007). Mitochondrial DNA gene flow indicates preferred usage of the Levant Corridor over the Horn of Africa passageway. *J Hum Genet* 52, 436-447.
45. Castri, L., Tofanelli, S., Garagnani, P., Bini, C., Fosella, X., Pelotti, S., Paoli, G., Pettener, D., and Luiselli, D. (2009). mtDNA variability in two Bantu-speaking populations (Shona and Hutu) from Eastern Africa: implications for peopling and migration patterns in sub-Saharan Africa. *Am J Phys Anthropol* 140, 302-311.
46. Tishkoff, S.A., Gonder, M.K., Henn, B.M., Mortensen, H., Knight, A., Gignoux, C., Fernandopulle, N., Lema, G., Nyambo, T.B., Ramakrishnan, U., et al. (2007). History of click-speaking populations of Africa inferred from mtDNA and Y chromosome genetic variation. *Mol Biol Evol* 24, 2180-2195.
47. Hey, J. (1997). Mitochondrial and nuclear genes present conflicting portraits of human origins. *Mol Biol Evol* 14, 166-172.
48. Chen, Y.S., Olckers, A., Schurr, T.G., Kogelnik, A.M., Huoponen, K., and Wallace, D.C. (2000). mtDNA variation in the South African Kung and Khwe and their genetic relationships to other African populations. *Am J Hum Genet* 66, 1362-1383.
49. Mishmar, D., Ruiz-Pesini, E., Golik, P., Macaulay, V., Clark, A.G., Hosseini, S., Brandon, M., Easley, K., Chen, E., Brown, M.D., et al. (2003). Natural selection shaped regional mtDNA variation in humans. *Proc Natl Acad Sci U S A* 100, 171-176.
50. Knight, A., Underhill, P.A., Mortensen, H.M., Zhivotovskiy, L.A., Lin, A.A., Henn, B.M., Louis, D., Ruhlen, M., and Mountain, J.L. (2003). African Y chromosome and mtDNA divergence provides insight into the history of click languages. *Curr Biol* 13, 464-473.
51. Luis, J.R., Rowold, D.J., Regueiro, M., Caeiro, B., Cinnioglu, C., Roseman, C., Underhill, P.A., Cavalli-Sforza, L.L., and Herrera, R.J. (2004). The Levant versus the Horn of Africa: evidence for bidirectional corridors of human migrations. *Am J Hum Genet* 74, 532-544.
52. Wood, E.T., Stover, D.A., Ehret, C., Destro-Bisol, G., Spedini, G., McLeod, H., Louie, L., Bamshad, M., Strassmann, B.I., Soodyall, H., et al. (2005). Contrasting patterns of Y chromosome and

- mtDNA variation in Africa: evidence for sex-biased demographic processes. *Eur J Hum Genet* 13, 867-876.
53. Semino, O., Santachiara-Benerecetti, A.S., Falaschi, F., Cavalli-Sforza, L.L., and Underhill, P.A. (2002). Ethiopians and Khoisan share the deepest clades of the human Y-chromosome phylogeny. *Am J Hum Genet* 70, 265-268.
  54. Cruciani, F., Santolamazza, P., Shen, P., Macaulay, V., Moral, P., Olckers, A., Modiano, D., Holmes, S., Destro-Bisol, G., Coia, V., et al. (2002). A back migration from Asia to sub-Saharan Africa is supported by high-resolution analysis of human Y-chromosome haplotypes. *Am J Hum Genet* 70, 1197-1214.
  55. Alves, C., Gusmao, L., Barbosa, J., and Amorim, A. (2003). Evaluating the informative power of Y-STRs: a comparative study using European and new African haplotype data. *Forensic Sci Int* 134, 126-133.
  56. Hallenberg, C., Simonsen, B., Sanchez, J., and Morling, N. (2005). Y-chromosome STR haplotypes in Somalis. *Forensic Sci Int* 151, 317-321.
  57. Hassan, H.Y., Underhill, P.A., Cavalli-Sforza, L.L., and Ibrahim, M.E. (2008). Y-chromosome variation among Sudanese: restricted gene flow, concordance with language, geography, and history. *Am J Phys Anthropol* 137, 316-323.
  58. Loh, P.R., Lipson, M., Patterson, N., Moorjani, P., Pickrell, J.K., Reich, D., and Berger, B. (2013). Inferring admixture histories of human populations using linkage disequilibrium. *Genetics* 193, 1233-1254.
